# Effective Treatments and Skill Building in Psychotherapies for the Clinician

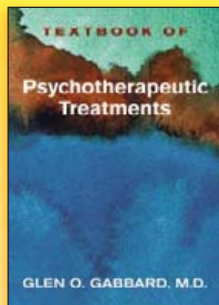

## Textbook of Psychotherapeutic Treatments

Edited by  
Glen O. Gabbard, M.D.

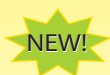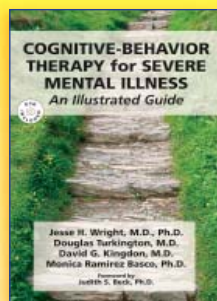

## Cognitive-Behavior Therapy for Severe Mental Illness An Illustrated Guide

Jesse H. Wright, M.D., Ph.D.,  
Douglas Turkington, M.D.,  
David G. Kingdon, M.D., and  
Monica Ramirez Basco, Ph.D.

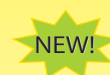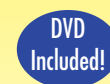

This authoritative work boasts many must-have features:

- All the major psychotherapeutic modalities are addressed, including sections on psychodynamic psychotherapy; cognitive therapy; interpersonal psychotherapy; supportive psychotherapy; family systems therapy; the different modalities of couples, group, and family therapies; dialectical behavioral therapy; and mentalization-based therapy.
- This comprehensive, current overview of the field is versatile and can be used as a textbook for a course; as a reference for the mental health professional who needs to match a specific type of therapy to a particular patient; or as a clinical handbook.
- The sections are structured in a consistent manner, with each featuring individual chapters on theory, technique, indications and efficacy, and the combination of psychotherapy and medication.
- The text provides chapters on the neurobiological underpinnings of psychotherapy—a burgeoning field—and on the nature of professional boundaries in psychotherapy—as indispensable to the student first contemplating personal and professional ethics as to the clinician actively embodying them.

Treatment outcome depends on carefully matching the therapeutic modality to the patient or client. This book will both facilitate and enhance that meticulous process.

2009 • 944 pages • ISBN 978-1-58562-304-4 • Hardcover • Item #62304  
**Special Prepublication Price \$75.00** until October 31, 2008  
thereafter \$95.00

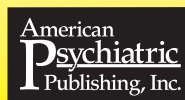

The First and Last Word in Psychiatry

This is the only book to present a comprehensive CBT approach that can be used across the broad range of severe Axis I disorders to prevent relapse, promote treatment adherence, reduce symptoms, and maintain treatment gains. The authors, all internationally recognized experts in using CBT for severe mental illness, provide a host of functional strategies for treating patients with schizophrenia, bipolar disorder, and treatment-refractory depression. The eighteen videos show CBT in action, demonstrating such scenarios as tracing origins of paranoia and formulating an antisuicide plan. Readers seeking to learn or improve their use of CBT for severe mental illness will

- Master the key processes of engaging, assessing, normalizing, educating, and formulating
- Learn methods to help patients reduce delusional thinking, cope with hallucinations, and target hopelessness, suicidality, low energy and interest, and poor self-esteem
- Prevent relapse in bipolar disorder through such methods as monitoring symptoms and promoting good sleep
- Address interpersonal problems common in patients with severe mental illness, showing how to build support and cope with dysfunctional or terminated relationships
- Apply CBT procedures to improve negative symptoms in schizophrenia, such as attention deficit and anhedonia

The book is an ideal companion to the authors' popular introductory text *Learning Cognitive-Behavior Therapy*, building on its critically acclaimed methodology to offer guidelines for effective treatment. This book shows how CBT enhances pharmacotherapy and helps practitioners develop important skills in treating challenging clinical problems.

2009 • 400 pages • ISBN 978-1-58562-321-1 • Paperback • \$65.00  
Item #62321

# Over 400 Medications Can Cause Dry Mouth!

Celebrex®

Lipitor®

Prozac®

Zoloft®

Wellbutrin®

Nexium®

Allegra®

Prevacid®

Lunesta®

Prilosec®

Ditropan®

Paxil®

Lexapro®

Detrol®

Aleve®

Zyrtec®

# biotène®

#1 Recommended Brand by Dentists & Hygienists\*

The most common cause of dry mouth is medication. Without oral health, your patients will have difficulty maintaining overall good health.

## Symptoms of a DRY MOUTH:

- Bad Breath
- Bleeding Gums
- Cracked Lips
- Cavities
- Mouth Sores
- Teeth Staining

## Steps for Dry Mouth Care

1. Brush twice a day with Biotène Dry Mouth Toothpaste to boost and restore saliva's natural antibacterial defense. Rinse with Biotène Mouthwash for extra protection.
2. Use Biotène Moisturizing Mouth Spray to provide extra protection and help relieve dryness throughout the day.
3. For serious dryness, use Biotène's Oralbalance Moisturizing Liquid or Gel to protect sore mouth tissues up to 8 hours.
4. Visit your dentist at least two times a year for cleanings.

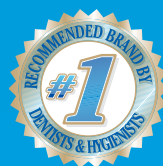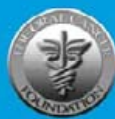

Recommended by the Oral Cancer Foundation\*

\*Data on file

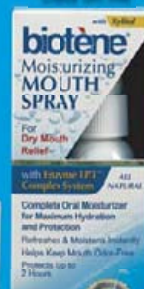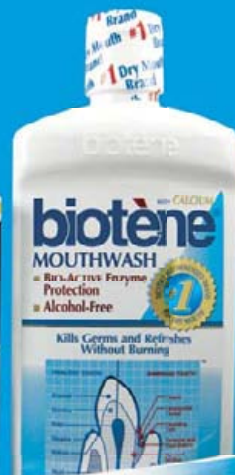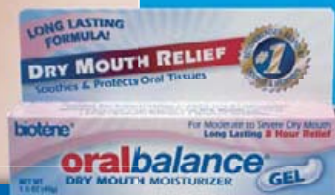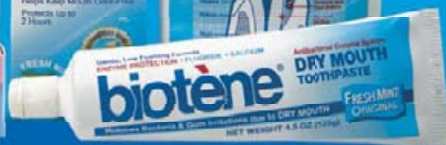

All product names are trademarks or registered trademarks of their respective owners.

To learn more about dry mouth relief and protection, visit us at [www.biotene.com](http://www.biotene.com) or call (800) 922-5856

Contains the proven LP3 Salivary Enzyme Complex



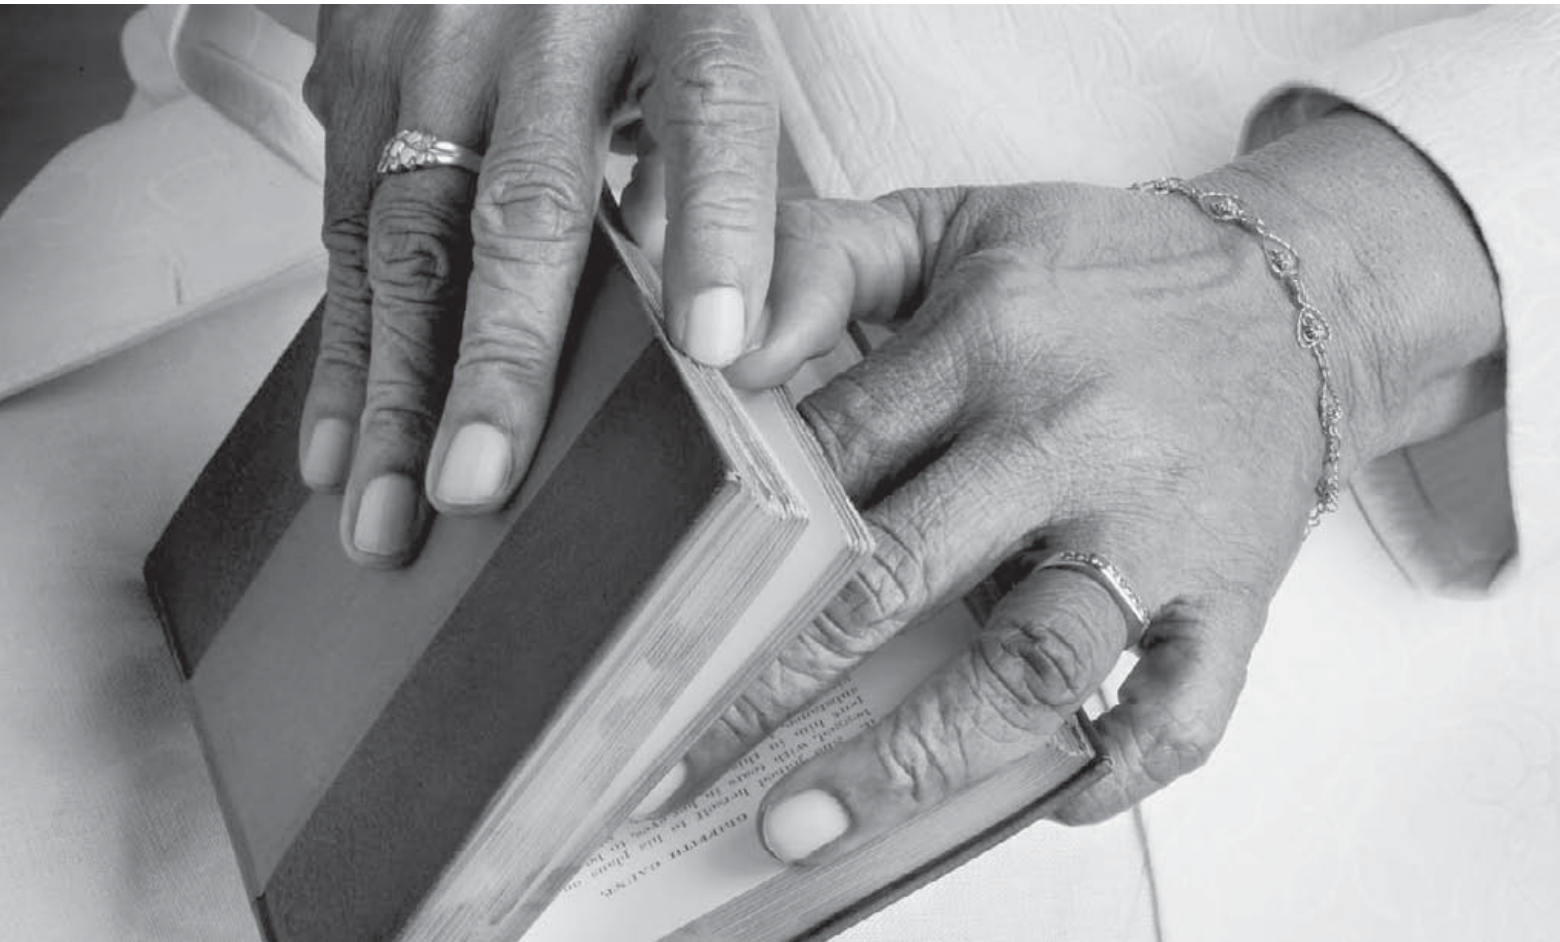

## Complex puzzles. Comprehensive solutions.

At Western Psychiatric Institute and Clinic of UPMC, we take on complex disorders that some other centers won't even attempt to treat.

But whether a patient has a difficult-to-treat disorder or one more easily treated, teams of specialists in psychiatry, psychopharmacology, clinical psychology, and medicine craft complete, individualized treatment plans that draw upon the latest clinical research, much of it conducted by our own investigators. Whether we're interpreting our clinical trial data or a patient's lab results, our work to advance the understanding and treatment of bipolar disorder,

eating disorders, autism, and geriatric behavioral health issues is world-class. In fact, we have one of the world's most comprehensive programs for mood disorders, with research-based treatments for patients at every level of need, at every stage of life.

With more than 400 inpatient psychiatric beds and 75 ambulatory programs, we care for people when they're feeling their worst *and* support them when they're at their best, back with their families in their home towns. Each year, Western Psychiatric helps some 30,000 people of all ages — at all stages of recovery, from all over the world — live healthier and more productive lives.

# UPMC

upmc.com | 1-800-533-UPMC

Affiliated with the **University of Pittsburgh School of Medicine**,  
UPMC is ranked among the nation's best hospitals by *U.S. News & World Report*.

Choose SEROQUEL for bipolar depression

# SEROQUEL is the only mood-stabilizing atypical approved to control the depressive symptoms of bipolar disorder<sup>1,2</sup>

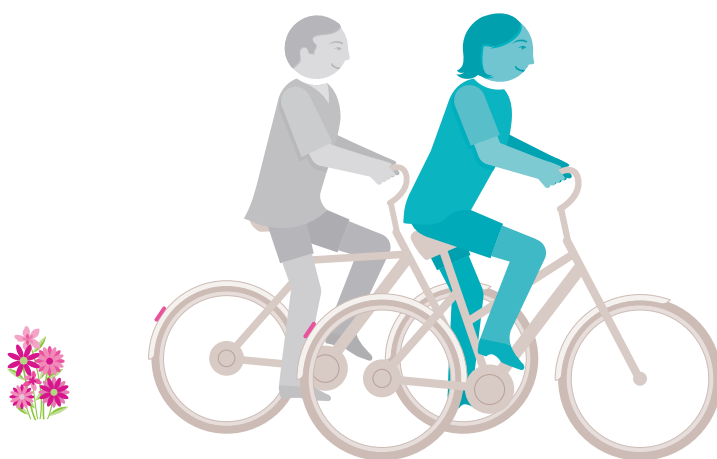

## Important Safety Information for SEROQUEL

- SEROQUEL is indicated for the treatment of depressive episodes in bipolar disorder; acute manic episodes in bipolar I disorder, as either monotherapy or adjunct therapy to lithium or divalproex; for the maintenance treatment of bipolar I disorder as adjunct therapy to lithium or divalproex; and schizophrenia. Patients should be periodically reassessed to determine the need for continued treatment and the appropriate dose
- **Elderly patients with dementia-related psychosis treated with atypical antipsychotic drugs are at an increased risk (1.6 to 1.7 times) of death, compared to placebo (4.5% vs 2.6%, respectively). SEROQUEL is not approved for the treatment of patients with dementia-related psychosis (See Boxed Warning)**
- **Antidepressants increased the risk of suicidal thinking and behavior in children, adolescents, and young adults in short-term studies of major depressive disorder and other psychiatric disorders. Patients of all ages started on therapy should be observed closely for clinical worsening, suicidality, or unusual changes in behavior. Families and caregivers should be advised of the need for close observation and communication with the prescriber. SEROQUEL is not approved for use in patients under the age of 18 years (See Boxed Warning)**

*For bipolar disorder*

Please see additional Important Safety Information on the adjacent pages, and Brief Summary, including Boxed Warnings, adjacent to this ad.

 **Seroquel**<sup>®</sup>  
quetiapine fumarate  
25 mg, 50 mg, 100 mg, 200 mg, 300 mg & 400 mg tablets

# SEROQUEL is the only mood-stabilizing atypical approved to control the depressive symptoms of bipolar disorder<sup>1,2</sup>

- SEROQUEL is approved for both the acute and maintenance treatment of bipolar depression\*<sup>1</sup>
- SEROQUEL stabilizes mood in both acute mania and bipolar depression<sup>1</sup>
- As adjunct therapy, SEROQUEL helps maintain remission of depressive symptoms\*<sup>3</sup>

*\*Maintenance therapy as adjunct to lithium or divalproex.*

## Important Safety Information for SEROQUEL, continued

- Hyperglycemia, in some cases extreme and associated with ketoacidosis, hyperosmolar coma, or death, has been reported in patients treated with atypical antipsychotics, including SEROQUEL. The relationship of atypical use and glucose abnormalities is complicated by the possibility of increased risk of diabetes in the schizophrenic population and the increasing incidence of diabetes in the general population. However, epidemiological studies suggest an increased risk of treatment-emergent, hyperglycemia-related adverse reactions in patients treated with atypical antipsychotics. Patients starting treatment with atypical antipsychotics who have or are at risk for diabetes should undergo fasting blood glucose testing at the beginning of and periodically during treatment. Patients who develop symptoms of hyperglycemia should also undergo fasting blood glucose testing
- A potentially fatal symptom complex, sometimes referred to as Neuroleptic Malignant Syndrome (NMS), has been reported in association with administration of antipsychotic drugs, including SEROQUEL. Rare cases of NMS have been reported with SEROQUEL. Clinical manifestations of NMS are hyperpyrexia, muscle rigidity, altered mental status, and evidence of autonomic instability (irregular pulse or blood pressure, tachycardia, diaphoresis, and cardiac dysrhythmia). Additional signs may include elevated creatine phosphokinase, myoglobinuria (rhabdomyolysis), and acute renal failure. The management of NMS should include immediate discontinuation of antipsychotic drugs
- Leukopenia, neutropenia, and agranulocytosis (including fatal cases), have been reported temporally related to atypical antipsychotics, including SEROQUEL. Patients with a pre-existing low white blood cell (WBC) count or a history of drug induced leukopenia/neutropenia should have their complete blood count monitored frequently during the first few months of therapy. In these patients, SEROQUEL should be discontinued at the first sign of a decline in WBC absent other causative factors. Patients with neutropenia should be carefully monitored, and SEROQUEL should be discontinued in any patient if the absolute neutrophil count is  $< 1000/\text{mm}^3$
- Tardive dyskinesia (TD), a potentially irreversible syndrome of involuntary dyskinesic movements, may develop in patients treated with antipsychotic drugs. The risk of developing TD and the likelihood that it will become irreversible are believed to increase as the duration of treatment and total cumulative dose of antipsychotic drugs administered to the patient increase. TD may remit, partially or completely, if antipsychotic treatment is withdrawn. SEROQUEL should be prescribed in a manner that is most likely to minimize the occurrence of TD

**Please see additional Important Safety Information on the adjacent pages, and Brief Summary, including Boxed Warnings, adjacent to this ad.**

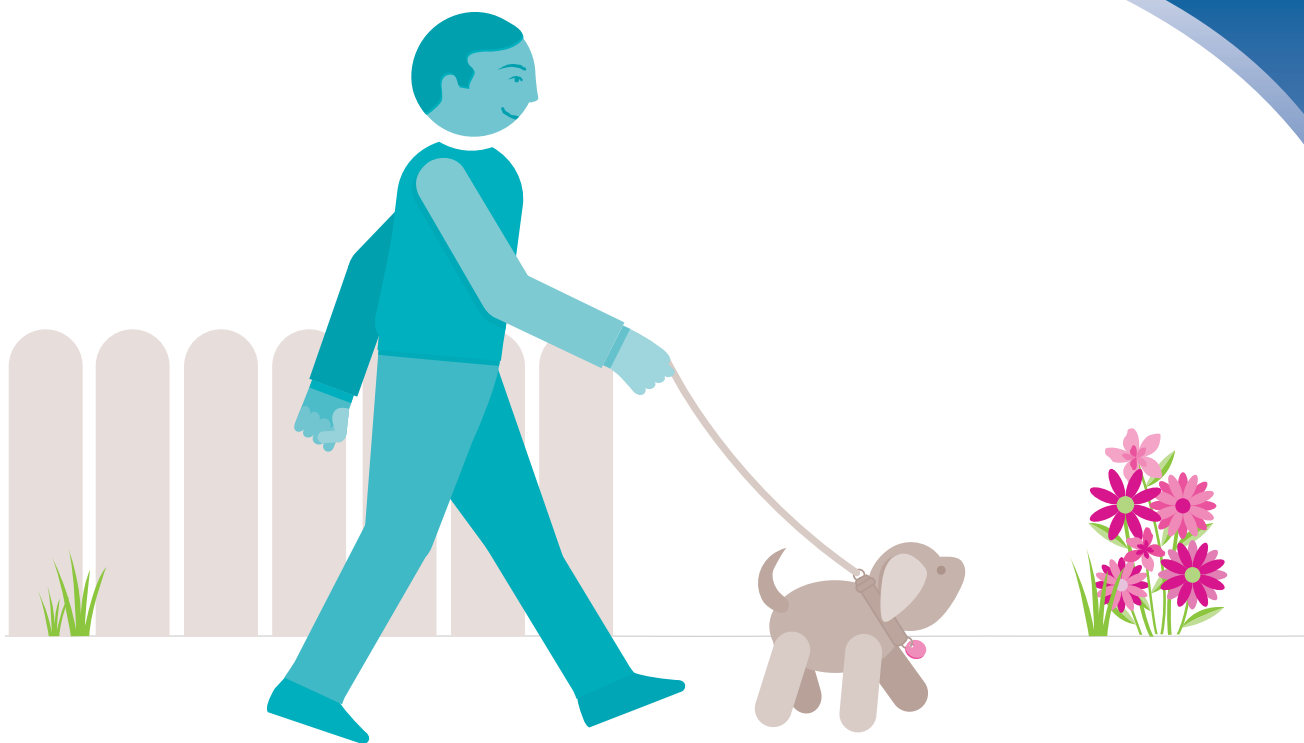

## Important Safety Information for SEROQUEL, continued

- Warnings and Precautions also include the risk of orthostatic hypotension, cataracts, seizures, hyperlipidemia, and possibility of suicide attempts. Examination of the lens by methods adequate to detect cataract formation, such as slit lamp exam or other appropriately sensitive methods, is recommended at initiation of treatment or shortly thereafter, and at 6-month intervals during chronic treatment. The possibility of a suicide attempt is inherent in schizophrenia, and close supervision of high risk patients should accompany drug therapy
- The most commonly observed adverse reactions associated with the use of SEROQUEL versus placebo in clinical trials for schizophrenia and bipolar disorder were dry mouth (9%-44% vs 3%-13%), sedation (30% vs 8%), somnolence (18%-34% vs 7%-9%), dizziness (9%-18% vs 5%-7%), constipation (8%-10% vs 3%-5%), asthenia (5%-10% vs 3%-4%), abdominal pain (4%-7% vs 1%-3%), postural hypotension (4%-7% vs 1%-2%), pharyngitis (4%-6% vs 3%), weight gain (5%-6% vs 1%-3%), lethargy (5% vs 2%), nasal congestion (5% vs 3%), SGPT increased (5% vs 1%), and dyspepsia (5%-7% vs 1%-4%)
- In long-term clinical trials of quetiapine, hyperglycemia (fasting glucose  $\geq 126$  mg/dL) was observed in 10.7% of patients receiving quetiapine (mean exposure 213 days) vs 4.6% in patients receiving placebo (mean exposure 152 days)

*For bipolar disorder*

**References:** 1. SEROQUEL Prescribing Information.  
2. Data on file, DA-SER-51, AstraZeneca Pharmaceuticals LP.  
3. Data on file, 263170, AstraZeneca Pharmaceuticals LP.

© 2008 AstraZeneca Pharmaceuticals LP. All rights reserved.  
SEROQUEL is a registered trademark of the AstraZeneca group of companies.  
263625 6/08 [www.SEROQUEL.com](http://www.SEROQUEL.com)

 **Seroquel**<sup>®</sup>  
quetiapine fumarate  
25 mg, 50 mg, 100 mg, 200 mg, 300 mg & 400 mg tablets



# SEROQUEL

(quetiapine fumarate)

## TABLETS

### RX ONLY

**BRIEF SUMMARY:** For full Prescribing Information, see package insert.

#### WARNING: INCREASED MORTALITY IN ELDERLY PATIENTS WITH DEMENTIA-RELATED PSYCHOSIS

Elderly patients with dementia-related psychosis treated with atypical antipsychotic drugs are at an increased risk of death compared to placebo. Analyses of seventeen placebo-controlled trials (modal duration of 10 weeks) in these patients revealed a risk of death in the drug-treated patients of between 1.6 to 1.7 times that seen in placebo-treated patients. Over the course of a typical 10-week controlled trial, the rate of death in drug-treated patients was about 4.5%, compared to a rate of about 2.6% in the placebo group. Although the causes of death were varied, most of the deaths appeared to be either cardiovascular (eg, heart failure, sudden death) or infectious (eg, pneumonia) in nature. SEROQUEL (quetiapine) is not approved for the treatment of patients with Dementia-Related Psychosis.

#### SUICIDALITY AND ANTIDEPRESSANT DRUGS

Antidepressants increased the risk compared to placebo of suicidal thinking and behavior (suicidality) in children, adolescents, and young adults in short-term studies of major depressive disorder (MDD) and other psychiatric disorders. Anyone considering the use of SEROQUEL or any other antidepressant in a child, adolescent, or young adult must balance this risk with the clinical need. Short-term studies did not show an increase in the risk of suicidality with antidepressants compared to placebo in adults beyond age 24; there was a reduction in risk with antidepressants compared to placebo in adults aged 65 and older. Depression and certain other psychiatric disorders are themselves associated with increases in the risk of suicide. Patients of all ages who are started on antidepressant therapy should be monitored appropriately and observed closely for clinical worsening, suicidality, or unusual changes in behavior. Families and caregivers should be advised of the need for close observation and communication with the prescriber. SEROQUEL is not approved for use in pediatric patients (see *Warnings and Precautions*).

#### INDICATIONS AND USAGE

**Bipolar Disorder** SEROQUEL is indicated for the: • treatment of depressive episodes associated with bipolar disorder; • treatment of acute manic episodes associated with bipolar I disorder as either monotherapy or adjunct therapy to lithium or divalproex; and • maintenance treatment of bipolar I disorder as adjunct therapy to lithium or divalproex. **Depression** The efficacy of SEROQUEL was established in two identical 8-week randomized, placebo-controlled double-blind clinical studies that included either bipolar I or II patients [see **Clinical Pharmacology** in full Prescribing Information (12)]. Effectiveness has not been systematically evaluated in clinical trials for more than 8 weeks. **Mania** The efficacy of SEROQUEL in acute bipolar mania was established in two 12-week monotherapy trials and one 3-week adjunct therapy trial of bipolar I patients initially hospitalized for up to 7 days for acute mania [see **Clinical Pharmacology** in full Prescribing Information (12)]. Effectiveness has not been systematically evaluated in clinical trials for more than 12 weeks in monotherapy. **Maintenance Treatment in Bipolar Disorder** The efficacy of SEROQUEL as adjunct maintenance therapy to lithium or divalproex was established in 2 identical randomized placebo-controlled double-blind studies in patients with Bipolar I Disorder [see **Clinical Studies** in full Prescribing Information (14)]. The physician who elects to use SEROQUEL for extended periods in Bipolar Disorder should periodically re-evaluate the long-term risks and benefits of the drug for the individual patient (see **Dosage and Administration**). **Schizophrenia** SEROQUEL is indicated for the treatment of schizophrenia. The efficacy of SEROQUEL in schizophrenia was established in short-term (6-week) controlled trials of schizophrenic inpatients [see **Clinical Pharmacology** in full Prescribing Information (12)]. The effectiveness of SEROQUEL in long-term use, that is, for more than 6 weeks, has not been systematically evaluated in controlled trials. Therefore, the physician who elects to use SEROQUEL for extended periods should periodically re-evaluate the long-term usefulness of the drug for the individual patient (see **Dosage and Administration**).

#### DOSAGE AND ADMINISTRATION

**Bipolar Disorder Depression Usual Dose:** SEROQUEL should be administered once daily at bedtime to reach 300 mg/day by day 4.

##### Recommended Dosing Schedule

| Day      | Day 1 | Day 2  | Day 3  | Day 4  |
|----------|-------|--------|--------|--------|
| SEROQUEL | 50 mg | 100 mg | 200 mg | 300 mg |

In these clinical trials supporting effectiveness, the dosing schedule was 50 mg, 100 mg, 200 mg and 300 mg/day for days 1-4 respectively. Patients receiving 600 mg increased to 400 mg on day 5 and 600 mg on day 8 (Week 1). Antidepressant efficacy was demonstrated with SEROQUEL at both 300 mg and 600 mg however, no additional benefit was seen in the 600 mg group. **Mania Usual Dose:** When used as monotherapy or adjunct therapy (with lithium or divalproex), SEROQUEL should be initiated in bid doses totaling 100 mg/day on Day 1, increased to 400 mg/day on Day 4 in increments of up to 100 mg/day in bid divided doses. Further dosage adjustments up to 800 mg/day by Day 6 should be in increments of no greater than 200 mg/day. Data indicate that the majority of patients responded between 400 to 800 mg/day. The safety of doses above 800 mg/day has not been evaluated in clinical trials. **Maintenance** Maintenance of efficacy in Bipolar I Disorder was demonstrated with SEROQUEL (administered twice daily totalling 400 to 800 mg per day) as adjunct therapy to lithium or divalproex. Generally, in the maintenance phase, patients continued on the same dose on which they were stabilized during the stabilization phase [see **Clinical Studies** in full Prescribing Information (14)]. **Schizophrenia Usual Dose:** SEROQUEL should generally be administered with an initial dose of 25 mg bid, with increases in increments of 25-50 mg bid or tid on the second and third day, as tolerated, to a target dose range of 300 to 400 mg daily by the fourth day, given bid

or tid. Further dosage adjustments, if indicated, should generally occur at intervals of not less than 2 days, as steady-state for SEROQUEL would not be achieved for approximately 1-2 days in the typical patient. When dosage adjustments are necessary, dose increments/decrements of 25-50 mg bid are recommended. Most efficacy data with SEROQUEL were obtained using tid regimens, but in one controlled trial 225 mg twice per day was also effective. Efficacy in schizophrenia was demonstrated in a dose range of 150 to 750 mg/day in the clinical trials supporting the effectiveness of SEROQUEL. In a dose response study, doses above 300 mg/day were not demonstrated to be more efficacious than the 300 mg/day dose. In other studies, however, doses in the range of 400-500 mg/day appeared to be needed. The safety of doses above 800 mg/day has not been evaluated in clinical trials. **Dosing in Special Populations** Consideration should be given to a slower rate of dose titration and a lower target dose in the elderly and in patients who are debilitated or who have a predisposition to hypotensive reactions [see **Clinical Pharmacology** in full Prescribing Information (12)]. When indicated, dose escalation should be performed with caution in these patients. Patients with hepatic impairment should be started on 25 mg/day. The dose should be increased daily in increments of 25-50 mg/day to an effective dose, depending on the clinical response and tolerability of the patient. The elimination of quetiapine was enhanced in the presence of phenytoin. Higher maintenance doses of quetiapine may be required when it is coadministered with phenytoin and other enzyme inducers such as carbamazepine and phenobarbital (see **Drug Interactions**). **Maintenance Treatment** While there is no body of evidence available to answer the question of how long the patient treated with SEROQUEL should be maintained, it is generally recommended that responding patients be continued beyond the acute response, but at the lowest dose needed to maintain remission. Patients should be periodically reassessed to determine the need for maintenance treatment. **Reinitiation of Treatment in Patients Previously Discontinued** Although there are no data to specifically address reinitiation of treatment, it is recommended that when restarting patients who have had an interval of less than one week off SEROQUEL, titration of SEROQUEL is not required and the maintenance dose may be reinitiated. When restarting therapy of patients who have been off SEROQUEL for more than one week, the initial titration schedule should be followed. **Switching from Antipsychotics** There are no systematically collected data to specifically address switching patients with schizophrenia from antipsychotics to SEROQUEL, or concerning concomitant administration with antipsychotics. While immediate discontinuation of the previous antipsychotic treatment may be acceptable for some patients with schizophrenia, more gradual discontinuation may be most appropriate for others. In all cases, the period of overlapping antipsychotic administration should be minimized. When switching patients with schizophrenia from depot antipsychotics, if medically appropriate, initiate SEROQUEL therapy in place of the next scheduled injection. The need for continuing existing EPS medication should be reevaluated periodically.

#### CONTRAINDICATIONS

None known

#### WARNINGS AND PRECAUTIONS

**Increased Mortality in Elderly Patients with Dementia-Related Psychosis** Elderly patients with dementia-related psychosis treated with atypical antipsychotic drugs are at an increased risk of death compared to placebo. SEROQUEL (quetiapine fumarate) is not approved for the treatment of patients with dementia-related psychosis (see **Boxed Warning**). **Clinical Worsening and Suicide Risk** Patients with major depressive disorder (MDD), both adult and pediatric, may experience worsening of their depression and/or the emergence of suicidal ideation and behavior (suicidality) or unusual changes in behavior, whether or not they are taking antidepressant medications, and this risk may persist until significant remission occurs. Suicide is a known risk of depression and certain other psychiatric disorders, and these disorders themselves are the strongest predictors of suicide. There has been a long-standing concern, however, that antidepressants may have a role in inducing worsening of depression and the emergence of suicidality in certain patients during the early phases of treatment. Pooled analyses of short-term placebo-controlled trials of antidepressant drugs (SSRIs and others) showed that these drugs increase the risk of suicidal thinking and behavior (suicidality) in children, adolescents, and young adults (ages 18-24) with major depressive disorder (MDD) and other psychiatric disorders. Short-term studies did not show an increase in the risk of suicidality with antidepressants compared to placebo in adults beyond age 24; there was a reduction with antidepressants compared to placebo in adults aged 65 and older. The pooled analyses of placebo-controlled trials in children and adolescents with MDD, obsessive compulsive disorder (OCD), or other psychiatric disorders included a total of 24 short-term trials of 9 antidepressant drugs in over 4400 patients. The pooled analyses of placebo-controlled trials in adults with MDD or other psychiatric disorders included a total of 295 short-term trials (median duration of 2 months) of 11 antidepressant drugs in over 77,000 patients. There was considerable variation in risk of suicidality among drugs, but a tendency toward an increase in the younger patients for almost all drugs studied. There were differences in absolute risk of suicidality across the different indications, with the highest incidence in MDD. The risk differences (drug vs. placebo), however, were relatively stable within age strata and across indications. These risk differences (drug-placebo difference in the number of cases of suicidality per 1000 patients treated) are provided in Table 1.

Table 1

| Age Range | Drug-Placebo Difference in Number of Cases of Suicidality per 1000 Patients Treated |
|-----------|-------------------------------------------------------------------------------------|
|           | <b>Increases Compared to Placebo</b>                                                |
| <18       | 14 additional cases                                                                 |
| 18-24     | 5 additional cases                                                                  |
|           | <b>Decreases Compared to Placebo</b>                                                |
| 25-64     | 1 fewer case                                                                        |
| ≥65       | 6 fewer cases                                                                       |

No suicides occurred in any of the pediatric trials. There were suicides in the adult trials, but the number was not sufficient to reach any conclusion about drug effect on suicide. It is unknown whether the suicidality risk extends to longer-term use, i.e., beyond several months. However, there is substantial evidence from placebo-controlled maintenance trials in adults with depression that the use of antidepressants can delay the recurrence of depression. **All patients being treated with antidepressants for any indication should be monitored appropriately and observed closely for clinical worsening, suicidality, and unusual changes**

in behavior, especially during the initial few months of a course of drug therapy, or at times of dose changes, either increases or decreases. The following symptoms, anxiety, agitation, panic attacks, insomnia, irritability, hostility, aggressiveness, impulsivity, akathisia (psychomotor restlessness), hypomania, and mania, have been reported in adult and pediatric patients being treated with antidepressants for major depressive disorder as well as for other indications, both psychiatric and nonpsychiatric. Although a causal link between the emergence of such symptoms and either the worsening of depression and/or the emergence of suicidal impulses has not been established, there is concern that such symptoms may represent precursors to emerging suicidality. Consideration should be given to changing the therapeutic regimen, including possibly discontinuing the medication, in patients whose depression is persistently worse, or who are experiencing emergent suicidality or symptoms that might be precursors to worsening depression or suicidality, especially if these symptoms are severe, abrupt in onset, or were not part of the patient's presenting symptoms. **Families and caregivers of patients being treated with antidepressants for major depressive disorder or other indications, both psychiatric and nonpsychiatric, should be alerted about the need to monitor patients for the emergence of agitation, irritability, unusual changes in behavior, and the other symptoms described above, as well as the emergence of suicidality, and to report such symptoms immediately to health care providers. Such monitoring should include daily observation by families and caregivers.** Prescriptions for SEROQUEL should be written for the smallest quantity of tablets consistent with good patient management, in order to reduce the risk of overdose.

**Screening Patients for Bipolar Disorder:** A major depressive episode may be the initial presentation of bipolar disorder. It is generally believed (though not established in controlled trials) that treating such an episode with an antidepressant alone may increase the likelihood of precipitation of a mixed/manic episode in patients at risk for bipolar disorder. Whether any of the symptoms described above represent such a conversion is unknown. However, prior to initiating treatment with an antidepressant, patients with depressive symptoms should be adequately screened to determine if they are at risk for bipolar disorder; such screening should include a detailed psychiatric history, including a family history of suicide, bipolar disorder, and depression. It should be noted that SEROQUEL is approved for use in treating adult bipolar depression. **Hyperglycemia and Diabetes Mellitus** Hyperglycemia, in some cases extreme and associated with ketoacidosis or hyperosmolar coma or death, has been reported in patients treated with atypical antipsychotics, including quetiapine (see **Adverse Reactions, Hyperglycemia**). Assessment of the relationship between atypical antipsychotic use and glucose abnormalities is complicated by the possibility of an increased background risk of diabetes mellitus in patients with schizophrenia and the increasing incidence of diabetes mellitus in the general population. Given these confounders, the relationship between atypical antipsychotic use and hyperglycemia-related adverse reactions is not completely understood. However, epidemiological studies suggest an increased risk of treatment-emergent hyperglycemia-related adverse reactions in patients treated with the atypical antipsychotics. Precise risk estimates for hyperglycemia-related adverse reactions in patients treated with atypical antipsychotics are not available. Patients with an established diagnosis of diabetes mellitus who are started on atypical antipsychotics should be monitored regularly for worsening of glucose control. Patients with risk factors for diabetes mellitus (eg, obesity, family history of diabetes) who are starting treatment with atypical antipsychotics should undergo fasting blood glucose testing at the beginning of treatment and periodically during treatment. Any patient treated with atypical antipsychotics should be monitored for symptoms of hyperglycemia including polydipsia, polyuria, polyphagia, and weakness. Patients who develop symptoms of hyperglycemia during treatment with atypical antipsychotics should undergo fasting blood glucose testing. In some cases, hyperglycemia has resolved when the atypical antipsychotic was discontinued; however, some patients required continuation of anti-diabetic treatment despite discontinuation of the suspect drug. **Neuroleptic Malignant Syndrome (NMS)** A potentially fatal symptom complex sometimes referred to as Neuroleptic Malignant Syndrome (NMS) has been reported in association with administration of antipsychotic drugs, including SEROQUEL. Rare cases of NMS have been reported with SEROQUEL. Clinical manifestations of NMS are hyperpyrexia, muscle rigidity, altered mental status, and evidence of autonomic instability (irregular pulse or blood pressure, tachycardia, diaphoresis, and cardiac dysrhythmia). Additional signs may include elevated creatine phosphokinase, myoglobinuria (rhabdomyolysis) and acute renal failure. The diagnostic evaluation of patients with this syndrome is complicated. In arriving at a diagnosis, it is important to exclude cases where the clinical presentation includes both serious medical illness (eg, pneumonia, systemic infection, etc.) and untreated or inadequately treated extrapyramidal signs and symptoms (EPS). Other important considerations in the differential diagnosis include central anticholinergic toxicity, heat stroke, drug fever and primary central nervous system (CNS) pathology. The management of NMS should include: 1) immediate discontinuation of antipsychotic drugs and other drugs not essential to concurrent therapy; 2) intensive symptomatic treatment and medical monitoring; and 3) treatment of any concomitant serious medical problems for which specific treatments are available. There is no general agreement about specific pharmacological treatment regimens for NMS. If a patient requires antipsychotic drug treatment after recovery from NMS, the potential reintroduction of drug therapy should be carefully considered. The patient should be carefully monitored since recurrences of NMS have been reported. **Orthostatic Hypotension** SEROQUEL may induce orthostatic hypotension associated with dizziness, tachycardia and, in some patients, syncope, especially during the initial dose-titration period, probably reflecting its  $\alpha_1$ -adrenergic antagonist properties. Syncope was reported in 1% (28/3265) of the patients treated with SEROQUEL, compared with 0.2% (2/954) on placebo and about 0.4% (2/527) on active control drugs. SEROQUEL should be used with particular caution in patients with known cardiovascular disease (history of myocardial infarction or ischemic heart disease, heart failure or conduction abnormalities), cerebrovascular disease or conditions which would predispose patients to hypotension (dehydration, hypovolemia and treatment with antihypertensive medications). The risk of orthostatic hypotension and syncope may be minimized by limiting the initial dose to 25 mg bid (see **Dosage and Administration**). If hypotension occurs during titration to the target dose, a return to the previous dose in the titration schedule is appropriate.

**Leukopenia, Neutropenia and Agranulocytosis** In clinical trial and postmarketing experience, events of leukopenia/neutropenia have been reported temporally related to atypical antipsychotic agents, including SEROQUEL. Agranulocytosis (including fatal cases) has also been reported. Possible risk factors for leukopenia/neutropenia include pre-existing low white cell count (WBC) and history of drug induced leukopenia/neutropenia. Patients with a pre-existing low WBC or a history of drug induced leukopenia/neutropenia should have their complete blood count (CBC) monitored frequently during the first few months of therapy and should discontinue SEROQUEL at the first sign of a decline in WBC in absence of other causative factors. Patients with neutropenia should be carefully monitored for fever or other symptoms or

signs of infection and treated promptly if such symptoms or signs occur. Patients with severe neutropenia (absolute neutrophil count  $<1000/\text{mm}^3$ ) should discontinue SEROQUEL and have their WBC followed until recovery (see **Adverse Reactions**). **Tardive Dyskinesia** A syndrome of potentially irreversible, involuntary, dyskinetic movements may develop in patients treated with antipsychotic drugs. Although the prevalence of the syndrome appears to be highest among the elderly, especially elderly women, it is impossible to rely upon prevalence estimates to predict, at the inception of antipsychotic treatment, which patients are likely to develop the syndrome. Whether antipsychotic drug products differ in their potential to cause tardive dyskinesia is unknown. The risk of developing tardive dyskinesia and the likelihood that it will become irreversible are believed to increase as the duration of treatment and the total cumulative dose of antipsychotic drugs administered to the patient increase. However, the syndrome can develop, although much less commonly, after relatively brief treatment periods at low doses. There is no known treatment for established cases of tardive dyskinesia, although the syndrome may remit, partially or completely, if antipsychotic treatment is withdrawn. Antipsychotic treatment, itself, however, may suppress (or partially suppress) the signs and symptoms of the syndrome and thereby may possibly mask the underlying process. The effect that symptomatic suppression has upon the long-term course of the syndrome is unknown. Given these considerations, SEROQUEL should be prescribed in a manner that is most likely to minimize the occurrence of tardive dyskinesia. Chronic antipsychotic treatment should generally be reserved for patients who appear to suffer from a chronic illness that (1) is known to respond to antipsychotic drugs, and (2) for whom alternative, equally effective, but potentially less harmful treatments are not available or appropriate. In patients who do require chronic treatment, the smallest dose and the shortest duration of treatment producing a satisfactory clinical response should be sought. The need for continued treatment should be reassessed periodically. If signs and symptoms of tardive dyskinesia appear in a patient on SEROQUEL, drug discontinuation should be considered. However, some patients may require treatment with SEROQUEL despite the presence of the syndrome. **Cataracts** The development of cataracts was observed in association with quetiapine treatment in chronic dog studies [see **Nonclinical Toxicology, Animal Toxicology** in full Prescribing Information (13.2)]. Lens changes have also been observed in patients during long-term SEROQUEL treatment, but a causal relationship to SEROQUEL use has not been established. Nevertheless, the possibility of lenticular changes cannot be excluded at this time. Therefore, examination of the lens by methods adequate to detect cataract formation, such as slit lamp exam or other appropriately sensitive methods, is recommended at initiation of treatment or shortly thereafter, and at 6-month intervals during chronic treatment. **Seizures** During clinical trials, seizures occurred in 0.5% (20/3490) of patients treated with SEROQUEL compared to 0.2% (2/954) on placebo and 0.7% (4/527) on active control drugs. As with other antipsychotics, SEROQUEL should be used cautiously in patients with a history of seizures or with conditions that potentially lower the seizure threshold, eg, Alzheimer's dementia. Conditions that lower the seizure threshold may be more prevalent in a population of 65 years or older. **Hypothyroidism** Clinical trials with SEROQUEL demonstrated a dose-related decrease in total and free thyroxine (T4) of approximately 20% at the higher end of the therapeutic dose range and was maximal in the first two to four weeks of treatment and maintained without adaptation or progression during more chronic therapy. Generally, these changes were of no clinical significance and TSH was unchanged in most patients and levels of TBG were unchanged. In nearly all cases, cessation of SEROQUEL treatment was associated with a reversal of the effects on total and free T4, irrespective of the duration of treatment. About 0.7% (26/3489) of SEROQUEL patients did experience TSH increases in monotherapy studies. Six of the patients with TSH increases needed replacement thyroid treatment. In the mania adjunct studies, where SEROQUEL was added to lithium or divalproex, 12% (24/196) of SEROQUEL treated patients compared to 7% (15/203) of placebo treated patients had elevated TSH levels. Of the SEROQUEL treated patients with elevated TSH levels, 3 had simultaneous low free T4 levels. **Hyperlipidemia** In schizophrenia trials, the proportions of patients with elevations to levels of cholesterol  $\geq 240$  mg/dL and triglycerides  $\geq 200$  mg/dL were 16% and 23% for SEROQUEL treated patients respectively compared to 7% and 16% for placebo treated patients respectively. In bipolar depression trials, the proportion of patients with cholesterol and triglycerides elevations to these levels were 9% and 14% for SEROQUEL treated patients respectively, compared to 6% and 9% for placebo treated patients respectively. **Hyperprolactinemia** Although an elevation of prolactin levels was not demonstrated in clinical trials with SEROQUEL, increased prolactin levels were observed in rat studies with this compound, and were associated with an increase in mammary gland neoplasia in rats [see **Carcinogenesis, Mutagenesis, Impairment of Fertility** in full Prescribing Information (13.1)]. Tissue culture experiments indicate that approximately one-third of human breast cancers are prolactin dependent *in vitro*, a factor of potential importance if the prescription of these drugs is contemplated in a patient with previously detected breast cancer. Although disturbances such as galactorrhea, amenorrhea, gynecomastia, and impotence have been reported with prolactin-elevating compounds, the clinical significance of elevated serum prolactin levels is unknown for most patients. Neither clinical studies nor epidemiologic studies conducted to date have shown an association between chronic administration of this class of drugs and tumorigenesis in humans; the available evidence is considered too limited to be conclusive at this time. **Transaminase Elevations** Asymptomatic, transient and reversible elevations in serum transaminases (primarily ALT) have been reported. In schizophrenia trials, the proportions of patients with transaminase elevations of  $>3$  times the upper limits of the normal reference range in a pool of 3- to 6-week placebo-controlled trials were approximately 6% for SEROQUEL compared to 1% for placebo. In acute bipolar mania trials, the proportions of patients with transaminase elevations of  $>3$  times the upper limits of the normal reference range in a pool of 3- to 12-week placebo-controlled trials were approximately 1% for both SEROQUEL and placebo. These hepatic enzyme elevations usually occurred within the first 3 weeks of drug treatment and promptly returned to pre-study levels with ongoing treatment with SEROQUEL. In bipolar depression trials, the proportions of patients with transaminase elevations of  $>3$  times the upper limits of the normal reference range in two 8-week placebo-controlled trials was 1% for SEROQUEL and 2% for placebo. **Potential for Cognitive and Motor Impairment** Somnolence was a commonly reported adverse event reported in patients treated with SEROQUEL especially during the 3-5 day period of initial dose titration. In schizophrenia trials, somnolence was reported in 18% of patients on SEROQUEL compared to 11% of placebo patients. In acute bipolar mania trials using SEROQUEL as monotherapy, somnolence was reported in 16% of patients on SEROQUEL compared to 4% of placebo patients. In acute bipolar mania trials using SEROQUEL as adjunct therapy, somnolence was reported in 34% of patients on SEROQUEL compared to 9% of placebo patients. In bipolar depression trials, somnolence was reported in 28% of patients on SEROQUEL compared to 7% of placebo patients. In these trials, sedation was reported in 30% of patients on SEROQUEL compared to 8% of placebo patients. Since SEROQUEL has the potential to impair judgment,



thinking, or motor skills, patients should be cautioned about performing activities requiring mental alertness, such as operating a motor vehicle (including automobiles) or operating hazardous machinery until they are reasonably certain that SEROQUEL therapy does not affect them adversely. **Priapism** One case of priapism in a patient receiving SEROQUEL has been reported prior to market introduction. While a causal relationship to use of SEROQUEL has not been established, other drugs with alpha-adrenergic blocking effects have been reported to induce priapism, and it is possible that SEROQUEL may share this capacity. Severe priapism may require surgical intervention. **Body Temperature Regulation** Although not reported with SEROQUEL, disruption of the body's ability to reduce core body temperature has been attributed to antipsychotic agents. Appropriate care is advised when prescribing SEROQUEL for patients who will be experiencing conditions which may contribute to an elevation in core body temperature, e.g., exercising strenuously, exposure to extreme heat, receiving concomitant medication with anticholinergic activity, or being subject to dehydration. **Dysphagia** Esophageal dysmotility and aspiration have been associated with antipsychotic drug use. Aspiration pneumonia is a common cause of morbidity and mortality in elderly patients, in particular those with advanced Alzheimer's dementia. SEROQUEL and other antipsychotic drugs should be used cautiously in patients at risk for aspiration pneumonia. **Suicide** The possibility of a suicide attempt is inherent in bipolar disorder and schizophrenia; close supervision of high risk patients should accompany drug therapy. Prescriptions for SEROQUEL should be written for the smallest quantity of tablets consistent with good patient management in order to reduce the risk of overdose. In 2 eight-week clinical studies in patients with bipolar depression (N=1048) the incidence of treatment emergent suicidal ideation or suicide attempt was low and similar to placebo (SEROQUEL 300 mg, 6/350, 1.7%; SEROQUEL 600 mg, 9/348, 2.6%; Placebo, 7/347, 2.0%). **Use in Patients with Concomitant Illness** Clinical experience with SEROQUEL in patients with certain concomitant systemic illnesses is limited [see **Pharmacokinetics** in full Prescribing Information (12.3)]. SEROQUEL has not been evaluated or used to any appreciable extent in patients with a recent history of myocardial infarction or unstable heart disease. Patients with these diagnoses were excluded from premarketing clinical studies. Because of the risk of orthostatic hypotension with SEROQUEL, caution should be observed in cardiac patients (see **Warnings and Precautions**). **Withdrawal** Acute withdrawal symptoms, such as nausea, vomiting, and insomnia have very rarely been described after abrupt cessation of atypical antipsychotic drugs, including SEROQUEL. Gradual withdrawal is advised.

## ADVERSE REACTIONS

**Clinical Study Experience** Because clinical studies are conducted under widely varying conditions, adverse reaction rates observed in the clinical studies of a drug cannot be directly compared to rates in the clinical studies of another drug and may not reflect the rates observed in practice. The information below is derived from a clinical trial database for SEROQUEL consisting of over 4300 patients. This database includes 698 patients exposed to SEROQUEL for the treatment of bipolar depression, 405 patients exposed to SEROQUEL for the treatment of acute bipolar mania (monotherapy and adjunct therapy), 646 patients exposed to SEROQUEL for the maintenance treatment of bipolar I disorder as adjunct therapy, and approximately 2600 patients and/or normal subjects exposed to 1 or more doses of SEROQUEL for the treatment of schizophrenia. Of these approximately 4300 subjects, approximately 4000 (2300 in schizophrenia, 405 in acute bipolar mania, 698 in bipolar depression, and 646 for the maintenance treatment of bipolar I disorder) were patients who participated in multiple dose effectiveness trials, and their experience corresponded to approximately 2400 patient-years. The conditions and duration of treatment with SEROQUEL varied greatly and included (in overlapping categories) open-label and double-blind phases of studies, inpatients and outpatients, fixed-dose and dose-titration studies, and short-term or longer-term exposure. Adverse reactions were assessed by collecting adverse events, results of physical examinations, vital signs, weights, laboratory analyses, ECGs, and results of ophthalmologic examinations. Adverse reactions during exposure were obtained by general inquiry and recorded by clinical investigators using terminology of their own choosing. Consequently, it is not possible to provide a meaningful estimate of the proportion of individuals experiencing adverse reactions without first grouping similar types of reactions into a smaller number of standardized reaction categories. In the tables and tabulations that follow, standard COSTART terminology has been used to classify reported adverse reactions for schizophrenia and bipolar mania. MedDRA terminology has been used to classify reported adverse reactions for bipolar depression. The stated frequencies of adverse reactions represent the proportion of individuals who experienced, at least once, a treatment-emergent adverse reaction of the type listed. A reaction was considered treatment emergent if it occurred for the first time or worsened while receiving therapy following baseline evaluation.

**Adverse Reactions Associated with Discontinuation of Treatment in Short-Term, Placebo-Controlled Trials: Bipolar Disorder: Depression:** Overall, discontinuations due to adverse reactions were 12.3% for SEROQUEL 300 mg vs. 19.0% for SEROQUEL 600 mg and 5.2% for placebo. **Mania:** Overall, discontinuations due to adverse reactions were 5.7% for SEROQUEL vs. 5.1% for placebo in monotherapy and 3.6% for SEROQUEL vs. 5.9% for placebo in adjunct therapy. **Schizophrenia:** Overall, there was little difference in the incidence of discontinuation due to adverse reactions (4% for SEROQUEL vs. 3% for placebo) in a pool of controlled trials. However, discontinuations due to somnolence and hypotension were considered to be drug related (see **Warnings and Precautions**).

| Adverse Reaction | SEROQUEL | Placebo |
|------------------|----------|---------|
| Somnolence       | 0.8%     | 0%      |
| Hypotension      | 0.4%     | 0%      |

**Adverse Reactions Occurring at an Incidence of 1% or More Among SEROQUEL Treated Patients in Short-Term, Placebo-Controlled Trials:** The prescriber should be aware that the figures in the tables and tabulations cannot be used to predict the incidence of side effects in the course of usual medical practice where patient characteristics and other factors differ from those that prevailed in the clinical trials. Similarly, the cited frequencies cannot be compared with figures obtained from other clinical investigations involving different treatments, uses, and investigators. The cited figures, however, do provide the prescribing physician with some basis for estimating the relative contribution of drug and nondrug factors to the side effect incidence in the population studied. Table 2 enumerates the incidence, rounded to the nearest percent, of treatment-emergent adverse reactions that occurred during acute therapy of schizophrenia (up to 6 weeks) and bipolar mania (up to 12 weeks) in 1% or more of patients treated with SEROQUEL (doses ranging from 75 to 800 mg/day) where the incidence in patients treated with SEROQUEL was greater than the incidence in placebo-treated patients.

**Table 2. Treatment-Emergent Adverse Reaction Incidence in 3- to 12-Week Placebo-Controlled Clinical Trials for the Treatment of Schizophrenia and Bipolar Mania (monotherapy)<sup>1</sup>**

| Body System/Preferred Term              | SEROQUEL (n=719) | PLACEBO (n=404) |
|-----------------------------------------|------------------|-----------------|
| <b>Body as a Whole</b>                  |                  |                 |
| Headache                                | 21%              | 14%             |
| Pain                                    | 7%               | 5%              |
| Asthenia                                | 5%               | 3%              |
| Abdominal Pain                          | 4%               | 1%              |
| Back Pain                               | 3%               | 1%              |
| Fever                                   | 2%               | 1%              |
| <b>Cardiovascular</b>                   |                  |                 |
| Tachycardia                             | 6%               | 4%              |
| Postural Hypotension                    | 4%               | 1%              |
| <b>Digestive</b>                        |                  |                 |
| Dry Mouth                               | 9%               | 3%              |
| Constipation                            | 8%               | 3%              |
| Vomiting                                | 6%               | 5%              |
| Dyspepsia                               | 5%               | 1%              |
| Gastroenteritis                         | 2%               | 0%              |
| Gamma Glutamyl Transpeptidase Increased | 1%               | 0%              |
| <b>Metabolic and Nutritional</b>        |                  |                 |
| Weight Gain                             | 5%               | 1%              |
| SGPT Increased                          | 5%               | 1%              |
| SGOT Increased                          | 3%               | 1%              |
| <b>Nervous</b>                          |                  |                 |
| Agitation                               | 20%              | 17%             |
| Somnolence                              | 18%              | 8%              |
| Dizziness                               | 11%              | 5%              |
| Anxiety                                 | 4%               | 3%              |
| <b>Respiratory</b>                      |                  |                 |
| Pharyngitis                             | 4%               | 3%              |
| Rhinitis                                | 3%               | 1%              |
| <b>Skin and Appendages</b>              |                  |                 |
| Rash                                    | 4%               | 2%              |
| <b>Special Senses</b>                   |                  |                 |
| Amblyopia                               | 2%               | 1%              |

<sup>1</sup> Reactions for which the SEROQUEL incidence was equal to or less than placebo are not listed in the table, but included the following: accidental injury, akathisia, chest pain, cough increased, depression, diarrhea, extrapyramidal syndrome, hostility, hypertension, hypertonia, hypotension, increased appetite, infection, insomnia, leukopenia, malaise, nausea, nervousness, paresis, peripheral edema, sweating, tremor, and weight loss.

In these studies, the most commonly observed adverse reactions associated with the use of SEROQUEL (incidence of 5% or greater) and observed at a rate on SEROQUEL at least twice that of placebo were somnolence (18%), dizziness (11%), dry mouth (9%), constipation (8%), SGPT increased (5%), weight gain (5%), and dyspepsia (5%). Table 3 enumerates the incidence, rounded to the nearest percent, of treatment-emergent adverse reactions that occurred during therapy (up to 3 weeks) of acute mania in 5% or more of patients treated with SEROQUEL (doses ranging from 100 to 800 mg/day) used as adjunct therapy to lithium and divalproex where the incidence in patients treated with SEROQUEL was greater than the incidence in placebo-treated patients.

**Table 3. Treatment-Emergent Adverse Reaction Incidence in 3-Week Placebo-Controlled Clinical Trials for the Treatment of Bipolar Mania (Adjunct Therapy)<sup>1</sup>**

| Body System/Preferred Term       | SEROQUEL (n=196) | PLACEBO (n=203) |
|----------------------------------|------------------|-----------------|
| <b>Body as a Whole</b>           |                  |                 |
| Headache                         | 17%              | 13%             |
| Asthenia                         | 10%              | 4%              |
| Abdominal Pain                   | 7%               | 3%              |
| Back Pain                        | 5%               | 3%              |
| <b>Cardiovascular</b>            |                  |                 |
| Postural Hypotension             | 7%               | 2%              |
| <b>Digestive</b>                 |                  |                 |
| Dry Mouth                        | 19%              | 3%              |
| Constipation                     | 10%              | 5%              |
| <b>Metabolic and Nutritional</b> |                  |                 |
| Weight Gain                      | 6%               | 3%              |
| <b>Nervous</b>                   |                  |                 |
| Somnolence                       | 34%              | 9%              |
| Dizziness                        | 9%               | 6%              |
| Tremor                           | 8%               | 7%              |
| Agitation                        | 6%               | 4%              |
| <b>Respiratory</b>               |                  |                 |
| Pharyngitis                      | 6%               | 3%              |

<sup>1</sup> Reactions for which the SEROQUEL incidence was equal to or less than placebo are not listed in the table, but included the following: akathisia, diarrhea, insomnia, and nausea.

In these studies, the most commonly observed adverse reactions associated with the use of SEROQUEL (incidence of 5% or greater) and observed at a rate on SEROQUEL at least twice that of placebo were somnolence (34%), dry mouth (19%), asthenia (10%), constipation (10%), abdominal pain (7%), postural hypotension (7%), pharyngitis (6%), and weight gain (6%). Table 4 enumerates the incidence, rounded to the nearest percent, of treatment-emergent adverse reactions that occurred during therapy (up to 8 weeks)

of bipolar depression in 5% or more of patients treated with SEROQUEL (doses of 300 and 600 mg/day) where the incidence in patients treated with SEROQUEL was greater than the incidence in placebo treated patients.

**Table 4. Treatment-Emergent Adverse Reaction Incidence in 8-Week Placebo-Controlled Clinical Trials for the Treatment of Bipolar Depression<sup>1</sup>**

| Body System/Preferred Term                                  | SEROQUEL (n=698) | PLACEBO (n=347) |
|-------------------------------------------------------------|------------------|-----------------|
| <b>Gastrointestinal Disorders</b>                           |                  |                 |
| Dry Mouth                                                   | 44%              | 13%             |
| Constipation                                                | 10%              | 4%              |
| Dyspepsia                                                   | 7%               | 4%              |
| Vomiting                                                    | 5%               | 4%              |
| <b>General Disorders and Administrative Site Conditions</b> |                  |                 |
| Fatigue                                                     | 10%              | 8%              |
| <b>Metabolism and Nutrition Disorders</b>                   |                  |                 |
| Increased Appetite                                          | 5%               | 3%              |
| <b>Nervous System Disorders</b>                             |                  |                 |
| Sedation                                                    | 30%              | 8%              |
| Somnolence                                                  | 28%              | 7%              |
| Dizziness                                                   | 18%              | 7%              |
| Lethargy                                                    | 5%               | 2%              |
| <b>Respiratory, Thoracic, and Mediastinal Disorders</b>     |                  |                 |
| Nasal Congestion                                            | 5%               | 3%              |

<sup>1</sup> Reactions for which the SEROQUEL incidence was equal to or less than placebo are not listed in the table, but included the following: nausea, upper respiratory tract infection, and headache.

In these studies, the most commonly observed adverse reactions associated with the use of SEROQUEL (incidence of 5% or greater) and observed at a rate on SEROQUEL at least twice that of placebo were dry mouth (44%), sedation (30%), somnolence (28%), dizziness (18%), constipation (10%), lethargy (5%), and nasal congestion (5%). Explorations for interactions on the basis of gender, age, and race did not reveal any clinically meaningful differences in the adverse reaction occurrence on the basis of these demographic factors. **Dose Dependency of Adverse Reactions in Short-Term, Placebo-Controlled Trials** Dose-related Adverse Reactions: Spontaneously elicited adverse reaction data from a study of schizophrenia comparing five fixed doses of SEROQUEL (75 mg, 150 mg, 300 mg, 600 mg, and 750 mg/day) to placebo were explored for dose-relatedness of adverse reactions. Logistic regression analyses revealed a positive dose response ( $p < 0.05$ ) for the following adverse reactions: dyspepsia, abdominal pain, and weight gain. **Adverse Reactions in clinical trials with quetiapine and not listed elsewhere in the label:** The following adverse reactions have also been reported with quetiapine: abnormal dreams and nightmares, hypersensitivity, restless legs syndrome, and elevations in serum creatine phosphokinase (not associated with NMS). **Extrapyramidal Symptoms: Dystonia: Class Effect:** Symptoms of dystonia, prolonged abnormal contractions of muscle groups, may occur in susceptible individuals during the first few days of treatment. Dystonic symptoms include: spasm of the neck muscles, sometimes progressing to tightness of the throat, swallowing difficulty, difficulty breathing, and/or protrusion of the tongue. While these symptoms can occur at low doses, they occur more frequently and with greater severity with high potency and at higher doses of first generation antipsychotic drugs. An elevated risk of acute dystonia is observed in males and younger age groups. Data from one 6-week clinical trial of schizophrenia comparing five fixed doses of SEROQUEL (75, 150, 300, 600, 750 mg/day) provided evidence for the lack of treatment-emergent extrapyramidal symptoms (EPS) and dose-relatedness for EPS associated with SEROQUEL treatment. Three methods were used to measure EPS: (1) Simpson-Angus total score (mean change from baseline) which evaluates Parkinsonism and akathisia, (2) incidence of spontaneous complaints of EPS (akathisia, akinesia, cogwheel rigidity, extrapyramidal syndrome, hypertonia, hypokinesia, neck rigidity, and tremor), and (3) use of anticholinergic medications to treat emergent EPS.

#### SEROQUEL

| Dose Groups                 | Placebo | 75 mg | 150 mg | 300 mg | 600 mg | 750 mg |
|-----------------------------|---------|-------|--------|--------|--------|--------|
| Parkinsonism                | -0.6    | -1.0  | -1.2   | -1.6   | -1.8   | -1.8   |
| EPS incidence               | 16%     | 6%    | 6%     | 4%     | 8%     | 6%     |
| Anticholinergic medications | 14%     | 11%   | 10%    | 8%     | 12%    | 11%    |

In six additional placebo-controlled clinical trials (3 in acute mania and 3 in schizophrenia) using variable doses of SEROQUEL, there were no differences between the SEROQUEL and placebo treatment groups in the incidence of EPS, as assessed by Simpson-Angus scores, spontaneous complaints of EPS and the use of concomitant anticholinergic medications to treat EPS. In two placebo-controlled clinical trials for the treatment of bipolar depression using 300 mg and 600 mg of SEROQUEL, the incidence of adverse reactions potentially related to EPS was 12% in both dose groups and 6% in the placebo group. In these studies, the incidence of the individual adverse reactions (eg, akathisia, extrapyramidal disorder, tremor, dyskinesia, dystonia, restlessness, muscle contractions involuntary, psychomotor hyperactivity and muscle rigidity) were generally low and did not exceed 4% in any treatment group. The 3 treatment groups were similar in mean change in SAS total score and BARS Global Assessment score at the end of treatment. The use of concomitant anticholinergic medications was infrequent and similar across the three treatment groups. **Vital Signs and Laboratory Studies** Vital Sign Changes SEROQUEL is associated with orthostatic hypotension [see **Warnings and Precautions**]. **Weight Gain** In schizophrenia trials the proportions of patients meeting a weight gain criterion of  $\geq 7\%$  of body weight were compared in a pool of four 3- to 6-week placebo-controlled clinical trials, revealing a statistically significantly greater incidence of weight gain for SEROQUEL (23%) compared to placebo (6%). In mania monotherapy trials the proportions of patients meeting the same weight gain criterion were 21% compared to 7% for placebo and in mania adjunct therapy trials the proportion of patients meeting the same weight gain criterion were 13% compared to 4% for placebo. In bipolar depression trials, the proportions of patients meeting the same weight gain criterion were 8% compared to 2% for placebo. **Laboratory Changes** An assessment of the premarketing experience for SEROQUEL suggested that it is associated with asymptomatic increases in SGPT and increases in both total

cholesterol and triglycerides. In post-marketing clinical trials, elevations in total cholesterol (predominantly LDL cholesterol) have been observed (see **Warnings and Precautions**). In placebo controlled monotherapy clinical trials involving 3368 patients on quetiapine fumarate and 1515 on placebo, the incidence of at least one occurrence of neutrophil count  $< 1.0 \times 10^9/L$  among patients with a normal baseline neutrophil count and at least one available follow up laboratory measurement was 0.3% (10/2967) in patients treated with quetiapine fumarate, compared to 0.1% (2/1349) in patients treated with placebo. Patients with a pre-existing low WBC or a history of drug induced leukopenia/neutropenia should have their complete blood count (CBC) monitored frequently during the first few months of therapy and should discontinue SEROQUEL at the first sign of a decline in WBC in absence of other causative factors (see **Warnings and Precautions**). **Hyperglycemia** In 2 long-term placebo-controlled clinical trials, mean exposure 213 days for SEROQUEL (646 patients) and 152 days for placebo (680 patients), the exposure-adjusted rate of any increased blood glucose level ( $\geq 126$  mg/dl) for patients more than 8 hours since a meal was 18.0 per 100 patient years for SEROQUEL (10.7% of patients) and 9.5 for placebo per 100 patient years (4.6% of patients). In short-term (12 weeks duration or less) placebo-controlled clinical trials (3342 patients treated with SEROQUEL and 1490 treated with placebo), the percent of patients who had a fasting blood glucose  $\geq 126$  mg/dl or a non fasting blood glucose  $\geq 200$  mg/dl was 3.5% for quetiapine and 2.1% for placebo. In a 24 week trial (active-controlled, 115 patients treated with SEROQUEL) designed to evaluate glycemic status with oral glucose tolerance testing of all patients, at week 24 the incidence of a treatment-emergent post-glucose challenge glucose level  $\geq 200$  mg/dl was 1.7% and the incidence of a fasting treatment-emergent blood glucose level  $\geq 126$  mg/dl was 2.6%. **ECG Changes** Between-group comparisons for pooled placebo-controlled trials revealed no statistically significant SEROQUEL/placebo differences in the proportions of patients experiencing potentially important changes in ECG parameters, including QT, QTc, and PR intervals. However, the proportions of patients meeting the criteria for tachycardia were compared in four 3- to 6-week placebo-controlled clinical trials for the treatment of schizophrenia revealing a 1% (4/399) incidence for SEROQUEL compared to 0.6% (1/156) incidence for placebo. In acute (monotherapy) bipolar mania trials the proportions of patients meeting the criteria for tachycardia was 0.5% (1/192) for SEROQUEL compared to 0% (0/178) incidence for placebo. In acute bipolar mania (adjunct) trials the proportions of patients meeting the same criteria was 0.6% (1/166) for SEROQUEL compared to 0% (0/171) incidence for placebo. In bipolar depression trials, no patients had heart rate increases to  $> 120$  beats per minute. SEROQUEL use was associated with a mean increase in heart rate, assessed by ECG, of 7 beats per minute compared to a mean increase of 1 beat per minute among placebo patients. This slight tendency to tachycardia may be related to SEROQUEL's potential for inducing orthostatic changes (see **Warnings and Precautions**). **Other Adverse Reactions Observed During the Pre-Marketing Evaluation of SEROQUEL** Following is a list of COSTART terms that reflect treatment-emergent adverse reactions as defined in the introduction to the ADVERSE REACTIONS section reported by patients treated with SEROQUEL at multiple doses  $\geq 75$  mg/day during any phase of a trial within the premarketing database of approximately 2200 patients treated for schizophrenia. All reported reactions are included except those already listed in the table or elsewhere in labeling, those reactions for which a drug cause was remote, and those reaction terms which were so general as to be uninformative. It is important to emphasize that, although the reactions reported occurred during treatment with SEROQUEL, they were not necessarily caused by it. Reactions are further categorized by body system and listed in order of decreasing frequency according to the following definitions: frequent adverse reactions are those occurring in at least 1/100 patients (only those not already listed in the tabulated results from placebo-controlled trials appear in this listing); infrequent adverse reactions are those occurring in 1/100 to 1/1000 patients; rare reactions are those occurring in fewer than 1/1000 patients. **Nervous System: Frequent:** hypertonia, dysarthria; **Infrequent:** abnormal dreams, dyskinesia, thinking abnormal, tardive dyskinesia, vertigo, involuntary movements, confusion, amnesia, psychosis, hallucinations, hyperkinesia, libido increased\*, urinary retention, incoordination, paranoid reaction, abnormal gait, myoclonus, delusions, manic reaction, apathy, ataxia, depersonalization, stupor, bruxism, catatonie reaction, hemiplegia; **Rare:** aphasia, buccoglossal syndrome, choreoathetosis, delirium, emotional lability, euphoria, libido decreased\*, neuralgia, stuttering, subdural hematoma. **Body as a Whole: Frequent:** flu syndrome; **Infrequent:** neck pain, pelvic pain\*, suicide attempt, malaise, photosensitivity reaction, chills, face edema, moniliasis; **Rare:** abdomen enlarged. **Digestive System: Frequent:** anorexia; **Infrequent:** increased salivation, increased appetite, gamma glutamyl transpeptidase increased, gingivitis, dysphagia, flatulence, gastroenteritis, gastritis, hemorrhoids, stomatitis, thirst, tooth caries, fecal incontinence, gastroesophageal reflux, gum hemorrhage, mouth ulceration, rectal hemorrhage, tongue edema; **Rare:** glossitis, hematemesis, intestinal obstruction, melena, pancreatitis. **Cardiovascular System: Frequent:** palpitation; **Infrequent:** vasodilatation, QT interval prolonged, migraine, bradycardia, cerebral ischemia, irregular pulse, T wave abnormality, bundle branch block, cerebrovascular accident, deep thrombophlebitis, T wave inversion; **Rare:** angina pectoris, atrial fibrillation, AV block first degree, congestive heart failure, ST elevated, thrombophlebitis, T wave flattening, ST abnormality, increased QRS duration. **Respiratory System: Frequent:** pharyngitis, rhinitis, cough increased, dyspnea; **Infrequent:** pneumonia, epistaxis, asthma; **Rare:** hiccup, hyperventilation. **Metabolic and Nutritional System: Frequent:** peripheral edema; **Infrequent:** weight loss, alkaline phosphatase increased, hyperlipemia, alcohol intolerance, dehydration, hyperglycemia, creatinine increased, hypoglycemia; **Rare:** glycosuria, gout, hand edema, hypokalemia, water intoxication. **Skin and Appendages System: Frequent:** sweating; **Infrequent:** pruritus, acne, eczema, contact dermatitis, maculopapular rash, seborrhea, skin ulcer; **Rare:** exfoliative dermatitis, psoriasis, skin discoloration. **Urogenital System: Infrequent:** dysmenorrhea\*, vaginitis\*, urinary incontinence, metrorrhagia\*, impotence\*, dysuria, vaginal moniliasis\*, abnormal ejaculation\*, cystitis, urinary frequency, amenorrhea\*, female lactation\*, leukorrhea\*, vaginal hemorrhage\*, vulvovaginitis\* orchitis\*; **Rare:** gynecomastia\*, nocturia, polyuria, acute kidney failure. **Special Senses: Infrequent:** conjunctivitis, abnormal vision, dry eyes, tinnitus, taste perversion, blepharitis, eye pain; **Rare:** abnormality of accommodation, deafness, glaucoma. **Musculoskeletal System: Infrequent:** pathological fracture, myasthenia, twitching, arthralgia, arthritis, leg cramps, bone pain. **Hemic and Lymphatic System: Frequent:** leukopenia; **Infrequent:** leukocytosis, anemia, ecchymosis, eosinophilia, hypochromic anemia; lymphadenopathy, cyanosis; **Rare:** hemolysis, thrombocytopenia. **Endocrine System: Infrequent:** hypothyroidism, diabetes mellitus; **Rare:** hyperthyroidism. **Post Marketing Experience** The following adverse reactions were identified during post approval of SEROQUEL. Because these reactions are reported voluntarily from a population of uncertain size, it is not always possible to reliably estimate their frequency or establish a causal relationship to drug exposure. Adverse reactions reported since market introduction

\*adjusted for gender



which were temporally related to SEROQUEL therapy include: anaphylactic reaction. Other adverse reactions reported since market introduction, which were temporally related to SEROQUEL therapy, but not necessarily causally related, include the following: agranulocytosis, cardiomyopathy, hyponatremia, myocarditis, rhabdomyolysis, syndrome of inappropriate antidiuretic hormone secretion (SIADH), and Stevens-Johnson syndrome (SJS).

## DRUG INTERACTIONS

The risks of using SEROQUEL in combination with other drugs have not been extensively evaluated in systematic studies. Given the primary CNS effects of SEROQUEL, caution should be used when it is taken in combination with other centrally acting drugs. SEROQUEL potentiated the cognitive and motor effects of alcohol in a clinical trial in subjects with selected psychotic disorders, and alcoholic beverages should be avoided while taking SEROQUEL. Because of its potential for inducing hypotension, SEROQUEL may enhance the effects of certain antihypertensive agents. SEROQUEL may antagonize the effects of levodopa and dopamine agonists. **The Effect of Other Drugs on Quetiapine Phenytoin:** Coadministration of quetiapine (250 mg tid) and phenytoin (100 mg tid) increased the mean oral clearance of quetiapine by 5-fold. Increased doses of SEROQUEL may be required to maintain control of symptoms of schizophrenia in patients receiving quetiapine and phenytoin, or other hepatic enzyme inducers (e.g., carbamazepine, barbiturates, rifampin, glucocorticoids). Caution should be taken if phenytoin is withdrawn and replaced with a non-inducer (e.g., valproate) (see **Dosage and Administration**). **Divalproex:** Coadministration of quetiapine (150 mg bid) and divalproex (500 mg bid) increased the mean maximum plasma concentration of quetiapine at steady state by 17% without affecting the extent of absorption or mean oral clearance. **Thioridazine:** Thioridazine (200 mg bid) increased the oral clearance of quetiapine (300 mg bid) by 65%. **Cimetidine:** Administration of multiple daily doses of cimetidine (400 mg tid for 4 days) resulted in a 20% decrease in the mean oral clearance of quetiapine (150 mg tid). Dosage adjustment for quetiapine is not required when it is given with cimetidine. **P450 3A Inhibitors:** Coadministration of ketoconazole (200 mg once daily for 4 days), a potent inhibitor of cytochrome P450 3A, reduced oral clearance of quetiapine by 84%, resulting in a 335% increase in maximum plasma concentration of quetiapine. Caution (reduced dosage) is indicated when SEROQUEL is administered with ketoconazole and other inhibitors of cytochrome P450 3A (e.g., itraconazole, fluconazole, erythromycin, and protease inhibitors). **Fluoxetine, Imipramine, Haloperidol, and Risperidone:** Coadministration of fluoxetine (60 mg once daily); imipramine (75 mg bid), haloperidol (7.5 mg bid), or risperidone (3 mg bid) with quetiapine (300 mg tid) did not alter the steady-state pharmacokinetics of quetiapine. **Effect of Quetiapine on Other Drugs Lorazepam:** The mean oral clearance of lorazepam (2 mg, single dose) was reduced by 20% in the presence of quetiapine administered as 250 mg tid dosing. **Divalproex:** The mean maximum concentration and extent of absorption of total and free valproic acid at steady state were decreased by 10 to 12% when divalproex (500 mg bid) was administered with quetiapine (150 mg bid). The mean oral clearance of total valproic acid (administered as divalproex 500 mg bid) was increased by 11% in the presence of quetiapine (150 mg bid). The changes were not significant. **Lithium:** Concomitant administration of quetiapine (250 mg tid) with lithium had no effect on any of the steady-state pharmacokinetic parameters of lithium. **Antipyrine:** Administration of multiple daily doses up to 750 mg/day (on a tid schedule) of quetiapine to subjects with selected psychotic disorders had no clinically relevant effect on the clearance of antipyrine or urinary recovery of antipyrine metabolites. These results indicate that quetiapine does not significantly induce hepatic enzymes responsible for cytochrome P450 mediated metabolism of antipyrine.

## USE IN SPECIFIC POPULATIONS

**Pregnancy** The teratogenic potential of quetiapine was studied in Wistar rats and Dutch Belted rabbits dosed during the period of organogenesis. No evidence of a teratogenic effect was detected in rats at doses of 25 to 200 mg/kg or 0.3 to 2.4 times the maximum human dose on a mg/m<sup>2</sup> basis or in rabbits at 25 to 100 mg/kg or 0.6 to 2.4 times the maximum human dose on a mg/m<sup>2</sup> basis. There was, however, evidence of embryo/fetal toxicity. Delays in skeletal ossification were detected in rat fetuses at doses of 50 and 200 mg/kg (0.6 and 2.4 times the maximum human dose on a mg/m<sup>2</sup> basis) and in rabbits at 50 and 100 mg/kg (1.2 and 2.4 times the maximum human dose on a mg/m<sup>2</sup> basis). Fetal body weight was reduced in rat fetuses at 200 mg/kg and rabbit fetuses at 100 mg/kg (2.4 times the maximum human dose on a mg/m<sup>2</sup> basis for both species). There was an increased incidence of a minor soft tissue anomaly (carpal/tarsal flexure) in rabbit fetuses at a dose of 100 mg/kg (2.4 times the maximum human dose on a mg/m<sup>2</sup> basis). Evidence of maternal toxicity (i.e., decreases in body weight gain and/or death) was observed at the high dose in the rat study and at all doses in the rabbit study. In a peri/postnatal reproductive study in rats, no drug-related effects were observed at doses of 1, 10, and 20 mg/kg or 0.01, 0.12, and 0.24 times the maximum human dose on a mg/m<sup>2</sup> basis. However, in a preliminary peri/postnatal study, there were increases in fetal and pup death, and decreases in mean litter weight at 150 mg/kg, or 3.0 times the maximum human dose on a mg/m<sup>2</sup> basis. There are no adequate and well-controlled studies in pregnant women and quetiapine should be used during pregnancy only if the potential benefit justifies the potential risk to the fetus. **Labor and Delivery** The effect of SEROQUEL on labor and delivery in humans is unknown. **Nursing Mothers** SEROQUEL was excreted in milk of treated animals during lactation. It is not known if SEROQUEL is excreted in human milk. It is recommended that women receiving SEROQUEL should not breast feed. **Pediatric Use** The safety and effectiveness of SEROQUEL in pediatric patients have not been established. Anyone considering the use of SEROQUEL in a child or adolescent must balance the potential risks with the clinical need. **Geriatric Use** Of the approximately 3700 patients in clinical studies with SEROQUEL, 7% (232) were 65 years of age or over. In general, there was no indication of any different tolerability of SEROQUEL in the elderly compared to younger adults. Nevertheless, the presence of factors that might decrease pharmacokinetic clearance, increase the pharmacodynamic response to SEROQUEL, or cause poorer tolerance or orthostasis, should lead to consideration of a lower starting dose, slower titration, and careful monitoring during the initial dosing period in the elderly. The mean plasma clearance of SEROQUEL was reduced by 30% to 50% in elderly patients when compared to younger patients [see **Clinical Pharmacology** in full Prescribing Information (12) and **Dosage and Administration**].

## DRUG ABUSE AND DEPENDENCE

**Controlled Substance** SEROQUEL is not a controlled substance. **Abuse** SEROQUEL has not been systematically studied, in animals or humans, for its potential for abuse, tolerance or physical dependence. While the clinical trials did not reveal any tendency for any drug-seeking behavior, these observations were not systematic and it is not possible to predict on the basis of this limited experience the extent to which a CNS-active drug will be misused, diverted, and/or abused once marketed. Consequently, patients should be

evaluated carefully for a history of drug abuse, and such patients should be observed closely for signs of misuse or abuse of SEROQUEL, e.g., development of tolerance, increases in dose, drug-seeking behavior.

## OVERDOSAGE

**Human Experience** In clinical trials, survival has been reported in acute overdoses of up to 30 grams of quetiapine. Most patients who overdosed experienced no adverse reactions or recovered fully from the reported reactions. Death has been reported in a clinical trial following an overdose of 13.6 grams of quetiapine alone. In general, reported signs and symptoms were those resulting from an exaggeration of the drugs known pharmacological effects, i.e., drowsiness and sedation, tachycardia and hypotension. Patients with pre-existing severe cardiovascular disease may be at an increased risk of the effects of overdose (see **Warnings and Precautions**). One case, involving an estimated overdose of 9600 mg, was associated with hypokalemia and first degree heart block. In post-marketing experience, there have been very rare reports of overdose of SEROQUEL alone resulting in death, coma, or QTc prolongation. **Management of Overdose** In case of acute overdose, establish and maintain an airway and ensure adequate oxygenation and ventilation. Gastric lavage (after intubation, if patient is unconscious) and administration of activated charcoal together with a laxative should be considered. The possibility of obtundation, seizure or dystonic reaction of the head and neck following overdose may create a risk of aspiration with induced emesis. Cardiovascular monitoring should commence immediately and should include continuous electrocardiographic monitoring to detect possible arrhythmias. If antiarrhythmic therapy is administered, disopyramide, procainamide and quinidine carry a theoretical hazard of additive QT-prolonging effects when administered in patients with acute overdose of SEROQUEL. Similarly it is reasonable to expect that the alpha-adrenergic-blocking properties of bretylium might be additive to those of quetiapine, resulting in problematic hypotension. There is no specific antidote to SEROQUEL. Therefore appropriate supportive measures should be instituted. The possibility of multiple drug involvement should be considered. Hypotension and circulatory collapse should be treated with appropriate measures such as intravenous fluids and/or sympathomimetic agents (epinephrine and dopamine should not be used, since beta stimulation may worsen hypotension in the setting of quetiapine-induced alpha blockade). In cases of severe extrapyramidal symptoms, anticholinergic medication should be administered. Close medical supervision and monitoring should continue until the patient recovers.

## PATIENT COUNSELING INFORMATION

Prescribers or other health professionals should inform patients, their families, and their caregivers about the benefits and risks associated with treatment with SEROQUEL and should counsel them in its appropriate use. A patient Medication Guide about "Antidepressant Medicines, Depression and other Serious Mental Illness, and Suicidal Thoughts or Actions" is available for SEROQUEL. The prescriber or health professional should instruct patients, their families, and their caregivers to read the Medication Guide and should assist them in understanding its contents. Patients should be given the opportunity to discuss the contents of the Medication Guide and to obtain answers to any questions they may have. Patients should be advised of the following issues and asked to alert their prescriber if these occur while taking SEROQUEL. **Clinical Worsening and Suicide Risk** Patients, their families, and their caregivers should be encouraged to be alert to the emergence of anxiety, agitation, panic attacks, insomnia, irritability, hostility, aggressiveness, impulsivity, akathisia (psychomotor restlessness), hypomania, mania, other unusual changes in behavior, worsening of depression, and suicidal ideation, especially early during antidepressant treatment and when the dose is adjusted up or down. Families and caregivers of patients should be advised to look for the emergence of such symptoms on a day-to-day basis, since changes may be abrupt. Such symptoms should be reported to the patient's prescriber or health professional, especially if they are severe, abrupt in onset, or were not part of the patient's presenting symptoms. Symptoms such as these may be associated with an increased risk for suicidal thinking and behavior and indicate a need for very close monitoring and possibly changes in the medication. **Increased Mortality in Elderly Patients with Dementia-Related Psychosis** Patients and caregivers should be advised that elderly patients with dementia-related psychoses treated with atypical antipsychotic drugs are at increased risk of death compared with placebo. Quetiapine is not approved for elderly patients with dementia-related psychosis. **Neuroleptic Malignant Syndrome (NMS)** Patients should be advised to report to their physician any signs or symptoms that may be related to NMS. These may include muscle stiffness and high fever. **Hyperglycemia and Diabetes Mellitus** Patients should be aware of the symptoms of hyperglycemia (high blood sugar) and diabetes mellitus. Patients who are diagnosed with diabetes, those with risk factors for diabetes, or those that develop these symptoms during treatment should be monitored. **Orthostatic Hypotension** Patients should be advised of the risk of orthostatic hypotension (symptoms include feeling dizzy or lightheaded upon standing) especially during the period of initial dose titration, and also at times of re-initiating treatment or increases in dose. **Leukopenia/Neutropenia** Patients with a pre-existing low WBC or a history of drug induced leukopenia/neutropenia should be advised that they should have their CBC monitored while taking SEROQUEL (see **Warnings and Precautions**). **Interference with Cognitive and Motor Performance** Patients should be advised of the risk of somnolence or sedation, especially during the period of initial dose titration. Patients should be cautioned about performing any activity requiring mental alertness, such as operating a motor vehicle (including automobiles) or operating machinery, until they are reasonably certain quetiapine therapy does not affect them adversely. Patients should limit consumption of alcohol during treatment with quetiapine. **Pregnancy and Nursing** Patients should be advised to notify their physician if they become pregnant or intend to become pregnant during therapy. Patients should be advised not to breast feed if they are taking quetiapine. **Concomitant Medication** As with other medications, patients should be advised to notify their physicians if they are taking, or plan to take, any prescription or over-the-counter drugs. **Heat Exposure and Dehydration** Patients should be advised regarding appropriate care in avoiding overheating and dehydration.

SEROQUEL is a registered trademark of the AstraZeneca group of companies ©AstraZeneca 2008  
AstraZeneca Pharmaceuticals LP, Wilmington, DE 19850  
Made in USA

35018-01 07/08 266957



Patients with  
social anxiety disorder (SAD) or  
obsessive compulsive disorder (OCD)  
can often feel caged in...

# NOW

there is  
a new way out

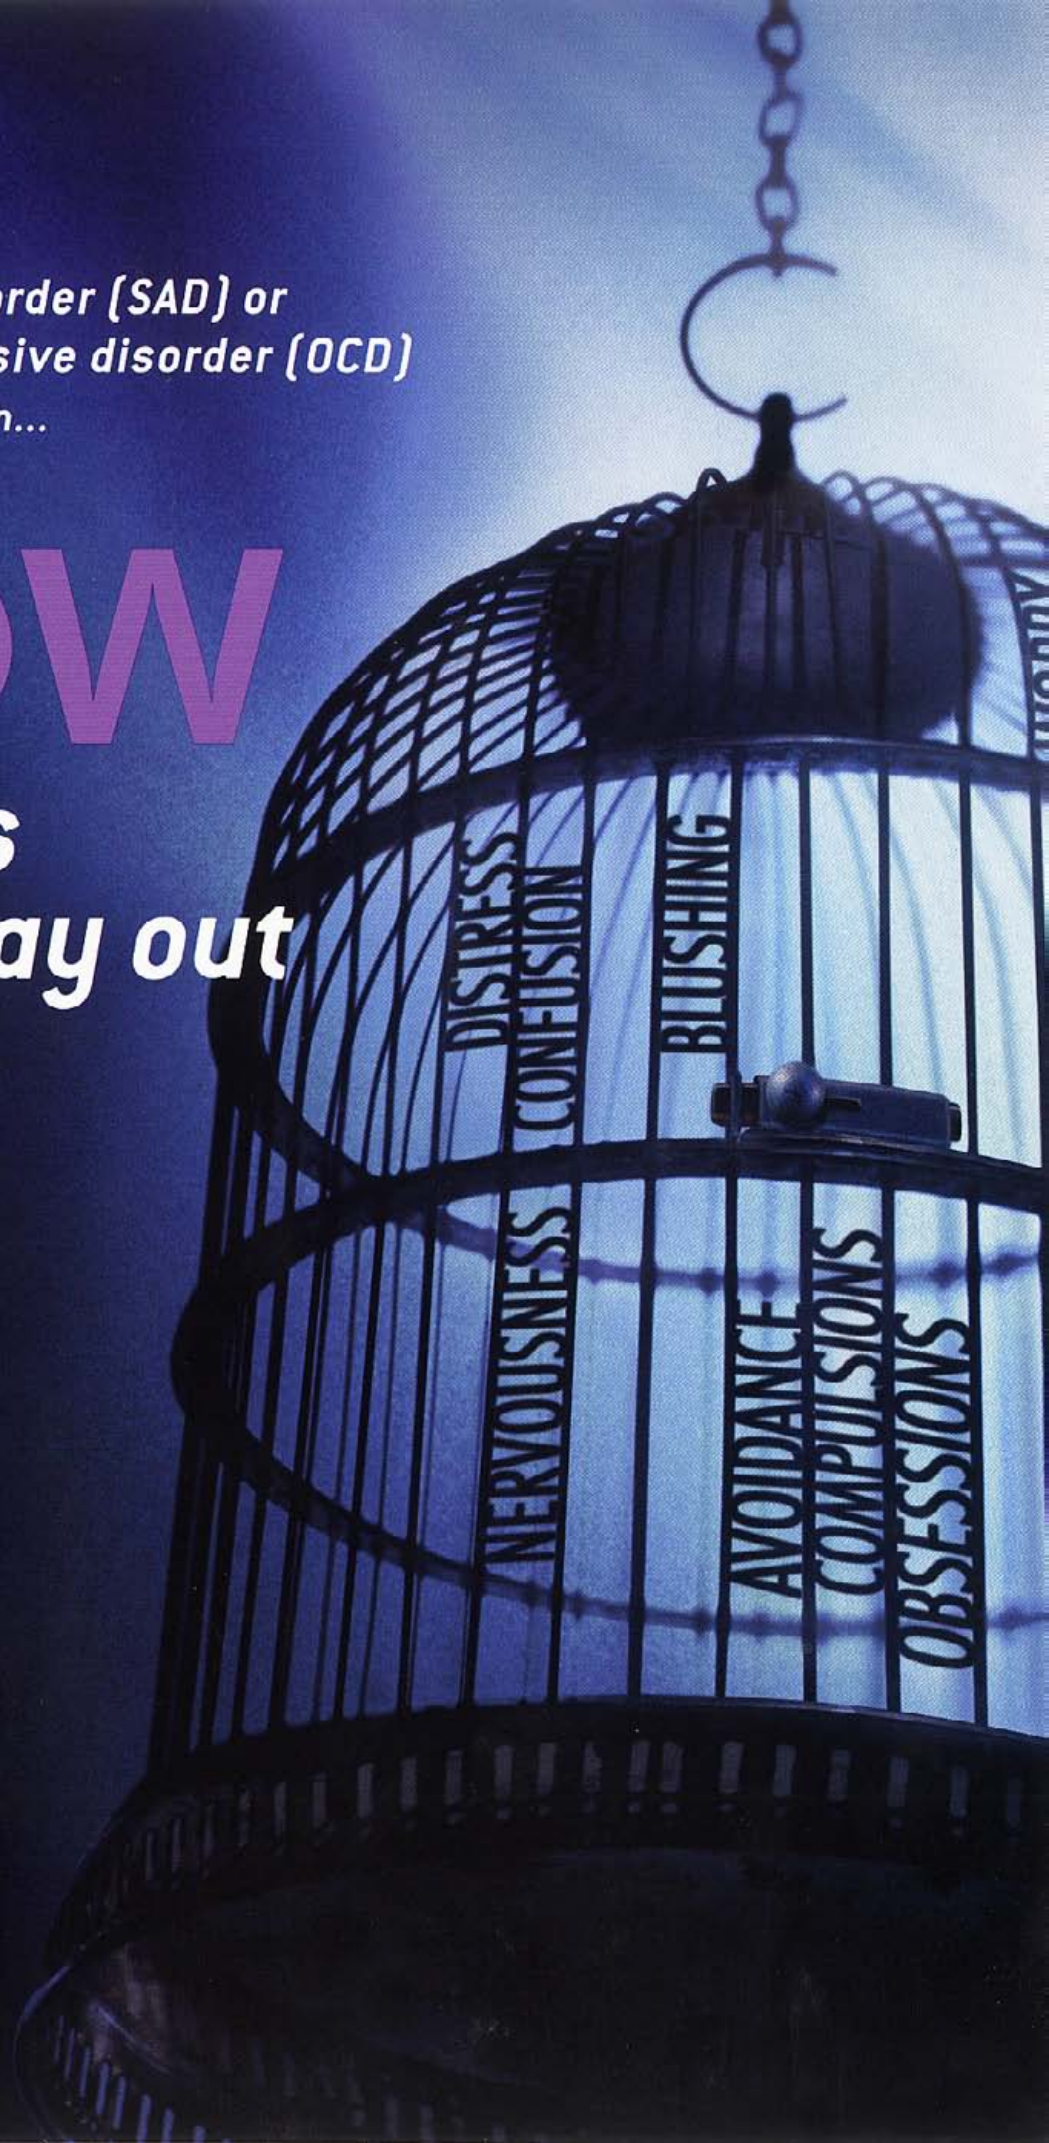



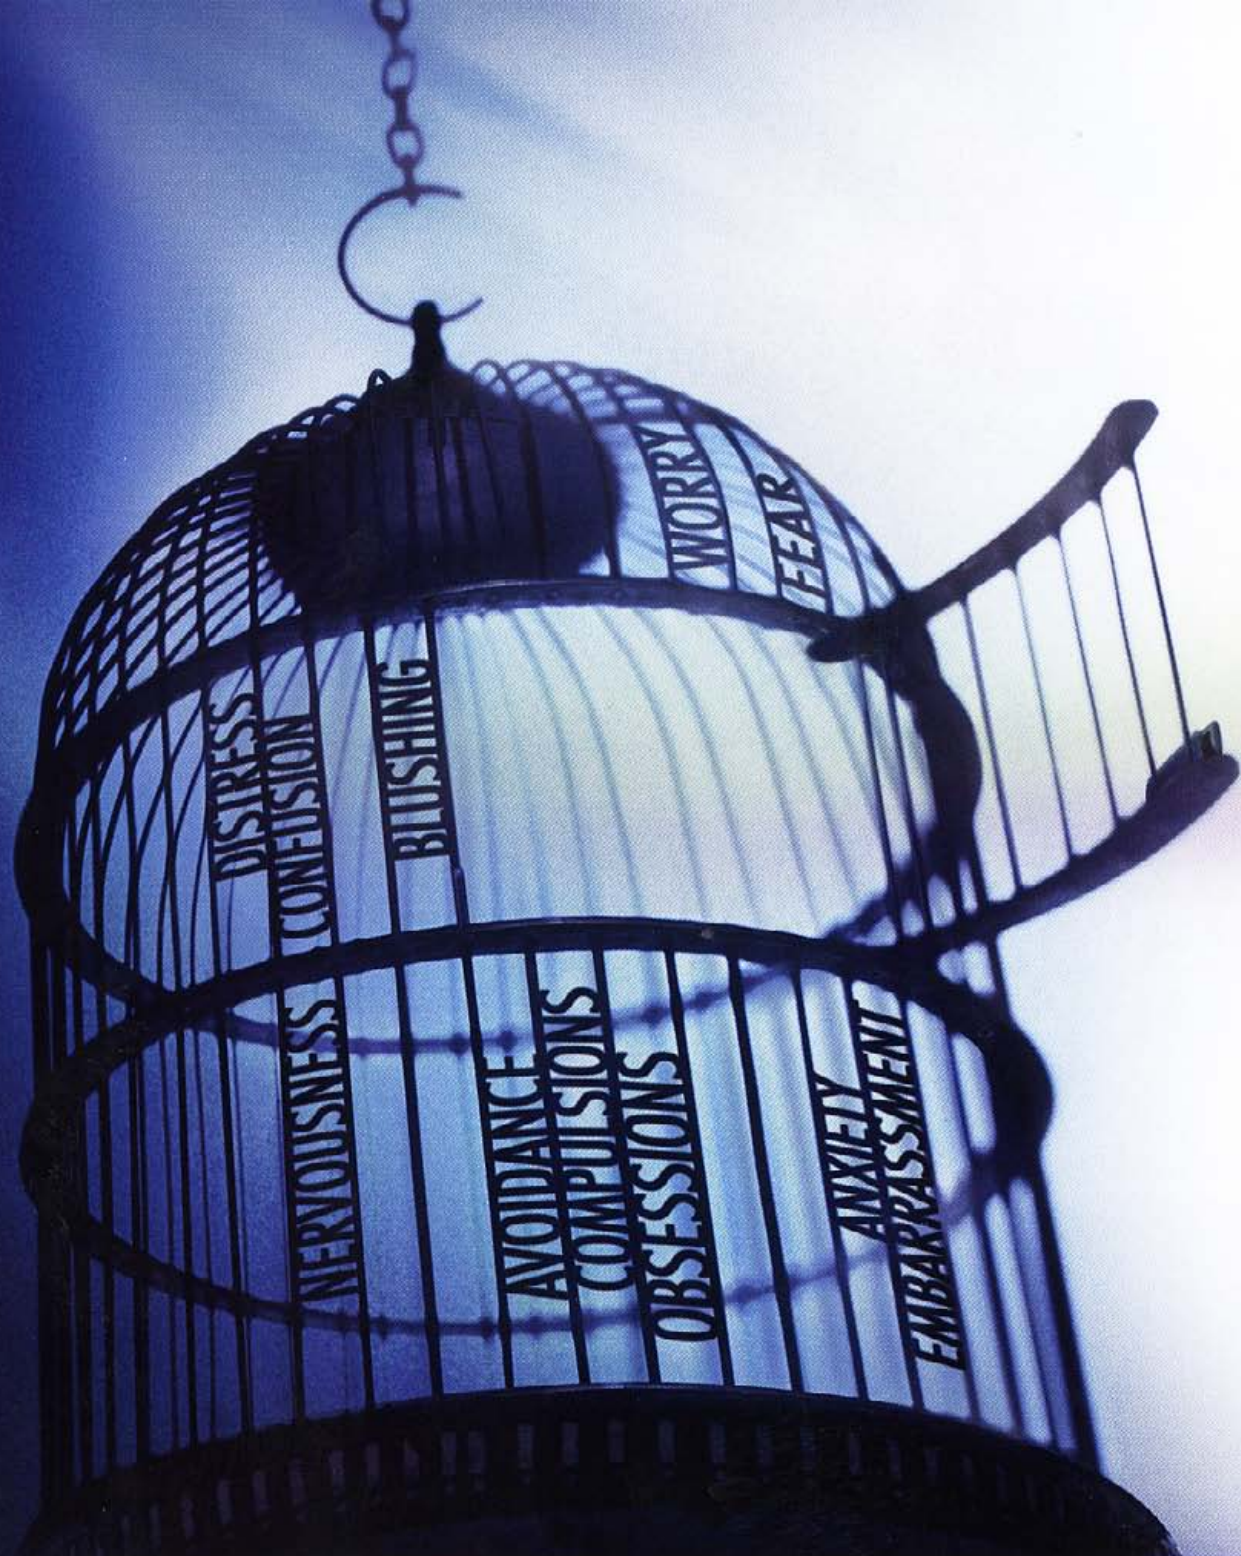

### **Suicidality and Antidepressant Drugs**

Antidepressants increased the risk compared to placebo of suicidal thinking and behavior (suicidality) in children, adolescents, and young adults in short-term studies of major depressive disorder (MDD) and other psychiatric disorders. Anyone considering the use of LUVOX® CR (fluvoxamine maleate) Extended-Release Capsules or any other antidepressant in a child, adolescent, or young adult must balance this risk with the clinical need. Short-term studies did not show an increase in the risk of suicidality with antidepressants compared to placebo in adults beyond age 24; there was a reduction in risk with antidepressants compared to placebo in adults aged 65 and older. Depression and certain other psychiatric disorders are themselves associated with increases in the risk of suicide. Patients of all ages who are started on antidepressant therapy should be monitored appropriately and observed closely for clinical worsening, suicidality, or unusual changes in behavior. Families and caregivers should be advised of the need for close observation and communication with the prescriber. LUVOX CR Capsules are not approved for use in pediatric patients. (See WARNINGS: Clinical Worsening and Suicide Risk, PRECAUTIONS: Information for Patients, and PRECAUTIONS: Pediatric Use.)



# **NEW** FOR SOCIAL ANXIETY DISORDER (SAD) AND OBSESSIVE COMPULSIVE DISORDER (OCD)

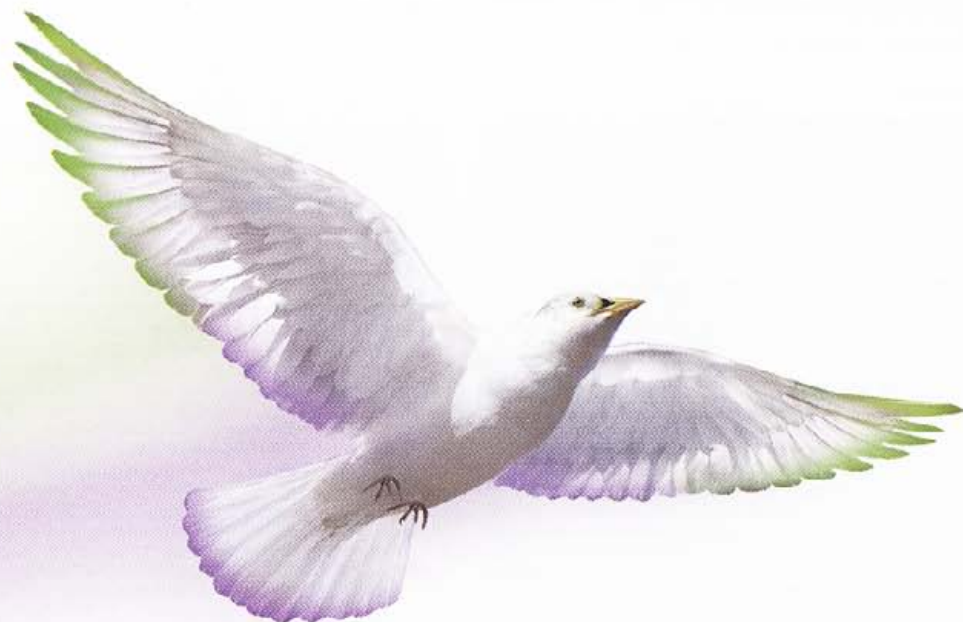

## **NOW YOUR PATIENTS CAN** *Experience a new release*

### **Once-A-Day Luvox CR delivers...**

- Proven efficacy in SAD and OCD<sup>1-4</sup>
- Weight-neutral profile (no significant weight gain or loss)<sup>1-4</sup>
- Low incidence of sexual adverse events<sup>4</sup>
- Available in 100 mg and 150 mg dose strengths

### **Important Safety Information**

#### **CONTRAINDICATIONS**

The use of alosetron, tizanidine, thioridazine, or pimozide with Luvox CR Capsules is contraindicated. The use of MAO inhibitors in combination with Luvox CR Capsules, or within 14 days of discontinuing treatment with Luvox CR Capsules, is contraindicated (see **WARNINGS** and **PRECAUTIONS**). Luvox CR Capsules are also contraindicated in patients with a history of hypersensitivity to fluvoxamine maleate or any of its excipients.

*Introducing a new Once-A-Day SSRI*

**LUVOX<sup>CR</sup>**  
fluvoxamine maleate extended-release capsules

**EXPERIENCE A NEW RELEASE™**

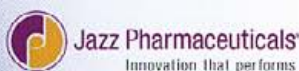

[www.LuvoxCR.com](http://www.LuvoxCR.com)

Please see brief summary of prescribing information on following pages.



# LUVOX CR

fluvoxamine maleate extended-release capsules

100 mg and 150 mg

Brief summary. See package insert for full prescribing information.

R<sub>x</sub> only

## Suicidality and Antidepressant Drugs

Antidepressants increased the risk compared to placebo of suicidal thinking and behavior (suicidality) in children, adolescents, and young adults in short-term studies of major depressive disorder (MDD) and other psychiatric disorders. Anyone considering the use of LUVOX CR (fluvoxamine maleate) Extended-Release Capsules or any other antidepressant in a child, adolescent, or young adult must balance this risk with the clinical need. Short-term studies did not show an increase in the risk of suicidality with antidepressants compared to placebo in adults beyond age 24; there was a reduction in risk with antidepressants compared to placebo in adults aged 65 and older. Depression and certain other psychiatric disorders are themselves associated with increases in the risk of suicide. Patients of all ages who are started on antidepressant therapy should be monitored appropriately and observed closely for clinical worsening, suicidality, or unusual changes in behavior. Families and caregivers should be advised of the need for close observation and communication with the prescriber. LUVOX CR Capsules are not approved for use in pediatric patients. (See WARNINGS and PRECAUTIONS.)

**INDICATIONS**—LUVOX CR (fluvoxamine maleate) Extended-Release Capsules are indicated for the treatment of social anxiety disorder (SAD), also known as social phobia, and for the treatment of obsessions and compulsions in patients with obsessive compulsive disorder (OCD) (both as defined in the DSM-IV).

**CONTRAINDICATIONS**—Co-administration of aloxetine, tizanidine, thioridazine, or pimozide; use of MAO inhibitors in combination with or within 14 days of discontinuing treatment with LUVOX CR; use in patients with a history of hypersensitivity to fluvoxamine maleate or any of the excipients. (See WARNINGS and PRECAUTIONS.)

**WARNINGS**—**Clinical Worsening and Suicide Risk:** Adult and pediatric patients with MDD may experience worsening of their depression and/or the emergence of suicidal ideation and behavior (suicidality) or unusual changes in behavior, whether or not they are taking antidepressants, and this risk may persist until significant remission occurs. Suicide is a known risk of depression and certain other psychiatric disorders, and these disorders themselves are the strongest predictors of suicide. There has been a long-standing concern, however, that antidepressants may have a role in inducing worsening of depression and the emergence of suicidality in certain patients during the early phases of treatment. The pooled analyses of short-term placebo-controlled trials of antidepressants (SSRIs and others) showed that these drugs increased the risk of suicidal thinking and behavior (suicidality) in children, adolescents, and young adults (ages 18-24) with MDD and other psychiatric disorders. Short-term studies did not show an increase in the risk of suicidality with antidepressants compared to placebo in adults beyond age 24; there was a reduction with antidepressants compared to placebo in adults  $\geq 65$  years. The pooled analyses of placebo-controlled trials in children and adolescents with MDD, OCD, or other psychiatric disorders included a total of 24 short-term trials of 9 antidepressants in over 4,400 patients. The pooled analyses of placebo-controlled trials in adults with MDD or other psychiatric disorders included a total of 295 short-term trials (median duration of 2 months) of 11 antidepressants in over 77,000 patients. There was considerable variation in risk of suicidality among drugs, but a tendency toward an increase in the younger patients for almost all drugs studied. There were differences in absolute risk of suicidality across the different indications, with the highest incidence in MDD. The risk differences (drug vs placebo), however, were relatively stable within age strata and across indications. These risk differences (drug-placebo difference in the number of cases of suicidality per 1,000 patients treated) include drug-related increases (14 additional cases in patients  $< 18$  years old, 5 in 18- to 24-year-olds) and decreases (1 fewer case in 26- to 64-year-olds; 6 fewer cases in patients  $\geq 65$  years old). No suicides occurred in any of the pediatric trials. There were suicides in the adult trials, but the number was not sufficient to reach any conclusion about the drug effect on suicide. It is unknown whether the suicidality risk extends to longer-term use, ie, beyond several months. However, there is substantial evidence from placebo-controlled maintenance trials in adults with depression that the use of antidepressants can delay the recurrence of depression. All patients being treated with antidepressants for any indication should be monitored appropriately and observed closely for clinical worsening, suicidality, and unusual changes in behavior, especially during the initial few months of a course of drug therapy, or at times of dose changes (increases or decreases). The following symptoms, anxiety, agitation, panic attacks, insomnia, irritability, hostility, aggressiveness, impulsivity, akathisia (psychomotor restlessness), hypomania, and mania, have been reported in adult and pediatric patients being treated with antidepressants for MDD as well as for other psychiatric and nonpsychiatric indications. Although a causal link between the emergence of such symptoms and either the worsening of depression and/or the emergence of suicidal impulses has not been established, there is concern that such symptoms may represent precursors to emerging suicidality. Consideration should be given to changing the therapeutic regimen, including possibly discontinuing the medication, in patients whose depression is persistently worse, or who are experiencing emergent suicidality or symptoms that might be precursors to worsening depression or suicidality, especially if these symptoms are severe, abrupt in onset, or were not part of the patient's presenting symptoms. If the decision has been made to discontinue treatment, medication should be tapered, as rapidly as is feasible, but with recognition that abrupt discontinuation can be associated with certain symptoms (see PRECAUTIONS and DOSAGE AND ADMINISTRATION—Discontinuation of Treatment with LUVOX CR). Families and caregivers of patients being treated with antidepressants for MDD or other psychiatric and nonpsychiatric indications should be alerted about the need to monitor patients for the emergence of agitation, irritability, unusual changes in behavior, and the other symptoms described above, as well as the emergence of suicidality, and to report such symptoms immediately to health care providers. Monitoring should include daily observation by families and caregivers. Prescriptions for LUVOX CR should be written for the smallest quantity of capsules consistent with good patient management to reduce the risk of overdose.

**Screening Patients for Bipolar Disorder:** A major depressive episode may be the initial presentation of bipolar disorder. It is generally believed (though not established in controlled trials) that treating such an episode with an antidepressant alone may increase the likelihood of precipitation of a mixed/manic episode in patients at risk for bipolar disorder. Whether any of the symptoms described above represent such a conversion is unknown. However, prior to initiating treatment with an antidepressant, patients with depressive symptoms should be adequately screened to determine if they are at risk for bipolar disorder; such screening should include a detailed psychiatric history, including a family history of suicide, bipolar disorder, and depression. LUVOX CR is not approved for use in treating bipolar depression.

**Potential for Monoamine Oxidase Inhibitors (MAOIs) Interaction:** In patients receiving another serotonergic reuptake inhibitor drug in combination with MAOIs, there have been reports of serious, sometimes fatal, reactions including hyperthermia, rigidity, myoclonus, autonomic instability with possible rapid fluctuations of vital signs, and mental status changes that include extreme agitation progressing to delirium and coma. These reactions have also been reported in patients who have discontinued that drug and have been started on an MAOI. Some cases presented with features resembling a serotonin syndrome or neuroleptic malignant syndrome. Therefore, LUVOX CR should not be used in combination with an MAOI, or within 14 days of discontinuing treatment with an MAOI (see CONTRAINDICATIONS).

**Potential Thioridazine Interaction:** The effect of fluvoxamine (25 mg immediate-release [IR] given twice daily [bid] for 1 week) on thioridazine steady-state concentrations was evaluated in 10 male inpatients with schizophrenia. Concentrations of thioridazine and its 2 active metabolites,

mesoridazine and sulforidazine, increased 3-fold following co-administration of fluvoxamine. Thioridazine administration produces a dose-related prolongation of the QTc interval, which is associated with serious ventricular arrhythmias, such as torsades de pointes-type arrhythmias, and sudden death. This experience likely underestimates the degree of risk that might occur with higher doses of thioridazine. Moreover, the effect of fluvoxamine may be even more pronounced at higher doses. Therefore, LUVOX CR and thioridazine should not be co-administered (see CONTRAINDICATIONS and PRECAUTIONS).

**Potential Tizanidine Interaction:** Fluvoxamine is a potent inhibitor of CYP1A2 and tizanidine is a CYP1A2 substrate. The effect of IR fluvoxamine maleate (100 mg daily for 4 days) on the pharmacokinetics (PK) and pharmacodynamics (PD) of a single dose of tizanidine has been studied in 10 healthy male subjects. Tizanidine C<sub>max</sub> was increased ~12-fold (range 5- to 32-fold), elimination half-life was increased almost 3-fold, and AUC increased 33-fold (range 14- to 103-fold). The mean maximal effect on blood pressure was a 35 mm Hg decrease in systolic blood pressure, a 20 mm Hg decrease in diastolic blood pressure, and a 4 beat/min decrease in heart rate. Drowsiness was significantly increased and performance on the psychomotor task was significantly impaired. LUVOX CR and tizanidine should not be used together (see CONTRAINDICATIONS and PRECAUTIONS).

**Potential Alosetron Interaction:** Fluvoxamine, an inhibitor of several CYP isozymes, has been shown to increase mean alosetron plasma concentrations (AUC) ~6-fold and prolonged the T<sub>1/2</sub> by ~3-fold. Therefore, it is recommended not to use LUVOX CR in combination with alosetron (see CONTRAINDICATIONS, PRECAUTIONS, and Lotronex™ (alosectron) package insert). Use with Rimelepton: Rimelepton should not be used in combination with LUVOX CR (see PRECAUTIONS: Drug Interactions).

**Potential Pimozide Interaction:** Pimozide is metabolized by the CYP3A4 isozyme. It has been demonstrated that ketoconazole, a potent inhibitor of CYP3A4, blocks the metabolism of this drug, resulting in increased plasma concentrations of parent drug. Increased plasma concentration of pimozide causes QT prolongation and has been associated with torsades de pointes-type ventricular tachycardia, sometimes fatal. A substantial PK interaction has been observed for fluvoxamine in combination with alprazolam, a drug known to be metabolized by the CYP3A4 isozyme. Although it has not been definitively demonstrated that fluvoxamine is a potent CYP3A4 inhibitor, it is likely to be, given the substantial interaction of fluvoxamine with alprazolam. Consequently, it is recommended that fluvoxamine not be used in combination with pimozide (see CONTRAINDICATIONS and PRECAUTIONS).

**Other Potentially Important Drug Interactions:** (Also see PRECAUTIONS—Drug Interactions).

**Benzodiazepines:** Benzodiazepines metabolized by hepatic oxidation (eg alprazolam, midazolam, triazolam, etc.) should be used with caution because the clearance of these drugs is likely to be reduced by fluvoxamine. The clearance of benzodiazepines metabolized by glucuronidation (eg lorazepam, oxazepam, temazepam) is unlikely to be affected by fluvoxamine.

**Alprazolam:** When IR fluvoxamine maleate (100 mg once daily [qd]) and alprazolam (1 mg four times per day) were co-administered to steady state, plasma concentrations and other PK parameters (AUC, C<sub>max</sub>, T<sub>1/2</sub>) of alprazolam were approximately twice those observed when alprazolam was administered alone; oral clearance was reduced by about 50%. The elevated plasma alprazolam concentrations resulted in decreased psychomotor performance and memory. This interaction, which has not been investigated using higher doses of fluvoxamine, may be more pronounced if a 300 mg daily dose is co-administered, particularly since fluvoxamine exhibits non-linear PK over the dose range 100-300 mg. If alprazolam is co-administered with LUVOX CR, the initial alprazolam dose should be at least halved and titration to the lowest effective dose is recommended. No dose adjustment is required for LUVOX CR.

**Diazepam:** The co-administration of LUVOX CR and diazepam is generally not advisable. Because fluvoxamine reduces the clearance of both diazepam and its active metabolite, N-desmethyldiazepam, there is a strong likelihood of substantial accumulation of both species during chronic co-administration. Evidence supporting the conclusion that it is inadvisable to co-administer fluvoxamine and diazepam derives from a study in which healthy volunteers taking 150 mg/day of IR fluvoxamine maleate were administered a single oral dose of 10 mg of diazepam. In these subjects (n=8), the clearance of diazepam was reduced by 65% and that of N-desmethyldiazepam to a level too low to measure over the course of the 2-week long study. It is likely that this experience significantly underestimates the degree of accumulation that might occur with repeated diazepam administration. Moreover, as noted with alprazolam, the effect of fluvoxamine may be even more pronounced at higher doses. Accordingly, diazepam and fluvoxamine should not ordinarily be co-administered.

**Mexiletine:** The effect of steady-state IR fluvoxamine maleate (50 mg bid for 7 days) on the single-dose PK of mexiletine (200 mg) was evaluated in 6 healthy Japanese males. The clearance of mexiletine was reduced by 38% following co-administration with fluvoxamine compared to mexiletine alone. If fluvoxamine and mexiletine are co-administered, serum mexiletine levels should be monitored.

**Neuroleptic Malignant Syndrome (NMS) or NMS-Like Events:** Rare instances of NMS or NMS-like events have been reported in association with fluvoxamine treatment when co-administered with anti-psychotics. Additionally, a small number of such cases have been reported with fluvoxamine treatment in the absence of anti-psychotic co-administration. These serious and sometimes fatal events can include hyperthermia, muscle rigidity, autonomic instability with possible rapid fluctuations of vital signs, and mental status changes. As these events may result in potentially life-threatening conditions, patients receiving this combination of therapy should be monitored for the emergence of NMS-like signs and symptoms. Treatment with fluvoxamine and any concomitant anti-psychotic agent should be discontinued immediately if such events occur and supportive symptomatic treatment should be initiated.

**Theophylline:** The effect of steady-state IR fluvoxamine maleate (50 mg bid) on the PK of a single dose of theophylline (375 mg as 442 mg aminophylline) was evaluated in 12 healthy, non-smoking male volunteers. The clearance of theophylline was decreased ~3-fold; therefore, if theophylline is co-administered with fluvoxamine maleate, its dose should be reduced to 1/3 of the usual daily maintenance dose and plasma concentrations of theophylline should be monitored. No dose adjustment is required for LUVOX CR.

**Warfarin:** When IR fluvoxamine maleate (50 mg three times per day) was administered concomitantly with warfarin for 2 weeks, warfarin plasma concentrations increased 98% and prothrombin times were prolonged. Thus patients receiving oral anticoagulants and LUVOX CR should have their prothrombin time monitored and their anticoagulant dose adjusted accordingly. No dose adjustment is required for LUVOX CR.

**Serotonin Syndrome:** The development of a potentially life-threatening serotonin syndrome may occur with LUVOX CR treatment, particularly with concomitant use of serotonergic drugs (including triptans) or drugs that impair metabolism of serotonin (including MAOIs). Serotonin syndrome symptoms may include mental status changes (eg agitation, hallucinations, coma), autonomic instability (eg tachycardia, labile blood pressure, hyperthermia), neuromuscular aberrations (eg hyperreflexia, incoordination), and/or gastrointestinal (GI) symptoms (eg nausea, vomiting, diarrhea). The concomitant use of LUVOX CR with MAOIs is intended to treat depression is contraindicated (see CONTRAINDICATIONS and WARNINGS—Potential for Interactions with Monoamine Oxidase Inhibitors). If concomitant treatment of LUVOX CR with a 5-hydroxytryptamine receptor agonist (triptan) is clinically warranted, careful observation of the patient is advised, particularly during treatment initiation and dose increase (see PRECAUTIONS—Drug Interactions). Concomitant use of fluvoxamine with serotonin precursors (such as tryptophan) is not recommended (see PRECAUTIONS—Drug Interactions).

**PRECAUTIONS: General—Discontinuation of Treatment with LUVOX CR:** During marketing of IR fluvoxamine maleate and other SSRIs and SNRIs, there have been spontaneous reports of adverse events (AEs) occurring upon discontinuation of these drugs, particularly when abrupt, including the following: dysphoric mood, irritability, agitation, dizziness, sensory disturbances (eg paresthesias, such as electric shock sensations), anxiety, confusion, headache, lethargy, emotional lability, insomnia, and hypomania. While these events are generally self-limiting, there have been reports of serious discontinuation syndromes. Patients should be monitored for these symptoms when discontinuing treatment with LUVOX CR. A gradual reduction in dose rather than abrupt cessation is recommended whenever possible. If intolerable symptoms occur following a decrease in the dose or on discontinuation of treatment, then resuming the previously prescribed dose may be considered. Subsequently, the health care provider may continue decreasing the dose but at a more gradual rate (see DOSAGE AND ADMINISTRATION).

**Abnormal Bleeding:** SSRIs and SNRIs, including LUVOX CR, may increase the risk of bleeding events. Concomitant use of aspirin, nonsteroidal anti-inflammatory drugs (NSAIDs), warfarin, and other anticoagulants may add to this risk. Case reports and epidemiological studies (case-control and cohort design)



have demonstrated an association between use of drugs that interfere with serotonin reuptake and the occurrence of GI bleeding. Bleeding events related to use of SSRIs and SNRIs have ranged from ecchymoses, hematomas, epistaxis, and petechiae to life-threatening hemorrhages. Patients should be cautioned about the risk of bleeding associated with the concomitant use of LUVOX CR and NSAIDs, aspirin, or other drugs that affect coagulation. **Activation of Mania/Hypomania:** During premarketing studies of IR fluvoxamine maleate involving primarily depressed patients, hypomania or mania occurred in ~1% of patients treated with fluvoxamine. In a 10-week pediatric OCD study, 2 out of 57 patients (4%) treated with fluvoxamine experienced manic reactions, compared to none of 63 placebo patients. Activation of mania/hypomania has also been reported in a small proportion of patients with major affective disorder who were treated with other antidepressants. As with all antidepressants, LUVOX CR should be used cautiously in patients with a history of mania. **Seizures:** During premarketing studies with IR fluvoxamine maleate, seizures were reported in 0.2% of fluvoxamine-treated patients. Caution is recommended when the drug is administered to patients with a history of convulsive disorders. Fluvoxamine should be avoided in patients with unstable epilepsy, and patients with controlled epilepsy should be carefully monitored. Treatment with fluvoxamine should be discontinued if seizures occur or seizure frequency increases. **Hyponatremia:** Hyponatremia may occur as a result of treatment with SSRIs and SNRIs, including LUVOX CR. In many cases, this hyponatremia appears to be the result of the syndrome of inappropriate antidiuretic hormone secretion (SIADH). Cases with serum sodium lower than 110 mmol/L have been reported. Elderly patients may be at greater risk of developing hyponatremia with SSRIs and SNRIs. Also, patients taking diuretics or who are otherwise volume depleted may be at greater risk (see **Geriatric Use**). Discontinuation of LUVOX CR should be considered in patients with symptomatic hyponatremia and appropriate medical intervention should be instituted. Signs and symptoms of hyponatremia include headache, difficulty concentrating, memory impairment, confusion, weakness, and unsteadiness, which may lead to falls. Signs and symptoms associated with more severe and/or acute cases have included hallucination, syncope, seizure, coma, respiratory arrest, and death. **Use in Patients with Concomitant Illness:** Closely monitored clinical experience with IR fluvoxamine maleate in patients with concomitant systemic illness is limited. Caution is advised in administering LUVOX CR to patients with diseases or conditions that could affect hemodynamic responses or metabolism. LUVOX CR or IR fluvoxamine maleate have not been evaluated or used to any appreciable extent in patients with a recent history of myocardial infarction or unstable heart disease. Patients with these diagnoses were systematically excluded from many clinical studies during premarket testing. Evaluation of the electrocardiograms (ECGs) for patients with depression or OCD who participated in premarketing studies revealed no differences between fluvoxamine and placebo in the emergence of clinically important ECG changes. In patients with liver dysfunction, following administration of IR fluvoxamine maleate, fluvoxamine clearance was decreased by ~30%. Patients with liver dysfunction should begin with a low dose of LUVOX CR and increase it slowly with careful monitoring. **Laboratory Tests:** There are no specific laboratory tests recommended. **Drug Interactions:** As with all drugs, the potential for interaction by a variety of mechanisms is a possibility. **Potential Interactions with Drugs that Inhibit or are Metabolized by Cytochrome P450 Isoenzymes:** Multiple hepatic cytochrome P450 isoenzymes are involved in the oxidative biotransformation of a large number of structurally different drugs and endogenous compounds. The available knowledge concerning the relationship of fluvoxamine and the cytochrome P450 isoenzyme system has been obtained mostly from PK interaction studies conducted in healthy volunteers, but some preliminary *in vitro* data are also available. Based on a finding of substantial interactions of fluvoxamine with certain of these drugs (see **WARNINGS**) and limited *in vitro* data for CYP3A4, it appears that fluvoxamine inhibits several cytochrome P450 isoenzymes known to be involved in the metabolism of other drugs such as CYP1A2 (eg warfarin, theophylline, propranolol, tizanidine), CYP2C9 (eg warfarin), CYP3A4 (eg alprazolam), and CYP2C19 (eg omeprazole). *In vitro* data suggest that fluvoxamine is a relatively weak inhibitor of CYP2D6. Approximately 7% of the normal population has a genetic code that leads to reduced levels of activity of CYP2D6 enzyme. Such individuals have been referred to as poor metabolizers (PMs) of drugs such as debrisoquin, dextromethorphan, and tricyclic antidepressants. While none of the drugs studied for drug interactions significantly affected the PK of fluvoxamine, an *in vivo* study of fluvoxamine single-dose PK in 13 PM subjects demonstrated altered PK properties compared to 16 extensive metabolizers (EMs): mean  $C_{max}$ , AUC, and  $T_{1/2}$  were increased by 52%, 200%, and 62%, respectively, in the PM compared to the EM group. This suggests that fluvoxamine is metabolized, at least in part, by CYP2D6. Caution is indicated in patients known to have reduced levels of cytochrome P450 2D6 activity or receiving concomitant drugs known to inhibit this cytochrome P450 isoenzyme (eg quinidine). The metabolism of fluvoxamine has not been fully characterized, and the effects of potent cytochrome P450 isoenzyme inhibition, such as the ketoconazole inhibition of CYP3A4, on fluvoxamine metabolism have not been studied. A clinically significant fluvoxamine interaction is possible with drugs having a narrow therapeutic ratio such as warfarin or theophylline, certain benzodiazepines, and phenytoin. If LUVOX CR is to be administered together with a drug that is eliminated via oxidative metabolism and has a narrow therapeutic window, plasma levels and/or PD effects of the latter drug should be monitored closely, at least until steady-state conditions are reached (see **CONTRAINDICATIONS** and **WARNINGS**). **CNS Active Drugs: Antipsychotics:** See **WARNINGS—Other Potentially Important Drug Interactions, NMS or NMS-Like Events**. **MAOIs:** See **CONTRAINDICATIONS** and **WARNINGS**. **Alprazolam and Diazepam:** See **WARNINGS**. **Alcohol:** Studies involving single 40 g doses of ethanol (oral administration in 1 study and intravenous in the other) and multiple dosing with IR fluvoxamine maleate (50 mg bid) revealed no effect of either drug on the PK or PD of the other. **Carbamazepine:** Elevated carbamazepine levels and symptoms of toxicity have been reported with the co-administration of IR fluvoxamine maleate and carbamazepine. **Clozapine:** Elevated serum levels of clozapine have been reported in patients taking IR fluvoxamine maleate and clozapine. Since clozapine-related seizures and orthostatic hypotension appear to be dose related, the risk of these AEs may be higher when fluvoxamine and clozapine are co-administered. Patients should be closely monitored when LUVOX CR and clozapine are used concurrently. **Lithium:** As with other serotonergic drugs, lithium may enhance the serotonergic effects of fluvoxamine and, therefore, the combination should be used with caution. Seizures have been reported with the co-administration of IR fluvoxamine maleate and lithium. **Lorazepam:** A study of multiple doses of IR fluvoxamine maleate (50 mg bid) and a 4 mg single dose of lorazepam in healthy male volunteers (n=12) indicated no significant PK interaction. On average, both lorazepam alone and lorazepam with fluvoxamine produced substantial decrements in cognitive functioning; however, the co-administration of fluvoxamine and lorazepam did not produce larger mean decrements compared to lorazepam alone. **Methadone:** Significantly increased methadone (plasma level:dose) ratios have been reported when IR fluvoxamine maleate was administered to patients receiving maintenance methadone treatment, with symptoms of opioid intoxication in 1 patient. Opioid withdrawal symptoms were reported following fluvoxamine maleate discontinuation in another patient. **Ramelteon:** When IR fluvoxamine maleate 100 mg bid was administered for 3 days prior to single-dose co-administration of ramelteon 16 mg and IR fluvoxamine maleate, the AUC for ramelteon increased ~190-fold and the  $C_{max}$  increased ~70-fold compared to ramelteon administered alone. Ramelteon should not be used in combination with LUVOX CR (see **WARNINGS**). **Serotonergic Drugs:** Based on the mechanism of action of LUVOX CR and the potential for serotonin syndrome, caution is advised when fluvoxamine is co-administered with other drugs that may affect the serotonergic neurotransmitter systems, such as triptans, linezolid (an antibiotic which is a reversible non-selective MAOI), lithium, tramadol, or St. John's Wort (see **WARNINGS—Serotonin Syndrome**). The concomitant use of LUVOX CR with other SSRIs, SNRIs, or tryptophan is not recommended. **Sumatriptan:** Rare postmarketing reports have described patients with weakness, hyperreflexia, and incoordination following the use of an SSRI and sumatriptan. If concomitant treatment with sumatriptan and an SSRI (eg fluoxetine, fluvoxamine, paroxetine, sertraline, etc.) is clinically warranted, appropriate observation of the patient is advised. **Tacrine:** In a study of 13 healthy male volunteers, a single 40 mg dose of tacrine added to IR fluvoxamine maleate 100 mg/day administered at steady state was associated with 5- and 8-fold increases in tacrine  $C_{max}$  and AUC, respectively, compared to the administration of tacrine alone. Five subjects experienced nausea, vomiting, sweating, and diarrhea following co-administration, consistent with the cholinergic effects of tacrine. **Thioridazine:** See **CONTRAINDICATIONS** and **WARNINGS**. **Triptans:** There have been rare postmarketing reports of serotonin syndrome with use of an SSRI and a triptan.

If concomitant treatment of fluvoxamine with a triptan is clinically warranted, careful observation of the patient is advised, particularly during treatment initiation and dose increases (see **WARNINGS—Serotonin Syndrome**). **Tizanidine:** See **CONTRAINDICATIONS** and **WARNINGS**. **Tricyclic Antidepressants (TCAs):** Significantly increased plasma TCA levels have been reported with co-administration of IR fluvoxamine maleate and amitriptyline, clomipramine, or imipramine. Caution is indicated with the co-administration of LUVOX CR and TCAs; plasma TCA concentrations may need to be monitored, and the dose of TCA may need to be reduced. **Tryptophan:** Tryptophan may enhance the serotonergic effects of fluvoxamine, and the combination should, therefore, be used with caution. Severe vomiting has been reported with co-administration of IR fluvoxamine maleate and tryptophan. **Other Drugs: Theophylline and Warfarin:** See **WARNINGS**. **Allosteron:** Because allosteron is metabolized by a variety of hepatic CYP drug metabolizing enzymes, inducers or inhibitors of these enzymes may change the clearance of allosteron. Fluvoxamine is a known potent inhibitor of CYP1A2 and also inhibits CYP3A4, CYP2C9, and CYP2C19. In a PK study, 40 healthy female subjects received fluvoxamine in escalating doses from 50 mg to 200 mg a day for 16 days, with co-administration of allosteron 1 mg on the last day. Fluvoxamine increased mean allosteron plasma concentration (AUC) ~6-fold and prolonged the half-life by ~3 fold (see **CONTRAINDICATIONS**, **PRECAUTIONS**, and Lotronex™ (allosteron) package insert). **Digoxin:** Administration of IR fluvoxamine maleate 100 mg daily for 18 days (n=8) did not significantly affect the PK of a 1.25 mg single intravenous dose of digoxin. **Diltiazem:** Bradycardia has been reported with the co-administration of IR fluvoxamine maleate and diltiazem. **Propranolol and Other Beta-Blockers:** Co-administration of IR fluvoxamine maleate 100 mg per day and propranolol 160 mg per day in normal volunteers resulted in a mean 5-fold increase (range 2- to 17-fold) in minimum propranolol plasma concentrations. In this study, there was a slight potentiation of the propranolol-induced reduction in heart rate and reduction in the exercise diastolic pressure. One case of bradycardia and hypotension and a second case of orthostatic hypotension have been reported with co-administration of IR fluvoxamine maleate and metoprolol. If propranolol or metoprolol is co-administered with LUVOX CR, a reduction in the initial beta-blocker dose and more cautious dose titration are recommended. No dose adjustment is required for LUVOX CR. Co-administration of IR fluvoxamine maleate 100 mg per day with atenolol 100 mg per day (n=6) did not affect the plasma concentrations of atenolol. Unlike propranolol and metoprolol, which undergo hepatic metabolism, atenolol is eliminated primarily by renal excretion. **Drugs that Interfere with Hemostasis (eg NSAIDs, Aspirin, and Warfarin):** Serotonin release by platelets plays an important role in hemostasis. Epidemiological studies of the case-control and cohort design have demonstrated an association between use of psychotropic drugs that interfere with serotonin reuptake and the occurrence of upper GI bleeding. These studies have also shown that concurrent use of an NSAID or aspirin may potentiate this risk of bleeding. Altered anticoagulant effects, including increased bleeding, have been reported when SSRIs or SNRIs are co-administered with warfarin. Patients receiving warfarin therapy should be carefully monitored when LUVOX CR is initiated or discontinued. **Effects of Smoking on Fluvoxamine Metabolism:** Smokers had a 25% increase in the metabolism of fluvoxamine compared to nonsmokers. **Electroconvulsive Therapy (ECT):** No clinical studies have established the benefits or risks of combined use of ECT and fluvoxamine maleate. **Carcinogenesis, Mutagenesis, Impairment of Fertility: Carcinogenesis:** There was no evidence of carcinogenicity in rats treated orally with fluvoxamine maleate for 30 months or hamsters treated orally with fluvoxamine maleate for 20 months (females) or 26 months (males). The daily doses in the high-dose groups in these studies were increased over the course of the study from a minimum of 160 mg/kg to a maximum of 240 mg/kg in rats, and from a minimum of 135 mg/kg to a maximum of 240 mg/kg in hamsters. The maximum dose of 240 mg/kg is ~6 times the maximum human daily dose on a  $mg/m^2$  basis. **Mutagenesis:** No evidence of genotoxic potential was observed in a mouse micronucleus test, an *in vitro* chromosome aberration test, or the Ames microbial mutagen test with or without metabolic activation. **Impairment of Fertility:** In a study in which male and female rats were administered fluvoxamine (60, 120, or 240 mg/kg) orally prior to and during mating and gestation, fertility was impaired at oral doses  $\geq 120$  mg/kg, as evidenced by increased latency to mating, decreased sperm count, decreased epididymal weight, and decreased pregnancy rate. In addition, the numbers of implantations and embryos were decreased at the highest dose. The no effect dose for fertility impairment was 60 mg/kg (~2 times the maximum recommended human dose [MRHD] on a  $mg/m^2$  basis). **Pregnancy—Teratogenic Effects—Pregnancy Category C:** When pregnant rats were given oral doses of fluvoxamine (60, 120, or 240 mg/kg) throughout the period of organogenesis, developmental toxicity in the form of increased embryofetal death and increased incidences of fetal eye abnormalities (folded retinas) was observed at doses  $\geq 120$  mg/kg. Decreased fetal body weight was seen at the high dose. The no effect dose for developmental toxicity in this study was 60 mg/kg (~2 times the MRHD on a  $mg/m^2$  basis). In a study in which pregnant rabbits were administered oral doses of up to 40 mg/kg (~2 times the MRHD on a  $mg/m^2$  basis) during organogenesis, no adverse effects on embryofetal development were observed. In other reproductive studies in which female rats were dosed orally during pregnancy and lactation (5, 20, 80, or 160 mg/kg), increased pup mortality at birth was seen at  $\geq 80$  mg/kg, and decreases in pup body weight and survival were observed at all doses (low effect dose ~0.1 times the MRHD on a  $mg/m^2$  basis). **Nonteratogenic Effects:** Neonates exposed to IR fluvoxamine maleate and other SSRIs or SNRIs late in the third trimester have developed complications requiring prolonged hospitalization, respiratory support, and tube feeding. These findings are based on postmarketing reports. Complications can arise immediately upon delivery. Reported clinical findings have included respiratory distress, cyanosis, apnea, seizures, temperature instability, feeding difficulty, vomiting, hypoglycemia, hypotonia, hypertonia, hyperreflexia, tremor, jitteriness, irritability, and constant crying. These features are consistent with either a direct toxic effect of SSRIs or SNRIs or, possibly, a drug discontinuation syndrome. It should be noted that, in some cases, the clinical picture is consistent with serotonin syndrome (see **WARNINGS**). Infants exposed to SSRIs in late pregnancy may have an increased risk for persistent pulmonary hypertension of the newborn (PPHN). PPHN is associated with substantial neonatal morbidity and mortality. In a case-control study of 377 women whose infants were born with PPHN and 836 women whose infants were born healthy, the risk for developing PPHN was ~6 fold higher for infants exposed to SSRIs after the 20th week of gestation compared to infants who had not been exposed to antidepressants during pregnancy. PPHN occurs in 1-2 per 1000 live births in the general population. When treating a pregnant woman with LUVOX CR during the third trimester, the physician should carefully consider both the potential risks and benefits of treatment (see **DOSE AND ADMINISTRATION**). Physicians should note that in a prospective longitudinal study of 201 women with a history of major depression who were euthymic at the beginning of pregnancy, women who discontinued antidepressant medication during pregnancy were more likely to experience a relapse of major depression than women who continued antidepressant medication. **Labor and Delivery:** The effect of fluvoxamine on labor and delivery in humans is unknown. **Nursing Mothers:** Fluvoxamine is secreted in human breast milk. Because of the potential for serious adverse reactions in nursing infants, a decision should be made whether to discontinue nursing or discontinue the drug, taking into account the importance of the drug to the mother. **Pediatric Use:** LUVOX CR has not been evaluated in pediatric patients (see **BOXED WARNING**). The efficacy of IR fluvoxamine maleate for the treatment of OCD was demonstrated in a 10-week multicenter placebo-controlled study with 120 outpatients ages 8-17. In addition, 99 of these outpatients continued open-label fluvoxamine maleate treatment for up to another 1 to 3 years, equivalent to 94 patient years. The AE profile observed in that study was generally similar to that observed in adult studies with IR fluvoxamine maleate (see **ADVERSE REACTIONS** and **DOSE AND ADMINISTRATION**). Decreased appetite and weight loss have been observed in association with the use of fluvoxamine as well as other SSRIs. Consequently, regular monitoring of weight and growth is recommended if treatment of a child with an SSRI is to be continued long term. The risks, if any, that may be associated with fluvoxamine's extended use in children and adolescents with OCD have not been systematically assessed. The prescriber should be mindful that the evidence relied upon to conclude that fluvoxamine is safe for use in children and adolescents derives from relatively short-term clinical studies and from extrapolation of experience gained with adult patients. In particular, no studies directly evaluated the effects of long-term fluvoxamine use on the growth, cognitive behavioral development, and maturation of children and adolescents. Although there is no affirmative finding to suggest that fluvoxamine possesses a capacity to adversely affect growth, development, or maturation, the absence of such findings is not compelling evidence of the absence of the potential of fluvoxamine to have

adverse effects in chronic use (see **WARNINGS—Clinical Worsening and Suicide Risk**). Safety and effectiveness in the pediatric population other than pediatric patients with OCD have not been established (see **BOXED WARNING and WARNINGS—Clinical Worsening and Suicide Risk**). Anyone considering the use of LUVOX CR in a child or adolescent must balance the potential risks with the clinical need. **Geriatric Use:** Approximately 230 patients and 5 patients participating in controlled premarketing studies with IR fluvoxamine maleate and LUVOX CR, respectively, were 65 years of age or over. No overall differences in safety were observed between these patients and younger patients. Other reported clinical experience has not identified differences in response between the elderly and younger patients. However, SSRIs and SNRIs, including LUVOX CR, have been associated with cases of clinically significant hyponatremia in elderly patients, who may be at greater risk for this AE (see **PRECAUTIONS—Hyponatremia**). Furthermore, the clearance of fluvoxamine is decreased by about 50% in elderly compared to younger patients (see **Pharmacokinetics under CLINICAL PHARMACOLOGY**), and greater sensitivity of some older individuals also cannot be ruled out. Consequently, LUVOX CR should be slowly titrated during initiation of therapy. **ADVERSE REACTIONS—Associated with Discontinuation of Treatment:** Of the 279 patients with SAD and 124 patients with OCD treated with LUVOX CR in controlled clinical trials, 26% and 19% discontinued treatment due to an AE. The most common AEs ( $\geq 1\%$ ) associated with discontinuation and considered to be drug related (ie those events associated with dropout at a rate at least twice that of placebo) were as follows: *In patients with SAD—Body as a Whole:* asthenia (4%), headache (3%), abdominal pain (1%); *Digestive:* nausea (8%), diarrhea (3%), anorexia (2%); *Nervous System:* insomnia (5%), somnolence (5%), anxiety (4%), dizziness (4%), abnormal thinking (2%), nervousness (2%), depression (1%), agitation (1%), paresthesia (1%), tremor (1%); *Skin and Appendages:* sweating (1%). *In patients with OCD—Body as a Whole:* asthenia (2%), pain (2%); *Digestive:* nausea (6%), diarrhea (2%), dyspepsia (2%); *Nervous System:* insomnia (5%), somnolence (4%), anxiety (2%), dizziness (3%). **Commonly Observed AEs:** LUVOX CR has been studied in 2 controlled trials of SAD (n=279) and 1 trial of OCD (n=124). In general, AE rates were similar in the 2 data sets as well as in a study of pediatric patients with OCD treated with IR fluvoxamine maleate. The most commonly observed AEs associated with the use of LUVOX CR and likely to be drug-related (incidence  $\geq 5\%$  and at least twice that for placebo) were nausea, somnolence, asthenia, diarrhea, anorexia, abnormal ejaculation, tremor, sweating, and anorgasmia. In addition, the following AEs occurred in the SAD population: insomnia, dizziness, dyspepsia, yawn. In the OCD population, the following additional events occurred: decreased libido, anxiety, pharyngitis, vomiting, myalgia, and accidental injury. **AEs Occurring at an Incidence of 2%:** The following AEs occurred in adults at a frequency of  $\geq 2\%$ , and were more frequent than in the placebo group, among adult patients with SAD (n=279) treated once daily with 100 to 300 mg/day LUVOX CR in two 12-week controlled trials: *Body as a Whole:* headache (35%), asthenia (24%), abdominal pain (5%), chest pain (3%); *Cardiovascular:* palpitation (3%), vasodilatation (2%); *Digestive:* nausea (39%), diarrhea (14%), anorexia (14%), dyspepsia (10%), constipation (6%), liver function test abnormal (2%); *Nervous System:* insomnia (32%), somnolence (26%), dizziness (15%), dry mouth (11%), nervousness (10%), decreased libido (6%) [male (8%), female (4%)], anxiety (8%), tremor (8%), abnormal thinking (3%), abnormal dreams (3%), agitation (3%), hypertension (2%), paresthesia (3%); *Respiratory System:* yawn (5%), bronchitis (2%); *Skin and Appendages:* sweating (6%); *Special Senses:* taste perversion (2%); *Urogenital:* abnormal ejaculation (11%), anorgasmia (5%) [male (4%), female (5%)], sexual function abnormal (3%) [male (2%), female (3%)], urinary tract infection (2%). The following AEs occurred at a frequency of  $\geq 2\%$ , and were more frequent than in the placebo group, among adult patients with OCD (n=124) treated once daily with 100 to 300 mg/day LUVOX CR in one 12-week controlled trial: *Body as a Whole:* headache (32%), asthenia (26%), pain (10%), accidental injury (5%), viral infection (2%); *Cardiovascular:* hypertension (2%); *Digestive:* nausea (34%), diarrhea (18%), anorexia (13%), dyspepsia (8%), constipation (4%), vomiting (6%), tooth disorder (2%), gingivitis (2%); *Hemic and Lymphatic:* ecchymosis (4%); *Metabolic and Nutritional Disorders:* weight loss (2%); *Musculoskeletal:* myalgia (5%); *Nervous System:* insomnia (35%), somnolence (27%), dizziness (12%), dry mouth (10%), decreased libido (6%) [male (10%), female (4%)], anxiety (6%), tremor (6%), abnormal thinking (3%), agitation (2%), apathy (3%), neurosis (2%), twitching (2%); *Respiratory System:* pharyngitis (6%), yawn (2%), laryngitis (3%), epistaxis (2%); *Skin:* sweating (7%), acne (2%); *Special Senses:* taste perversion (2%), amblyopia (2%); *Urogenital:* abnormal ejaculation (10%), anorgasmia (5%) [male (4%), female (5%)], menorrhagia (3%), sexual function abnormal (2%) [male (4%), female (0%)], polyuria (2%). These lists include the percentages of patients in each group who had at least 1 occurrence of an event during treatment. Reported AEs were classified using a COSTART-based Dictionary terminology. **Other AEs in OCD Pediatric Population:** In pediatric patients (n=57) treated with IR fluvoxamine maleate, the overall profile of AEs was generally similar to that seen in adult studies, as shown above. However, the following AEs, not shown above, were reported in 2 or more of the pediatric patients and were more frequent with IR fluvoxamine maleate than with placebo: cough increase, dysmenorrhea, emotional lability, fever, flatulence, flu syndrome, hyperkinesia, infection, manic reaction, rash, rhinitis, and sinusitis. **Male and Female Sexual Dysfunction with SSRIs:** Although changes in sexual desire, sexual performance, and sexual satisfaction often occur as manifestations of a psychiatric disorder and with aging, they may also be a consequence of pharmacologic treatment. In particular, some evidence suggests that SSRIs can cause such untoward sexual experiences. Reliable estimates of the incidence and severity of untoward experiences involving sexual desire, performance, and satisfaction are difficult to obtain, however, in part because patients and health care providers may be reluctant to discuss them. Accordingly, estimates of the incidence of untoward sexual experience and performance cited in product labeling are likely to underestimate their actual incidence. The following sexual side effects were reported by  $\geq 2\%$  of patients taking LUVOX CR in placebo-controlled trials of SAD and OCD: abnormal ejaculation (11%), anorgasmia [male (4%), female (5%)], impotence (2%), decreased libido [male (8%), female (4%)], sexual function abnormal [male (3%), female (2%)]. Fluvoxamine treatment has been associated with several cases of priapism. In those cases with a known outcome, patients recovered without sequelae and upon discontinuation of fluvoxamine. While it is difficult to know the precise risk of sexual dysfunction associated with the use of SSRIs, health care providers should routinely inquire about such possible side effects. **Changes in Weight, Vital Signs, and Laboratory Tests:** No statistically significant differences in weight gain or loss were found between patients treated with LUVOX CR or placebo. Comparisons of IR fluvoxamine maleate or LUVOX CR versus placebo groups in separate short-term trials on (1) median change from baseline and on (2) incidence of patients meeting criteria for potentially important changes from baseline showed no important differences on various vital signs variables or serum chemistry, hematology, and urinalysis variables. **ECG Changes:** Comparisons of IR fluvoxamine maleate or LUVOX CR and placebo groups in separate pools of short-term OCD and depression trials on (1) mean change from baseline on various ECG variables and on (2) incidence of patients meeting criteria for potentially important changes from baseline on various ECG variables revealed no important differences. **Postmarketing Reports:** Voluntary reports of AEs in patients taking IR fluvoxamine maleate that have been received since market introduction and are of unknown causal relationship to fluvoxamine include acute renal failure, agranulocytosis, amenorrhea, anaphylactic reaction, angioedema, aplastic anemia, bullous eruption, Henoch-Schoenlein purpura, hepatitis, hyponatremia, ileus, laryngismus, neuropathy, pancreatitis, porphyria, priapism, serotonin syndrome, severe akinesia with fever when fluvoxamine was co-administered with anti-psychotic medication, Stevens-Johnson syndrome, toxic epidermal necrolysis, vasculitis, and ventricular tachycardia (including torsades de pointes). **DRUG ABUSE AND DEPENDENCE: Controlled Substance Class—LUVOX CR** is not a controlled substance. **Physical and Psychological Dependence:** The potential for abuse, tolerance, and physical dependence with IR fluvoxamine maleate has been studied in a nonhuman primate model. No evidence of dependency phenomena was found. The discontinuation effects of LUVOX CR were not systematically evaluated in controlled clinical trials. LUVOX CR was not systematically studied in clinical trials for potential for abuse, but there was no indication of drug-seeking behavior in clinical trials. It should be noted, however, that patients at risk for drug dependency were systematically excluded from investigational studies of IR fluvoxamine maleate. Generally, it is not possible to predict on the basis of preclinical or premarketing clinical experience the extent to which a CNS active drug will be misused, diverted, and/or abused once marketed. Consequently, health care providers should carefully evaluate patients for a history of drug abuse and follow such patients closely, observing them for signs of LUVOX CR misuse or abuse (ie development of tolerance, incrementation of dose, drug-seeking behavior). **OVERDOSAGE: Human**

**Experience:** Exposure to IR fluvoxamine maleate includes over 45,000 patients treated in clinical trials and an estimated exposure of 50,000,000 patients treated during worldwide marketing experience (end of 2005). Of the 539 cases of deliberate or accidental overdose involving fluvoxamine reported from this population, there were 55 deaths. Of these, 9 were in patients thought to be taking IR fluvoxamine alone, and the remaining 46 were in patients taking fluvoxamine along with other drugs. Among nonfatal overdose cases, 404 patients recovered completely. Five patients experienced adverse sequelae of overdose, to include persistent mydriasis, unsteady gait, hypoxic encephalopathy, kidney complications (from trauma associated with overdose), bowel infarction requiring a hemicolectomy, and vegetative state. In 13 patients, the outcome was provided as abating at the time of reporting. In the remaining 62 patients, the outcome was unknown. The largest known ingestion of fluvoxamine IR involved 12,000 mg (equivalent to 2 to 3 months' dosage). The patient fully recovered. However, ingestions as low as 1,400 mg have been associated with lethal outcome, indicating considerable prognostic variability. In the controlled clinical trials with 403 patients treated with LUVOX CR, there was 1 nonfatal intentional overdose. Commonly ( $\geq 5\%$ ) observed AEs associated with fluvoxamine maleate overdose include GI complaints (nausea, vomiting, and diarrhea), coma, hypokalemia, hypotension, respiratory difficulties, somnolence, and tachycardia. Other notable signs and symptoms seen with IR fluvoxamine maleate overdose (single or multiple drugs) include bradycardia, ECG abnormalities, (such as heart arrest, QT interval prolongation, first degree atrioventricular block, bundle branch block, and junctional rhythm), convulsions, dizziness, liver function disturbances, tremor, and increased reflexes. **Management of Overdose:** Treatment should consist of those general measures employed in the management of overdose with any antidepressant. Ensure an adequate airway, oxygenation, and ventilation. Monitor cardiac rhythm and vital signs. General supportive and symptomatic measures are also recommended. Induction of emesis is not recommended. Gastric lavage with a large-bore orogastric tube with appropriate airway protection, if needed, may be indicated if performed soon after ingestion, or in symptomatic patients. Activated charcoal should be administered. Due to the large volume of distribution of this drug, forced diuresis, dialysis, hemoperfusion, and exchange transfusion are unlikely to be of benefit. No specific antidotes for fluvoxamine are known. A specific caution involves patients taking, or recently having taken, fluvoxamine maleate who might ingest excessive quantities of a tricyclic antidepressant. In such a case, accumulation of the parent tricyclic and/or an active metabolite may increase the possibility of clinically significant sequelae and extend the time needed for close medical observation (see **Tricyclic Antidepressants (TCAs) under PRECAUTIONS**). In managing overdose, consider the possibility of multiple drug involvement. The health care provider should consider contacting a poison control center for additional information on the treatment of any overdose. Telephone numbers for certified poison control centers are listed in the *Physicians' Desk Reference*. **DOSE AND ADMINISTRATION: SAD and OCD—**The recommended starting dose for LUVOX CR in adults is 100 mg qd. LUVOX CR should be administered, with or without food, as a single daily dose at bedtime. The dose should be increased in 50 mg increments every week, as tolerated, until maximum therapeutic benefit is achieved, not to exceed 300 mg per day. Capsules should not be crushed or chewed. **Special Populations—Dosage for Elderly or Hepatically Impaired Patients:** Elderly patients and those with hepatic impairment have been observed to have a decreased clearance of fluvoxamine maleate. Consequently, it may be appropriate to titrate slowly following the initial dose of 100 mg in these patient groups. **Treatment of Pregnant Women During the Third Trimester:** No neonates have been exposed to LUVOX CR. Neonates exposed to IR fluvoxamine maleate and other SSRIs or SNRIs late in the third trimester have developed complications requiring prolonged hospitalization, respiratory support, and tube feeding (see **PRECAUTIONS**). When treating pregnant women with LUVOX CR during the third trimester, the health care provider should carefully consider the potential risks and benefits of treatment. The health care provider may consider tapering LUVOX CR in the third trimester. **Maintenance/Continuation of Extended Treatment:** Although the efficacy of LUVOX CR beyond 12 weeks of dosing for SAD and OCD has not been documented in controlled trials, SAD and OCD are chronic conditions, and it is reasonable to consider continuation for a responding patient. Dose adjustments should be made to maintain the patient on the lowest effective dose, and patients should be periodically reassessed to determine the need for continued treatment. **Switching Patients To or From a Monoamine Oxidase Inhibitor:** At least 14 days should elapse between discontinuation of an MAOI and initiation of therapy with LUVOX CR. Similarly, at least 14 days should be allowed after stopping LUVOX CR before starting an MAOI. **Discontinuation of Treatment with LUVOX CR:** Symptoms associated with discontinuation of other SSRIs or SNRIs have been reported (see **PRECAUTIONS**). Patients should be monitored for these symptoms when discontinuing treatment. A gradual reduction in the dose rather than abrupt cessation is recommended whenever possible. If intolerable symptoms occur following a decrease in the dose or upon discontinuation of treatment, then resuming the previously prescribed dose may be considered. Subsequently, the health care provider may continue decreasing the dose but at a more gradual rate.

**HOW SUPPLIED: Storage:** LUVOX CR Capsules should be protected from high humidity and stored at 25°C (77°F); excursions permitted to 15°–30°C (59°–86°F) [see USP Controlled Room Temperature]. Avoid exposure to temperatures above 30°C (86°F). Dispense in tight containers. **Keep out of reach of children.**

Lotronex™ is a trademark of GlaxoSmithKline. LUVOX® is a registered trademark of Solvay Pharmaceuticals, Inc. ©2008 Jazz Pharmaceuticals, Inc. Printed in U.S.A. LCR-BPI-01 Rev 0208

**References:** 1. Davidson J, Yaryura-Tobias J, DuPont R, et al. Fluvoxamine-controlled release formulation for the treatment of generalized social anxiety disorder. *J Clin Psychopharmacol.* 2004;24:118-125. 2. Westenberg HGM, Stein DJ, Yang H, et al. A double-blind placebo-controlled study of controlled release fluvoxamine for the treatment of generalized social anxiety disorder. *J Clin Psychopharmacol.* 2004;24:49-55. 3. Hollander E, Koran LM, Goodman WK, et al. A double-blind, placebo-controlled study of the efficacy and safety of controlled-release fluvoxamine in patients with obsessive-compulsive disorder. *J Clin Psychiatry.* 2003;64:640-647. 4. Luvox CR Prescribing Information. Jazz Pharmaceuticals, Inc., Palo Alto, CA; 2008.

**LUVOX CR**  
fluvoxamine maleate extended-release capsules





# REALIZE THE POSSIBILITIES

*Gina, 37*

Real Patient, Manager

Diagnosis: Bipolar Disorder

Last Episode: Mixed

■ Effectively treats acute manic and mixed episodes

■ Well-established tolerability profile

GEODON is indicated for the treatment of acute manic or mixed episodes associated with bipolar disorder, with or without psychotic symptoms.

**Elderly patients with dementia-related psychosis treated with antipsychotic drugs are at an increased risk of death compared to placebo. GEODON is not approved for the treatment of patients with dementia-related psychosis.**

GEODON is contraindicated in patients with a known history of QT prolongation, recent acute myocardial infarction, or uncompensated heart failure, and should not be used with certain other QT-prolonging drugs. GEODON has been associated with prolongation of the QT<sub>c</sub> interval. In some drugs, QT prolongation has been associated with torsade de pointes, a potentially fatal arrhythmia. Patients who are at risk for electrolyte disturbances should have baseline measurements performed before initiating GEODON. Patients on diuretics should be monitored.

As with all antipsychotic medications, a rare and potentially fatal condition known as neuroleptic malignant syndrome (NMS) has been reported with GEODON. NMS can cause hyperpyrexia, muscle rigidity, diaphoresis, tachycardia, irregular pulse or blood pressure, cardiac dysrhythmia, and altered mental status. If signs and symptoms appear, immediate discontinuation, treatment, and monitoring are recommended.

■ Target 120–160 mg/day on Day 2

■ Initiate dosing at 80 mg/day with meals

Prescribing should be consistent with the need to minimize tardive dyskinesia (TD), a potentially irreversible dose- and duration-dependent syndrome. If signs and symptoms appear, discontinuation should be considered since TD may remit partially or completely.

Hyperglycemia-related adverse events, sometimes serious, have been reported in patients treated with atypical antipsychotics. There have been few reports of hyperglycemia or diabetes in patients treated with GEODON, and it is not known if GEODON is associated with these events. Patients treated with an atypical antipsychotic should be monitored for symptoms of hyperglycemia.

Precautions include the risk of rash, orthostatic hypotension, and seizures.

The most common adverse events associated with GEODON in bipolar mania were somnolence, extrapyramidal symptoms, dizziness, akathisia, and abnormal vision.

In short-term schizophrenia clinical trials, 10% of GEODON-treated patients experienced a weight gain of  $\geq 7\%$  of body weight vs 4% for placebo.

Individual results may vary.

Please see brief summary of prescribing information on adjacent page.

For more information, please visit [www.pfizerpro.com/GEODON](http://www.pfizerpro.com/GEODON)

**GEODON**<sup>®</sup>  
(ziprasidone HCl) Capsules



**BRIEF SUMMARY.** See package insert for full prescribing information.

**Increased Mortality in Elderly Patients with Dementia-Related Psychosis**—Elderly patients with dementia-related psychosis treated with antipsychotic drugs are at an increased risk of death. Analyses of seventeen placebo-controlled trials (modal duration of 10 weeks), largely in patients taking atypical antipsychotic drugs, revealed a risk of death in drug-treated patients of between 1.6 to 1.7 times the risk of death in placebo-treated patients. Over the course of a typical 10-week controlled trial, the rate of death in drug-treated patients was about 4.5%, compared to a rate of about 2.8% in the placebo group. Although the causes of death were varied, most of the deaths appeared to be either cardiovascular (e.g., heart failure, sudden death) or infectious (e.g., pneumonia) in nature. Observational studies suggest that, similar to atypical antipsychotic drugs, treatment with conventional antipsychotic drugs may increase mortality. The extent to which the findings of increased mortality in observational studies may be attributed to the antipsychotic drug as opposed to some characteristic(s) of the patients is not clear. Geodon (ziprasidone) is not approved for the treatment of patients with Dementia-Related Psychosis (see WARNINGS).

**INDICATIONS**—GEODON Capsules is indicated for the treatment of schizophrenia and acute manic or mixed episodes associated with bipolar disorder with or without psychotic features. GEODON (ziprasidone mesylate) for Injection is indicated for acute agitation in schizophrenic patients.

**CONTRAINDICATIONS**—**QT Prolongation:** Because of GEODON's dose-related prolongation of the QT interval and the known association of fatal arrhythmias with QT prolongation by some other drugs, GEODON is contraindicated in patients with a known history of QT prolongation (including congenital long QT syndrome), with recent acute myocardial infarction, or with uncompensated heart failure (see WARNINGS). Pharmacokinetic-pharmacodynamic studies between GEODON and other drugs that prolong the QT interval have not been performed. An additive effect of GEODON and other drugs that prolong the QT interval cannot be excluded. Therefore, GEODON should not be given with dofetilide, sotalol, quinidine, other Class Ia and III antiarrhythmics, mesoridazine, thioridazine, chlorpromazine, droperidol, pimozide, sparfloxacin, gatifloxacin, moxifloxacin, haloperidol, metoprolol, metoprolol succinate, pentamidine, arsenic trioxide, levomethadyl acetate, doxostone mesylate, procainolol, or bupropion. GEODON is also contraindicated with drugs that have demonstrated QT prolongation as one of their pharmacodynamic effects; and have the effect described in the full prescribing information as a contraindication or a boxed or bolded warning (see WARNINGS). GEODON is contraindicated in individuals with a known hypersensitivity to the product. **WARNINGS**—**Increased Mortality in Elderly Patients with Dementia-Related Psychosis:** Elderly patients with dementia-related psychosis treated with antipsychotic drugs are at an increased risk of death. GEODON (ziprasidone) is not approved for the treatment of patients with dementia-related psychosis (see BOXED WARNING). **QT Prolongation and Risk of Sudden Death:** GEODON use should be avoided in combination with other drugs that are known to prolong the QT interval. Additionally, clinicians should be alert to the identification of other drugs that have been consistently observed to prolong the QT interval. Such drugs should not be prescribed with GEODON. A study directly comparing the QT/QTc prolonging effect of GEODON with several other drugs effective in the treatment of schizophrenia was conducted in patient volunteers. The mean increase in QTc from baseline for GEODON ranged from approximately 9 to 14 msec greater than for four of the comparator drugs (risperidone, olanzapine, quetiapine, and haloperidol), but was approximately 14 msec less than the prolongation observed for thioridazine. In this study, the effect of GEODON on QTc length was not augmented by the presence of a metabolic inhibitor (ketoconazole 200 mg bid). In placebo-controlled trials, GEODON increased the QTc interval compared to placebo by approximately 10 msec at the highest recommended daily dose of 160 mg. In clinical trials the electrocardiograms of 2,938 (0.06%) GEODON patients and 1,440 (0.23%) placebo patients revealed QTc intervals exceeding the potentially clinically relevant threshold of 500 msec. In the GEODON patients, neither case suggested a role of GEODON. Some drugs that prolong the QT/QTc interval have been associated with the occurrence of torsades de pointes and with sudden unexplained death. The relationship of QTc prolongation to torsades de pointes is clearest for larger increases (20 msec and greater) but it is possible that smaller QT/QTc prolongations may also increase risk, or increase it in susceptible individuals, such as those with hypokalemia, hypomagnesemia, or genetic predisposition. Although torsades de pointes has not been observed in association with the use of GEODON at recommended doses in premarketing studies, experience is too limited to rule out an increased risk. A study evaluating the QT/QTc prolonging effect of intramuscular GEODON, with intramuscular haloperidol as a control, was conducted in patient volunteers. In the trial, ECGs were obtained at the time of maximum plasma concentration following two injections of GEODON (20 mg then 30 mg) or haloperidol (7.5 mg then 10 mg) given four hours apart. Note that a 30 mg dose of intramuscular GEODON is 50% higher than the recommended therapeutic dose. The mean change in QTc from baseline was calculated for each drug using a sample-based correction that removes the effect of heart rate on the QT interval. The mean increase in QTc from baseline for GEODON was 4.6 msec following the first injection and 12.8 msec following the second injection. The mean increase in QTc from baseline for haloperidol was 6.0 msec following the first injection and 14.7 msec following the second injection. In this study, no patient had a QTc interval exceeding 500 msec. As with other antipsychotic drugs and placebo, sudden unexplained deaths have been reported in patients taking GEODON at recommended doses. The premarketing experience for GEODON did not reveal an excess of mortality for GEODON compared to other antipsychotic drugs or placebo, but the extent of exposure was limited, especially for the drugs used as active controls and placebo. Nevertheless, GEODON's larger prolongation of QTc length compared to several other antipsychotic drugs raises the possibility that the risk of sudden death may be greater for GEODON than for other available drugs for treating schizophrenia. This possibility needs to be considered in deciding among alternative drug products. Certain circumstances may increase the risk of the occurrence of torsades de pointes and/or sudden death in association with the use of drugs that prolong the QT interval, including (1) bradycardia; (2) hypokalemia or hypomagnesemia; (3) concomitant use of other drugs that prolong the QT interval; and (4) presence of congenital prolongation of the QT interval. GEODON should also be avoided in patients with congenital long QT syndrome and in patients with a history of cardiac arrhythmias (see CONTRAINDICATIONS, and see Drug Interactions under PRECAUTIONS). It is recommended that patients being considered for GEODON treatment who are at risk for significant electrolyte disturbances, hypokalemia in particular, have baseline serum potassium and magnesium measurements. Hypokalemia (and/or hypomagnesemia) may increase the risk of QTc prolongation and arrhythmia. Hypokalemia may result from diuretic therapy, diarrhea, and other causes. Patients with low serum potassium and/or magnesium should be repleted with those electrolytes before proceeding with treatment. It is essential to periodically monitor serum electrolytes in patients for whom diuretic therapy is introduced during GEODON treatment. Persistently prolonged QTc intervals may also increase the risk of further prolongation and arrhythmia, but it is not clear that routine screening ECG measures are effective in detecting such patients. **Rather, GEODON should be avoided in patients with histories of significant cardiovascular illness, eg, QTc prolongation, recent acute myocardial infarction, uncompensated heart failure, or cardiac arrhythmia. GEODON should be discontinued in patients who are found to have persistent QTc measurements >500 msec. Neuroleptic Malignant Syndrome (NMS):** A potentially fatal symptom complex sometimes referred to as Neuroleptic Malignant Syndrome (NMS) has been reported in association with administration of antipsychotic drugs. The management of NMS should include: (1) immediate discontinuation of antipsychotic drugs and other drugs not essential to concurrent therapy; (2) intensive symptomatic treatment and medical monitoring; and (3) treatment of any concomitant serious medical problems for which specific treatments are available. If a patient requires antipsychotic drug treatment after recovery from NMS, the potential reintroduction of drug therapy should be carefully considered. The patient should be carefully monitored, since recurrences of NMS have been reported. **Tardive Dyskinesia (TD):** A syndrome of potentially irreversible, involuntary, dyskinetic movements may develop in patients undergoing treatment with antipsychotic drugs. Although the prevalence of TD appears to be highest among the elderly, especially elderly women, it is impossible to rely upon prevalence estimates to predict, at the inception of antipsychotic treatment, which patients are likely to develop TD. Its signs and symptoms of TD appear in a patient on GEODON, drug discontinuation should be considered. **Hypertension and Diabetes Mellitus:** Hypertension-related adverse events, sometimes serious, have been reported in patients treated with atypical antipsychotics. There have been few reports of hypertension or diabetes in patients treated with GEODON, and it is not known if GEODON is associated with these events. Patients treated with an atypical antipsychotic should be monitored for symptoms of hypertension. **PRECAUTIONS**—**General:** Rash: In premarketing trials, about 5% of GEODON patients developed rash and/or urticaria, with discontinuation of treatment in about one-sixth of these cases. The occurrence of rash was dose related, although the finding might also be explained by longer exposure in higher-dose patients. Several patients with rash had signs and symptoms of associated systemic illness, e.g., elevated WBCs. Most patients improved promptly upon treatment with antihistaminics or steroids and/or upon discontinuation of GEODON, and all patients were reported to recover completely. Upon appearance of rash for which an alternative etiology cannot be identified, GEODON should be discontinued. **Orthostatic Hypotension:** GEODON may induce orthostatic hypotension associated with dizziness, tachycardia, and, in some patients, syncope, especially during the initial dose titration period, probably reflecting its  $\alpha_1$ -adrenoreceptor antagonist properties. Syncope was reported in 0.6% of GEODON patients. GEODON should be used with particular caution in patients with known cardiovascular disease (history of myocardial infarction or ischemic heart disease, heart failure or conduction abnormalities), cerebrovascular disease or conditions that would predispose patients to hypotension (dehydration, hypovolemia, and treatment with antihypertensive medications). **Seizures:** In clinical trials, seizures occurred in 0.4% of GEODON patients. There were confounding factors that may have contributed to seizures in many of these cases. As with other antipsychotic drugs, GEODON should be used cautiously in patients with a history of seizures or with conditions that potentially lower the seizure threshold, e.g., Alzheimer's dementia. Conditions that lower the seizure threshold may be more prevalent in a population of 65 years or older. **Dysphagia:** Esophageal dysmotility and aspiration have been associated with antipsychotic drug use. Aspiration pneumonia is a common cause of morbidity and mortality in elderly patients, in particular those with advanced Alzheimer's dementia, and GEODON and other antipsychotic drugs should be used cautiously in patients at risk for aspiration pneumonia. (See also Boxed WARNING, WARNINGS: Increased Mortality in Elderly Patients with Dementia-Related Psychosis). **Hypotension:** As with other drugs that antagonize dopamine D<sub>2</sub> receptors, GEODON elicits prolactin levels in humans. Tissue culture experiments indicate that approximately one-third of human breast cancers are prolactin dependent in vitro, a factor of potential importance if the prescription of these drugs is contemplated in a patient with previously detected breast cancer. Neither clinical studies nor epidemiologic studies conducted to date have shown an association between chronic administration of this class of drugs and tumorigenesis in humans; the available evidence is considered too limited to be conclusive at this time. **Potential for Cognitive and Motor Impairment:** Somnolence was a commonly reported adverse event in GEODON patients. In the 4- and 6-week placebo-controlled trials, somnolence was reported in 14% of GEODON patients vs 7% of placebo patients. Somnolence led to discontinuation in 0.3% of patients in short-term clinical trials. Since GEODON has the potential to impair judgment, thinking, or motor skills, patients should be cautioned about performing activities requiring mental alertness, such as operating a motor vehicle (including automobiles) or operating hazardous machinery until they are reasonably certain that GEODON therapy does not affect them adversely. **Pruritus:** One case of pruritus was reported in the premarketing database. **Body Temperature Regulation:** Although not reported with GEODON in premarketing trials, disruption of the body's ability to reduce core body temperature has been attributed to antipsychotic agents. **Suicide:** The possibility of a suicide attempt is inherent in psychotic illness and close supervision of high-risk patients should accompany drug therapy. GEODON prescriptions should be written for the smallest quantity of capsules consistent with good patient management to reduce overdose risk. Use in Patients with Concomitant Illness: Clinical experience with GEODON in patients with certain concomitant systemic illnesses is limited. GEODON has not been evaluated or used to any appreciable extent in patients with a recent history of myocardial infarction or unstable heart disease. Patients with these diagnoses were excluded from premarketing clinical studies. Because of the risk of QTc prolongation and orthostatic hypotension with GEODON, caution should be observed in cardiac patients (see QT Prolongation and Risk of Sudden Death WARNINGS and Orthostatic Hypotension in PRECAUTIONS). **Information for Patients:** To ensure safe and effective use of GEODON, the

information and instructions in the Patient Information Section should be discussed with patients. **Laboratory Tests:** Patients being considered for GEODON treatment who are at risk of significant electrolyte disturbances should have baseline serum potassium and magnesium measurements. Low serum potassium and magnesium should be repleted before treatment. Patients who are started on diuretics during GEODON therapy need periodic monitoring of serum potassium and magnesium. Discontinue GEODON in patients who are found to have persistent QTc measurements >500 msec (see WARNINGS). **Drug Interactions:** (1) GEODON should not be used with any drug that prolongs the QT interval. (2) Give the primary CNS effects of GEODON, caution should be used when it is taken in combination with other centrally acting drugs. (3) Because of the potential for inducing hypotension, GEODON may enhance the effects of certain antihypertensive agents. (4) GEODON may antagonize the effects of levodopa and dopamine agonists. **Effect of Other Drugs on GEODON:** Carbazepine 200 mg qd for 5 days, increased the AUC and C<sub>max</sub> of GEODON by about 35%-40%. Cimetidine 800 mg qd for 2 days, did not affect GEODON pharmacokinetics. Coadministration of 30 mL of Maaloxid did not affect GEODON pharmacokinetics. Population pharmacokinetic analysis of schizophrenic patients in controlled clinical trials has not revealed any clinically significant pharmacokinetic interactions with benzperidone, propranolol, or lorazepam. **Effect of GEODON on Other Drugs:** In vitro studies revealed little potential for GEODON to interfere with the metabolism of drugs cleared primarily by CYP1A2, CYP2C9, CYP2C19, CYP2D6, and CYP3A4, and little potential for drug interactions with GEODON due to displacement. GEODON 40 mg bid administered concomitantly with ibuprofen 400 mg bid for 7 days did not affect the steady-state level or renal clearance of ibuprofen. GEODON 20 mg bid did not affect the pharmacokinetics of concomitantly administered oral carbamazepine ethyl ester (0.03 mg) and levonorgestrel (0.15 mg). Consistent with in vitro results, a study in normal healthy volunteers showed that GEODON did not alter the metabolism of desmethoxythopazine a CYP2D6 model substrate, to its major metabolite, dextropramine. There was no statistically significant change in the urinary dextromethorphan/dextropramine ratio. **Carcinogenesis, Mutagenesis, Impairment of Fertility:** Lifetime carcinogenicity studies were conducted with GEODON in Long Evans rats and CO-1 mice. In male mice, there was no increase in incidence of tumors relative to controls. In female mice there were dose-related increases in the incidences of pituitary gland adenoma and carcinoma, and mammary gland adenocarcinoma at all doses tested. Increases in serum prolactin were observed in a 1-month dietary study in female, but not male, mice. GEODON had no effect on serum prolactin in rats in a 5-week dietary study at the doses that were used in the carcinogenicity study. The relevance for human risk of the findings of prolactin-mediated endocrine tumors in rodents is unknown (see Hypertension). **Mutagenesis:** There was a reproducible mutagenic response in the Ames assay in one strain of *S. typhimurium* in the absence of metabolic activation. Positive results were obtained in both the in vitro mammalian cell gene mutation assay and the in vitro chromosomal aberration assay in human lymphocytes. **Impairment of Fertility:** GEODON increased time to copulation in Sprague Dawley rats in two fertility and early embryonic development studies at doses of 10 to 160 mg/kg/day (0.5 to 8 times the MPRD of 20 mg/kg/day on a mg/m<sup>2</sup> basis). Fertility rate was reduced at 160 mg/kg/day (8 times the MPRD on a mg/m<sup>2</sup> basis). There was no effect on fertility at 40 mg/kg/day (2 times the MPRD on a mg/m<sup>2</sup> basis). The fertility of female rats was reduced. **Pregnancy—Pregnancy Category C:** There are no adequate and well-controlled studies in pregnant women. GEODON should be used during pregnancy only if the potential benefits justifies the potential risk to the fetus. **Labor and Delivery:** The effect of GEODON on labor and delivery in humans is unknown. **Nursing Mothers:** It is not known whether, and if so in what amount, GEODON or its metabolites are excreted in human milk. It is recommended that women receiving GEODON should not breast feed. **Pediatric Use:** The safety and effectiveness of GEODON in pediatric patients have not been established. **Geriatric Use:** Of the approximately 4500 patients treated with GEODON in clinical studies, 2.4% (109) were 65 years of age or over. In general, there was no indication of any different tolerability for GEODON or of reduced clearance of GEODON in the elderly compared to younger adults. Nevertheless, the presence of multiple factors that might increase the pharmacodynamic response to GEODON, or cause poorer tolerance or orthostasis, should lead to consideration of a lower starting dose, slower titration, and careful monitoring during the initial dosing period for some elderly patients. **ADVERSE REACTIONS**—**Premarketing Findings Observed in Short-Term, Placebo-Controlled Trials:** The following findings are based on the short-term placebo-controlled premarketing trials for schizophrenia (a pool of two 6-week, and two 4-week fixed-dose trials) and bipolar mania (a pool of two 3-week flexible-dose trials) in which GEODON was administered in doses ranging from 10 to 200 mg/day. **Adverse Events Associated with Discontinuation:** Schizophrenia: Approximately 4.1% (29/702) of GEODON-treated patients in short-term, placebo-controlled studies discontinued treatment due to an adverse event, compared with about 2.2% (6/273) on placebo. The most common event associated with discontinuation was rash, including 7 dropouts for rash among GEODON patients (1%) compared to no placebo patients (see PRECAUTIONS). Bipolar Mania: Approximately 6.5% (18/279) of GEODON-treated patients in short-term, placebo-controlled studies discontinued treatment due to an adverse event, compared with about 3.7% (5/136) on placebo. The most common events associated with discontinuation in the GEODON-treated patients were akathisia, anxiety, depression, dizziness, dystonia, rash, and vomiting, with 2 dropouts for each of these events among GEODON-treated patients (1%) compared to one placebo patient each for dystonia and rash (1%) and no placebo patients for the remaining adverse events. **Adverse Events at an Incidence >5% and at Least Twice the Rate of Placebo:** The most commonly observed adverse events associated with GEODON in schizophrenia trials were somnolence (14%) and respiratory tract infection (8%). The most commonly observed adverse events associated with the use of GEODON in bipolar mania trials were somnolence (31%), extrapyramidal symptoms (31%), dizziness (16%), akathisia (10%), abnormal vision (6%), asthenia (6%), and vomiting (5%). The following list enumerates the treatment-emergent adverse events that occurred during acute therapy, including only those events that occurred in 2% of GEODON patients and at a greater incidence than in placebo. **Schizophrenia. Body as a Whole**—asthenia, accidental injury, chest pain. **Cardiovascular**—tachycardia. **Digestive**—nausea, constipation, dyspepsia, diarrhea, dry mouth, anorexia. **Nervous**—extrapyramidal symptoms, somnolence, akathisia, dizziness. **Respiratory**—respiratory tract infection, rhinitis, cough increased. **Skin and Appendages**—rash, fungal dermatitis. **Special Senses**—abnormal vision. **Bipolar Mania. Body as a Whole**—headache, asthenia, accidental injury. **Cardiovascular**—hypertension. **Digestive**—nausea, diarrhea, dry mouth, vomiting, increased salivation, tongue edema. **Dysphagia. Musculoskeletal**—myalgia. **Nervous**—somnolence, extrapyramidal symptoms, dizziness, akathisia, anxiety, hyposthesia, speech disorder. **Respiratory**—pharyngitis, dyspnea. **Skin and Appendages**—fungal dermatitis. **Special Senses**—abnormal vision. **Dose Dependency:** An analysis for dose response in the schizophrenia trials revealed an apparent relation of adverse event to dose for the following: asthenia, postural hypotension, anorexia, dry mouth, increased salivation, arthralgia, anxiety, dizziness, dystonia, hypertension, somnolence, tremor, rhinitis, rash, and abnormal vision. **Extrapyramidal Symptoms (EPS):** The incidence of reported EPS for GEODON patients in the short-term, placebo-controlled schizophrenia trials was 14% vs 8% for placebo. Objectively collected data from those trials on the Simpson Angus Rating Scale and the Barnes Akathisia Scale did not generally show a difference between GEODON and placebo. **Dystonia:** Reported abnormal contractions of muscle groups may occur in susceptible individuals during first few days of treatment. Dystonia may occur at any dose level but with greater frequency and severity with high potency and at higher doses of first generation antipsychotic drugs. Elevated risk is observed in males and younger age groups. **Vital Sign Changes:** GEODON is associated with orthostatic hypotension (see PRECAUTIONS). **Weight Gain:** In short-term schizophrenia trials, the proportions of patients meeting a weight gain criterion of  $\geq 7\%$  of body weight were compared, revealing a statistically significantly greater incidence of weight gain for GEODON patients (10%) vs placebo patients (4%). A median weight gain of 0.5 kg was observed in GEODON patients vs 0.0 kg in placebo patients. Weight gain was reported as an adverse event in 0.4% of both GEODON and placebo patients. During long-term therapy with GEODON, a categorization of patients at baseline on the basis of body mass index (BMI) showed the greatest mean weight gain and the highest incidence of clinically significant weight gain ( $> 7\%$  of body weight) in patients with a low BMI ( $< 23$ ) compared to normal (23-27) or overweight ( $> 27$ ) patients. There was a mean weight gain of 1.4 kg for patients with a "low" baseline BMI, 0.0 kg for patients with a "normal" BMI, and a 1.3 kg mean weight loss for patients with a "high" BMI. **ECG Changes:** GEODON is associated with an increase in the QTc interval (see WARNINGS). In schizophrenia trials, GEODON was associated with a mean increase in heart rate of 1.4 beats per minute compared to a 0.2 beats per minute decrease among placebo patients. **Other Adverse Events Observed During the Premarketing Evaluation of GEODON:** Frequent adverse events are those occurring in at least 1/100 patients; infrequent adverse events are those occurring in 1/100 to 1/1000 patients; rare events are those occurring in fewer than 1/1000 patients. **Schizophrenia. Body as a Whole**—Frequent: abdominal pain, flu syndrome, fever, accidental fall, face edema, chills, photosensitivity reaction, flank pain, hyperthermia, motor vehicle accident. **Cardiovascular System**—Frequent: tachycardia, hypertension, postural hypotension; Infrequent: bradycardia, angina pectoris, atrial fibrillation; Rare: first-degree AV block, bundle-branch block, pleuritis, pulmonary embolism, cardiomyopathy, cerebral infarct, cerebrovascular accident, deep thrombophlebitis, myocarditis, thrombophlebitis. **Digestive System**—Frequent: anorexia, vomiting; Infrequent: rectal hemorrhage, dysphagia, tongue edema; Rare: gum hemorrhage, jaundice, fecal impaction, gallium glutamyl transpeptidase increased, hematemesis, cholestatic jaundice, hepatitis, hepatomegaly, leukoplakia of mouth, fatty liver deposit, melena. **Endocrine**—Rare: hypothyroidism, hyperthyroidism, thyroiditis. **Hemic and Lymphatic System**—Infrequent: anemia, ecchymosis, leukocytosis, leukopenia, eosinophilia, lymphadenopathy. **Rare:** thrombocytopenia, hypochromic anemia, lymphofoliosis, monocytosis, basophilia, lymphedema, polycythemia, thrombocytopenia. **Metabolic and Nutritional Disorders**—Infrequent: thirst, transaminase increased, peripheral edema, hyperglycemia, creatine phosphokinase increased, alkaline phosphatase increased, hypercholesterolemia, dehydration, lactic dehydrogenase increased, albuminuria, hypokalemia; Rare: BUN increased, creatinine increased, hyperperiferia, hypochlosterolemia, hyperkalemia, hypochlosterolemia, hypoglycemia, hyponatremia, hypoproteinemia, glucose tolerance decreased, gout, hyperchlosterolemia, hypernatremia, hypocalcemia, hypoglycemic reaction, hypomagnesemia, ketosis, respiratory alkalosis. **Musculoskeletal System**—Frequent: myalgia; Infrequent: brucellosis, pain; Rare: myopathy. **Nervous System**—Frequent: agitation, extrapyramidal symptoms, tremor, dystonia, hypertension, dyskinesia, hostility, twitching, paresthesia, confusion, vertigo, hypokinesia, hyperkinesia, abnormal gait, oculogyric crisis, hyposthesia, ataxia, amnesia, cogwheel rigidity, delirium, hypotonia, akinesia, dysarthria, withdrawal syndrome, buccoglossal syndrome, choreoathetosis, diplopia, incoordination, neuropraxia; Infrequent: paralysis; Rare: myoclonus, nystagmus, fasciculus, circumoral paresthesia, opisthotonus, reflexes increased, trismus. **Respiratory System**—Frequent: dyspnea; Infrequent: pneumonia, epistaxis; Rare: hemoptysis, varicella, sinusitis. **Skin and Appendages**—Infrequent: maculopurpuric rash, urticaria, alopecia, eczema, exfoliative dermatitis, contact dermatitis, benign/malignant basal, Special Senses—Frequent: fungal dermatitis; Infrequent: conjunctivitis, dry eyes, tinnitus, biphthoria, cataract, photophobia; Rare: eye hemorrhage, visual field defect, keratitis, keratoconjunctivitis. **Urogenital System**—Infrequent: impotence, abnormal ejaculation, amenorrhea, hematuria, menorrhagia, female lactation, polyuria, urinary retention, metrorrhagia, male sexual dysfunction, amorgasia, glycosuria; Rare: gynecomatia, vaginal hemorrhage, nocturia, oliguria, female sexual dysfunction, uterine hemorrhage. **Adverse Finding Observed in Trials of Intramuscular GEODON:** In these studies, the most commonly observed adverse events associated with the use of intramuscular GEODON (25%) and observed at a rate on intramuscular GEODON (in the higher dose groups) at least twice that of the lowest intramuscular GEODON group were headache (13%), nausea (12%), and somnolence (20%). **Adverse Events at an Incidence >1% in Short-Term Fixed-Dose Intramuscular Trials:** The following list enumerates the treatment-emergent adverse events that occurred in 2% of GEODON patients (in the higher dose groups) and at least twice that of the lowest intramuscular GEODON group. **Body as a Whole**—headache, injection site pain, asthenia, abdominal pain, flu syndrome, back pain. **Cardiovascular**—postural hypotension, hypertension, bradycardia, vasodilation. **Digestive**—nausea, rectal hemorrhage, diarrhea, vomiting, dyspepsia, anorexia, constipation, tooth disorder, dry mouth. **Nervous**—dizziness, anxiety, somnolence, incoherence, agitation, extrapyramidal symptoms, hypertension, cogwheel rigidity, paresthesia, personality disorder. **Respiratory**—speech disorder. **Respiratory**—rhinitis. **Skin and Appendages**—fungal dermatitis, sweating. **Urogenital**—dysmenorrhea, priapism. **DRUG ABUSE AND DEPENDENCE**—**Controlled Substance Class:** GEODON is not a controlled substance. **OVERDOSAGE**—In premarketing trials in over 5400 patients, accidental or intentional overdosage of GEODON was documented in 10 patients. All patients survived without sequelae. In the patient taking the largest confirmed amount (3240 mg), the only symptoms reported were minimal sedation, slurring of speech, and transitory hypertension (BP 200/95).



# Control acute agitation with **GEODON**<sup>®</sup> for *Injection* (ziprasidone mesylate)

In schizophrenia . . .

## Rapid control\* with low EPS<sup>1-4</sup>

- Low incidence of movement disorders<sup>1-4</sup>
- Smooth transition, with continued improvement, from IM to oral therapy<sup>3,4</sup>
- May be used concomitantly with benzodiazepines<sup>2,3,5</sup>

\* In 2 pivotal studies vs control, significance was achieved at the 2-hour primary end point (10 mg study) and at the 4-hour primary end point (20 mg study).

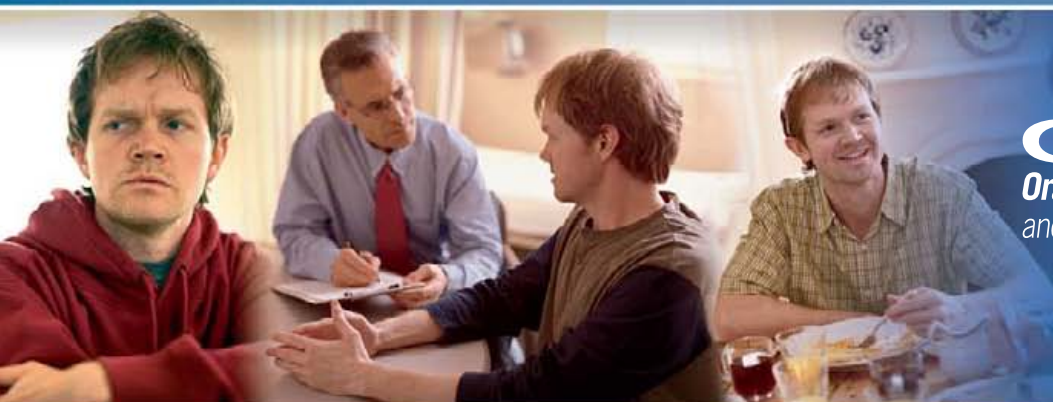

**GEODON**<sup>®</sup>  
Oral Capsules (ziprasidone HCl)  
and *Injection* (ziprasidone mesylate)

GEODON for Injection is indicated for the treatment of acute agitation in schizophrenic patients for whom treatment with GEODON is appropriate and who need intramuscular antipsychotic medication for rapid control of the agitation.

**Elderly patients with dementia-related psychosis treated with atypical antipsychotic drugs are at an increased risk of death compared to placebo. GEODON is not approved for the treatment of patients with dementia-related psychosis.**

**GEODON is contraindicated in patients with a known history of QT prolongation, recent acute myocardial infarction, or uncompensated heart failure, and should not be used with other QT-prolonging drugs. GEODON has a greater capacity to prolong the QT<sub>c</sub> interval than several antipsychotics. In some drugs, QT prolongation has been associated with torsade de pointes, a potentially fatal arrhythmia. In many cases this would lead to the conclusion that other drugs should be tried first.**

As with all antipsychotic medications, a rare and potentially fatal condition known as neuroleptic malignant syndrome (NMS) has been reported with GEODON. NMS can cause hyperpyrexia, muscle rigidity, diaphoresis, tachycardia, irregular pulse or blood pressure, cardiac dysrhythmia, and altered mental status. If signs and symptoms appear, immediate discontinuation, treatment, and monitoring are recommended.

Prescribing should be consistent with the need to minimize tardive dyskinesia (TD), a potentially irreversible dose- and duration-dependent syndrome. If signs and symptoms appear, discontinuation should be considered since TD may remit partially or completely.

Hyperglycemia-related adverse events, sometimes serious, have been reported in patients treated with atypical antipsychotics. There have been few reports of hyperglycemia or diabetes in patients treated with GEODON, and it is not known if GEODON is associated with these events. Patients treated with an atypical antipsychotic should be monitored for symptoms of hyperglycemia.

Precautions include the risk of rash, orthostatic hypotension, and seizures. In fixed-dose, pivotal studies, the most commonly observed adverse events associated with the use of GEODON for Injection (incidence  $\geq 5\%$ ) and observed at a rate in the higher GEODON dose groups (10 mg, 20 mg) of at least twice that of the lowest GEODON dose group (2 mg control) were somnolence (20%), headache (13%), and nausea (12%).

Please see brief summary of prescribing information on adjacent page.



**BRIEF SUMMARY.** See package insert for full prescribing information.

**Increased Mortality in Elderly Patients with Dementia-Related Psychosis:** Elderly patients with dementia-related psychosis treated with atypical antipsychotic drugs are at an increased risk of death compared to placebo. Analyses of seven placebo-controlled trials (modal duration of 10 weeks) in these patients revealed a risk of death in the drug-treated patients of between 1.6 to 1.7 times that seen in placebo-treated patients. Over the course of a typical 10 week controlled trial, the rate of death in drug-treated patients was about 4.5%, compared to a rate of about 2.6% in the placebo group. Although the causes of death were varied, most of the deaths appeared to be either cardiovascular (e.g., heart failure, sudden death) or infectious (e.g., pneumonia) in nature. GEODON (ziprasidone) is not approved for the treatment of patients with Dementia-Related Psychosis.

**INDICATIONS—**GEODON Capsules is indicated for the treatment of schizophrenia and acute manic or mixed episodes associated with bipolar disorder with or without psychotic features. GEODON<sup>®</sup> (ziprasidone mesylate) for injection is indicated for acute agitation in schizophrenic patients.

**CONTRAINDICATIONS—QT Prolongation:** Because of GEODON's dose-related prolongation of the QT interval and the known association of fatal arrhythmias with QT prolongation by some other drugs, GEODON is contraindicated in patients with a known history of QT prolongation (including congenital long QT syndrome), with recent acute myocardial infarction, or with uncompensated heart failure (see **WARNINGS**). Pharmacokinetic/pharmacodynamic studies between GEODON and other drugs that prolong the QT interval have not been performed. An additive effect of GEODON and other drugs that prolong the QT interval cannot be excluded. Therefore, GEODON should not be given with dofetilide, sotalol, quinidine, other Class Ia and III anti-arrhythmics, mesoridazine, thioridazine, chlorpromazine, droperidol, pimozide, sparfloxacin, gatifloxacin, moxifloxacin, halofantrine, mefloquine, pentamidine, arsenic trioxide, levomethadylacetate, dolasetron mesylate, procabron, or tacrolimus. GEODON is also contraindicated with drugs that have demonstrated QT prolongation as one of their pharmacodynamic effects and have this effect described in the full prescribing information as a contraindication or a boxed or bolded warning (see **WARNINGS**). GEODON is contraindicated in individuals with a known hypersensitivity to the product. **WARNINGS—Increased Mortality in Elderly Patients with Dementia-Related Psychosis:** Elderly patients with dementia-related psychosis treated with atypical antipsychotic drugs are at an increased risk of death compared to placebo. GEODON (ziprasidone) is not approved for the treatment of patients with dementia-related psychosis (see **Boxed Warning**). **QT Prolongation and Risk of Sudden Death:** GEODON use should be avoided in combination with other drugs that are known to prolong the QT interval. Additionally, clinicians should be alert to the identification of other drugs that have been consistently observed to prolong the QT interval. Such drugs should not be prescribed with GEODON. A study directly comparing the QT/QT<sub>c</sub>-prolonging effect of GEODON with several other drugs effective in the treatment of schizophrenia was conducted in patient volunteers. The mean increase in QT<sub>c</sub> from baseline for GEODON ranged from approximately 9 to 14 msec greater than for four of the comparator drugs (risperidone, olanzapine, quetiapine, and haloperidol), but was approximately 14 msec less than the prolongation observed for thioridazine. In this study, the effect of GEODON on QT<sub>c</sub> length was not augmented by the presence of a metabolic inhibitor (ketoconazole 200 mg bid). In placebo-controlled trials, GEODON increased the QT<sub>c</sub> interval compared to placebo by approximately 10 msec at the highest recommended daily dose of 160 mg. In clinical trials the electrocardiogram of 2/2988 (0.06%) GEODON patients and 1/440 (0.23%) placebo patients revealed QT<sub>c</sub> intervals exceeding the potentially clinically relevant threshold of 500 msec. In the GEODON patients, neither case suggested a role of GEODON. Some drugs that prolong the QT/QT<sub>c</sub> interval have been associated with the occurrence of torsade de pointes and with sudden unexplained death. The relationship of QT prolongation to torsade de pointes is clearest for larger increases (20 msec and greater) but it is possible that smaller QT/QT<sub>c</sub> prolongations may also increase risk, or increase it in susceptible individuals, such as those with hypokalemia, hypomagnesemia, or genetic predisposition. Although torsade de pointes has not been observed in association with the use of GEODON at recommended doses in premarketing studies, experience is too limited to rule out an increased risk. A study evaluating the QT/QT<sub>c</sub> prolonging effect of intramuscular GEODON, with intramuscular haloperidol as a control, was conducted in patient volunteers. In the trial, ECGs were obtained at the time of maximum plasma concentration following two injections of GEODON (20 mg then 30 mg) or haloperidol (7.5 mg then 10 mg) given four hours apart. Note that a 30 mg dose of intramuscular GEODON is 50% higher than the recommended therapeutic dose. The mean change in QT<sub>c</sub> from baseline was calculated for each drug using a sample-biased correction that removes the effect of heart rate on the QT interval. The mean increase in QT<sub>c</sub> from baseline for GEODON was 4.6 msec following the first injection and 12.8 msec following the second injection. The mean increase in QT<sub>c</sub> from baseline for haloperidol was 6.0 msec following the first injection and 14.7 msec following the second injection. In this study, no patient had a QT<sub>c</sub> interval exceeding 500 msec. As with other antipsychotic drugs and placebo, sudden unexplained deaths have been reported in patients taking GEODON at recommended doses. The premarketing experience for GEODON did not reveal an excess of mortality for GEODON compared to other antipsychotic drugs or placebo, but the extent of exposure was limited, especially for the drugs used as active controls and placebo. Nevertheless, GEODON's larger prolongation of QT<sub>c</sub> length compared to several other antipsychotic drugs raises the possibility that the risk of sudden death may be greater for GEODON than for other available drugs for treating schizophrenia. This possibility needs to be considered in deciding among alternative drug products. Certain circumstances may increase the risk of the occurrence of torsade de pointes and/or sudden death in association with the use of drugs that prolong the QT interval, including (1) bradycardia; (2) hypokalemia or hypomagnesemia; (3) concomitant use of other drugs that prolong the QT interval; and (4) presence of congenital prolongation of the QT interval. GEODON should also be avoided in patients with congenital long QT syndrome and in patients with a history of cardiac arrhythmias (see **CONTRAINDICATIONS**, and see **Drug Interactions** under **PRECAUTIONS**). It is recommended that patients being considered for GEODON treatment who are at risk for significant electrolyte disturbances, hypokalemia in particular, have baseline serum potassium and magnesium measurements. Hypokalemia (and/or hypomagnesemia) may increase the risk of QT prolongation and arrhythmia. Hypokalemia may result from diuretic therapy, diarrhea, and other causes. Patients with low serum potassium and/or magnesium should be repleted with those electrolytes before proceeding with treatment. It is essential to periodically monitor serum electrolytes in patients for whom diuretic therapy is introduced during GEODON treatment. Persistently prolonged QT<sub>c</sub> intervals may also increase the risk of further prolongation and arrhythmia, but it is not clear that routine screening ECG measures are effective in detecting such patients. Rather, GEODON should be avoided in patients with histories of significant cardiovascular illness, eg, QT prolongation, recent acute myocardial infarction, uncompensated heart failure, or cardiac arrhythmia. GEODON should be discontinued in patients who are found to have persistent QT<sub>c</sub> measurements >500 msec. **Neuroleptic Malignant Syndrome (NMS):** A potentially fatal syndrome complex sometimes referred to as Neuroleptic Malignant Syndrome (NMS) has been reported in association with administration of antipsychotic drugs. The management of NMS should include: (1) immediate discontinuation of antipsychotic drugs and other drugs not essential to concurrent therapy; (2) intensive symptomatic treatment and medical monitoring; and (3) treatment of any concomitant serious medical problems for which specific treatments are available. If a patient requires antipsychotic drug treatment after recovery from NMS, the potential reintroduction of drug therapy should be carefully considered. The patient should be carefully monitored, since recurrences of NMS have been reported. **Tardive Dyskinesia (TD):** A syndrome of potentially irreversible, involuntary, dyskinetic movements may develop in patients undergoing treatment with antipsychotic drugs. Although the prevalence of TD appears to be highest among the elderly, especially elderly women, it is impossible to rely upon prevalence estimates to predict, at the inception of antipsychotic treatment, which patients are likely to develop TD. Its signs and symptoms of TD appear in a patient on GEODON, drug discontinuation should be considered. **Hyperglycemia and Diabetes Mellitus:** Hyperglycemia-related adverse events, sometimes serious, have been reported in patients treated with atypical antipsychotics. There have been few reports of hyperglycemia or diabetes in patients treated with GEODON, and it is not known if GEODON is associated with these events. Patients treated with an atypical antipsychotic should be monitored for symptoms of hyperglycemia. **PRECAUTIONS—General:** Rash: In premarketing trials, about 5% of GEODON patients developed rash and/or urticaria, with discontinuation of treatment in about one-sixth of these cases. The occurrence of rash was dose related, although the finding might also be explained by longer exposure in higher-dose patients. Several patients with rash had signs and symptoms of associated systemic illness, eg, elevated WBCs. Most patients improved promptly upon treatment with antihistamines or steroids and/or upon discontinuation of GEODON, and all patients were reported to recover completely. Upon appearance of rash for which an alternative etiology cannot be identified, GEODON should be discontinued. **Orthostatic Hypotension:** GEODON may induce orthostatic hypotension associated with dizziness, tachycardia, and, in some patients, syncope, especially during the initial dose-titration period, probably reflecting its  $\alpha_1$ -adrenergic antagonist properties. Syncope was reported in 0.6% of GEODON patients. GEODON should be used with particular caution in patients with known cardiovascular disease (history of myocardial infarction or ischemic heart disease, heart failure or conduction abnormalities), cerebrovascular disease or conditions that would predispose patients to hypotension (dehydration, hypovolemia, and treatment with antihypertensive medications). **Seizures:** In clinical trials, seizures occurred in 0.4% of GEODON patients. There were confounding factors that may have contributed to seizures in many of these cases. As with other antipsychotic drugs, GEODON should be used cautiously in patients with a history of seizures or with conditions that potentially lower the seizure threshold, eg, Alzheimer's dementia. Conditions that lower the seizure threshold may be more prevalent in a population of 65 years or older. **Dysphagia:** Esophageal dysmotility and aspiration have been associated with antipsychotic drug use. Aspiration pneumonia is a common cause of morbidity and mortality in elderly patients, in particular those with advanced Alzheimer's dementia, and GEODON and other antipsychotic drugs should be used cautiously in patients at risk for aspiration pneumonia. (See also **Boxed Warning**, **WARNINGS: Increased Mortality in Elderly Patients with Dementia-Related Psychosis**). **Hyperprolactinemia:** As with other drugs that antagonize dopamine D<sub>2</sub> receptors, GEODON elevates prolactin levels in humans. Tissue culture experiments indicate that approximately one third of human breast cancers are prolactin dependent in vitro, a factor of potential importance if the prescription of these drugs is contemplated in a patient with previously detected breast cancer. Neither clinical studies nor epidemiologic studies conducted to date have shown an association between chronic administration of this class of drugs and tumorigenesis in humans; the available evidence is considered too limited to be conclusive at this time. **Potential for Cognitive and Motor Impairment:** Somnolence was a commonly reported adverse event in GEODON patients. In the 4- and 6-week placebo-controlled trials, somnolence was reported in 14% of GEODON patients vs 7% of placebo patients. Somnolence led to discontinuation in 0.3% of patients in short-term clinical trials. Since GEODON has the potential to impair judgment, thinking, or motor skills, patients should be cautioned about performing activities requiring mental alertness, such as operating a motor vehicle (including automobiles) or operating hazardous machinery until they are reasonably certain that GEODON therapy does not affect them adversely. **Priapism:** One case of priapism was reported in the premarketing database. **Body Temperature Regulation:** Although not reported with GEODON in premarketing trials, disruption of the body's ability to reduce core body temperature has been attributed to antipsychotic agents. **Suicide:** The possibility of a suicide attempt is inherent in psychotic illness and close supervision of high-risk patients should accompany drug therapy. GEODON prescriptions should be written for the smallest quantity of capsules consistent with good patient management to reduce overdose risk. **Use in Patients with Concomitant Illness:** Clinical experience with GEODON in patients with certain concomitant systemic illnesses is limited. GEODON has not been evaluated or used to any appreciable extent in patients with a recent history of myocardial infarction or unstable heart disease. Patients with these diagnoses were excluded from premarketing clinical studies. Because of the risk of QT<sub>c</sub> prolongation and orthostatic hypotension with GEODON, caution should be observed in cardiac patients (see **QT Prolongation and Risk of Sudden Death** in **WARNINGS** and **Orthostatic Hypotension** in **PRECAUTIONS**). **Information for Patients:** To ensure safe and effective use of GEODON, the

information and instructions in the *Patient Information Sections* should be discussed with patients. **Laboratory Tests:** Patients being considered for GEODON treatment who are at risk of significant electrolyte disturbances should have baseline serum potassium and magnesium measurements. Low serum potassium and magnesium should be repleted before treatment. Patients who are started on diuretics during GEODON therapy need periodic monitoring of serum potassium and magnesium. Discontinue GEODON in patients who are found to have persistent QT<sub>c</sub> measurements >500 msec (see **WARNINGS**). **Drug Interactions:** (1) GEODON should not be used with any drug that prolongs the QT interval. (2) Given the primary CNS effects of GEODON, caution should be used when it is taken in combination with other centrally acting drugs. (3) Because of its potential for inducing hypotension, GEODON may enhance the effects of certain antihypertensive agents. (4) GEODON may antagonize the effects of levodopa and dopamine agonists. **Effect of Other Drugs on GEODON:** **Carbamazepine:** 200 mg bid for 21 days, resulted in a decrease of approximately 35% in the AUC of GEODON. **Ketoconazole:** a potent inhibitor of CYP3A4, 400 mg qd for 5 days, increased the AUC and C<sub>max</sub> of GEODON by about 35%-40%. **Cimetidine:** 800 mg qd for 2 days, did not affect GEODON pharmacokinetics. Coadministration of 30 mL of *Maalox* did not affect GEODON pharmacokinetics. Population pharmacokinetic analysis of schizophrenic patients in controlled clinical trials has not revealed any clinically significant pharmacokinetic interactions with benzperone, propranolol, or lorazepam. **Effect of GEODON on Other Drugs:** In vitro studies revealed little potential for GEODON to interfere with the metabolism of drugs cleared primarily by CYP1A2, CYP2C9, CYP2C19, CYP2D6, and CYP3A4, and little potential for drug interactions with GEODON due to displacement. GEODON 40 mg bid administered concomitantly with *lithium* 450 mg bid for 7 days did not affect the steady-state level or renal clearance of lithium. GEODON 20 mg bid did not affect the pharmacokinetics of concomitantly administered oral *contraceptives*, ethinylestradiol (0.03 mg) and levonorgestrel (0.15 mg). Consistent with in vitro results, a study in normal healthy volunteers showed that GEODON did not alter the metabolism of *dextranethron*, a CYP2D6 model substrate, to its major metabolite, dextran. There was no statistically significant change in the urinary dextranethron/parent ratio. **Carcinogenesis, Mutagenesis, Impairment of Fertility:** Lifetime carcinogenicity studies were conducted with GEODON in Long Evans rats and CD-1 mice. In male mice, there was no increase in incidence of tumors relative to controls. In female mice there were dose-related increases in the incidences of pituitary gland adenoma and carcinoma, and mammary gland adenocarcinoma at all doses tested. Increases in serum prolactin were observed in a 1-2 month dietary study in female, but not male, mice. GEODON had no effect on serum prolactin in rats in a 5-week dietary study at the doses that were used in the carcinogenicity study. The relevance for human risk of the findings of prolactin-mediated endocrine tumors in rodents is unknown (see **Hyperprolactinemia**). **Mutagenesis:** There was a reproducible mutagenic response in the Ames assay in one strain of *S. typhimurium* in the absence of metabolic activation. Positive results were obtained in both the in vitro mammalian cell gene mutation assay and the in vitro chromosomal aberration assay in human lymphocytes. **Impairment of Fertility:** GEODON increased time to copulation in Sprague-Dawley rats in two fertility and early embryonic development studies at doses of 10 to 160 mg/kg/day (0.5 to 8 times the MRHD of 200 mg/day on a mg/m<sup>2</sup> basis). Fertility rate was reduced at 160 mg/kg/day (8 times the MRHD on a mg/m<sup>2</sup> basis). There was no effect on fertility at 40 mg/kg/day (2 times the MRHD on a mg/m<sup>2</sup> basis). The fertility of female rats was reduced. **Pregnancy—Pregnancy Category C:** There are no adequate and well-controlled studies in pregnant women. GEODON should be used during pregnancy only if the potential benefit justifies the potential risk to the fetus. **Labor and Delivery:** The effect of GEODON on labor and delivery in humans is unknown. **Nursing Mothers:** It is not known whether, and if so in what amount, GEODON or its metabolites are excreted in human milk. It is recommended that women receiving GEODON should not breast feed. **Pediatric Use:** The safety and effectiveness of GEODON in pediatric patients have not been established. **Geriatric Use:** Of the approximately 4500 patients treated with GEODON in clinical studies, 2,4% (109) were 65 years of age or over. In general, there was no indication of any different tolerability for GEODON or of reduced clearance of GEODON in the elderly compared to younger adults. Nevertheless, the presence of multiple factors that might increase the pharmacodynamic response to GEODON, or cause poorer tolerance or orthostasis, should lead to consideration of a lower starting dose, slower titration, and careful monitoring during the initial dosing period for some elderly patients. **ADVERSE REACTIONS—Adverse Findings Observed in Short-term, Placebo-Controlled Trials:** The following findings are based on the short-term placebo-controlled premarketing trials for schizophrenia (a pool of two 6-week, and two 4-week fixed-dose trials) and bipolar mania (a pool of two 3-week flexible-dose trials) in which GEODON was administered in doses ranging from 10 to 200 mg/day. **Adverse Events Associated with Discontinuation:** Schizophrenia: Approximately 4.1% (29/702) of GEODON-treated patients in short-term, placebo-controlled studies discontinued treatment due to an adverse event, compared with about 2.2% (6/273) on placebo. The most common event associated with dropout was rash, including 7 dropouts for rash among GEODON patients (1%) compared to no placebo patients (see **PRECAUTIONS**). Bipolar Mania: Approximately 6.5% (18/279) of GEODON-treated patients in short-term, placebo-controlled studies discontinued treatment due to an adverse event, compared with about 3.7% (5/136) on placebo. The most common events associated with dropout in the GEODON-treated patients were akathisia, anxiety, depression, dizziness, dystonia, rash and vomiting, with 2 dropouts for each of these events among GEODON patients (1%) compared to one placebo patient each for dystonia and rash (1%) and no placebo patients for the remaining adverse events. **Adverse Events at an Incidence >5% and at Least Twice the Rate of Placebo:** The most commonly observed adverse events associated with GEODON in schizophrenia trials were somnolence (14%) and respiratory tract infection (8%). The most commonly observed adverse events associated with the use of GEODON in bipolar mania trials were somnolence (31%), extrapyramidal symptoms (31%), dizziness (16%), akathisia (10%), abnormal vision (6%), asthenia (6%), and vomiting (5%). The following list enumerates the treatment-emergent adverse events that occurred during acute therapy, including only those events that occurred in 2% of GEODON patients and at a greater incidence than in placebo. Schizophrenia: **Body as a Whole—**asthenia, accidental injury, chest pain, **Cardiovascular—**tachycardia, **Digestive—**nausea, constipation, dyspepsia, diarrhea, dry mouth, anorexia, **Nervous—**extrapyramidal symptoms, somnolence, akathisia, dizziness, **Respiratory—**respiratory tract infection, rhinitis, cough increased, **Skin and Appendages—**rash, fungal dermatitis, **Special Senses—**abnormal vision, **Bipolar Mania: Body as a Whole—**headache, asthenia, accidental injury, **Cardiovascular—**hypertension, **Digestive—**nausea, diarrhea, dry mouth, vomiting, increased salivation, tongue edema, dysphagia, **Musculoskeletal—**myalgia, **Nervous—**somnolence, extrapyramidal symptoms, dizziness, akathisia, anxiety, hyposthesia, speech disorder, **Respiratory—**pharyngitis, dyspnea, **Skin and Appendages—**nausea, diarrhea, dry mouth, vomiting, increased salivation, tongue edema, dysphagia, **Cardiovascular—**hypertension, **Digestive—**nausea, diarrhea, dry mouth, vomiting, increased salivation, tongue edema, dysphagia, **Musculoskeletal—**myalgia, **Nervous—**somnolence, extrapyramidal symptoms, dizziness, akathisia, anxiety, hyposthesia, speech disorder, **Respiratory—**pharyngitis, dyspnea, **Skin and Appendages—**nausea, diarrhea, dry mouth, vomiting, increased salivation, tongue edema, dysphagia, **Cardiovascular—**hypertension, **Digestive—**nausea, diarrhea, dry mouth, vomiting, increased salivation, tongue edema, dysphagia, **Musculoskeletal—**myalgia, **Nervous—**somnolence, extrapyramidal symptoms, dizziness, akathisia, anxiety, hyposthesia, speech disorder, **Respiratory—**pharyngitis, dyspnea, **Skin and Appendages—**nausea, diarrhea, dry mouth, vomiting, increased salivation, tongue edema, dysphagia, **Cardiovascular—**hypertension, **Digestive—**nausea, diarrhea, dry mouth, vomiting, increased salivation, tongue edema, dysphagia, **Musculoskeletal—**myalgia, **Nervous—**somnolence, extrapyramidal symptoms, dizziness, akathisia, anxiety, hyposthesia, speech disorder, **Respiratory—**pharyngitis, dyspnea, **Skin and Appendages—**nausea, diarrhea, dry mouth, vomiting, increased salivation, tongue edema, dysphagia, **Cardiovascular—**hypertension, **Digestive—**nausea, diarrhea, dry mouth, vomiting, increased salivation, tongue edema, dysphagia, **Musculoskeletal—**myalgia, **Nervous—**somnolence, extrapyramidal symptoms, dizziness, akathisia, anxiety, hyposthesia, speech disorder, **Respiratory—**pharyngitis, dyspnea, **Skin and Appendages—**nausea, diarrhea, dry mouth, vomiting, increased salivation, tongue edema, dysphagia, **Cardiovascular—**hypertension, **Digestive—**nausea, diarrhea, dry mouth, vomiting, increased salivation, tongue edema, dysphagia, **Musculoskeletal—**myalgia, **Nervous—**somnolence, extrapyramidal symptoms, dizziness, akathisia, anxiety, hyposthesia, speech disorder, **Respiratory—**pharyngitis, dyspnea, **Skin and Appendages—**nausea, diarrhea, dry mouth, vomiting, increased salivation, tongue edema, dysphagia, **Cardiovascular—**hypertension, **Digestive—**nausea, diarrhea, dry mouth, vomiting, increased salivation, tongue edema, dysphagia, **Musculoskeletal—**myalgia, **Nervous—**somnolence, extrapyramidal symptoms, dizziness, akathisia, anxiety, hyposthesia, speech disorder, **Respiratory—**pharyngitis, dyspnea, **Skin and Appendages—**nausea, diarrhea, dry mouth, vomiting, increased salivation, tongue edema, dysphagia, **Cardiovascular—**hypertension, **Digestive—**nausea, diarrhea, dry mouth, vomiting, increased salivation, tongue edema, dysphagia, **Musculoskeletal—**myalgia, **Nervous—**somnolence, extrapyramidal symptoms, dizziness, akathisia, anxiety, hyposthesia, speech disorder, **Respiratory—**pharyngitis, dyspnea, **Skin and Appendages—**nausea, diarrhea, dry mouth, vomiting, increased salivation, tongue edema, dysphagia, **Cardiovascular—**hypertension, **Digestive—**nausea, diarrhea, dry mouth, vomiting, increased salivation, tongue edema, dysphagia, **Musculoskeletal—**myalgia, **Nervous—**somnolence, extrapyramidal symptoms, dizziness, akathisia, anxiety, hyposthesia, speech disorder, **Respiratory—**pharyngitis, dyspnea, **Skin and Appendages—**nausea, diarrhea, dry mouth, vomiting, increased salivation, tongue edema, dysphagia, **Cardiovascular—**hypertension, **Digestive—**nausea, diarrhea, dry mouth, vomiting, increased salivation, tongue edema, dysphagia, **Musculoskeletal—**myalgia, **Nervous—**somnolence, extrapyramidal symptoms, dizziness, akathisia, anxiety, hyposthesia, speech disorder, **Respiratory—**pharyngitis, dyspnea, **Skin and Appendages—**nausea, diarrhea, dry mouth, vomiting, increased salivation, tongue edema, dysphagia, **Cardiovascular—**hypertension, **Digestive—**nausea, diarrhea, dry mouth, vomiting, increased salivation, tongue edema, dysphagia, **Musculoskeletal—**myalgia, **Nervous—**somnolence, extrapyramidal symptoms, dizziness, akathisia, anxiety, hyposthesia, speech disorder, **Respiratory—**pharyngitis, dyspnea, **Skin and Appendages—**nausea, diarrhea, dry mouth, vomiting, increased salivation, tongue edema, dysphagia, **Cardiovascular—**hypertension, **Digestive—**nausea, diarrhea, dry mouth, vomiting, increased salivation, tongue edema, dysphagia, **Musculoskeletal—**myalgia, **Nervous—**somnolence, extrapyramidal symptoms, dizziness, akathisia, anxiety, hyposthesia, speech disorder, **Respiratory—**pharyngitis, dyspnea, **Skin and Appendages—**nausea, diarrhea, dry mouth, vomiting, increased salivation, tongue edema, dysphagia, **Cardiovascular—**hypertension, **Digestive—**nausea, diarrhea, dry mouth, vomiting, increased salivation, tongue edema, dysphagia, **Musculoskeletal—**myalgia, **Nervous—**somnolence, extrapyramidal symptoms, dizziness, akathisia, anxiety, hyposthesia, speech disorder, **Respiratory—**pharyngitis, dyspnea, **Skin and Appendages—**nausea, diarrhea, dry mouth, vomiting, increased salivation, tongue edema, dysphagia, **Cardiovascular—**hypertension, **Digestive—**nausea, diarrhea, dry mouth, vomiting, increased salivation, tongue edema, dysphagia, **Musculoskeletal—**myalgia, **Nervous—**somnolence, extrapyramidal symptoms, dizziness, akathisia, anxiety, hyposthesia, speech disorder, **Respiratory—**pharyngitis, dyspnea, **Skin and Appendages—**nausea, diarrhea, dry mouth, vomiting, increased salivation, tongue edema, dysphagia, **Cardiovascular—**hypertension, **Digestive—**nausea, diarrhea, dry mouth, vomiting, increased salivation, tongue edema, dysphagia, **Musculoskeletal—**myalgia, **Nervous—**somnolence, extrapyramidal symptoms, dizziness, akathisia, anxiety, hyposthesia, speech disorder, **Respiratory—**pharyngitis, dyspnea, **Skin and Appendages—**nausea, diarrhea, dry mouth, vomiting, increased salivation, tongue edema, dysphagia, **Cardiovascular—**hypertension, **Digestive—**nausea, diarrhea, dry mouth, vomiting, increased salivation, tongue edema, dysphagia, **Musculoskeletal—**myalgia, **Nervous—**somnolence, extrapyramidal symptoms, dizziness, akathisia, anxiety, hyposthesia, speech disorder, **Respiratory—**pharyngitis, dyspnea, **Skin and Appendages—**nausea, diarrhea, dry mouth, vomiting, increased salivation, tongue edema, dysphagia, **Cardiovascular—**hypertension, **Digestive—**nausea, diarrhea, dry mouth, vomiting, increased salivation, tongue edema, dysphagia, **Musculoskeletal—**myalgia, **Nervous—**somnolence, extrapyramidal symptoms, dizziness, akathisia, anxiety, hyposthesia, speech disorder, **Respiratory—**pharyngitis, dyspnea, **Skin and Appendages—**nausea, diarrhea, dry mouth, vomiting, increased salivation, tongue edema, dysphagia, **Cardiovascular—**hypertension, **Digestive—**nausea, diarrhea, dry mouth, vomiting, increased salivation, tongue edema, dysphagia, **Musculoskeletal—**myalgia, **Nervous—**somnolence, extrapyramidal symptoms, dizziness, akathisia, anxiety, hyposthesia, speech disorder, **Respiratory—**pharyngitis, dyspnea, **Skin and Appendages—**nausea, diarrhea, dry mouth, vomiting, increased salivation, tongue edema, dysphagia, **Cardiovascular—**hypertension, **Digestive—**nausea, diarrhea, dry mouth, vomiting, increased salivation, tongue edema, dysphagia, **Musculoskeletal—**myalgia, **Nervous—**somnolence, extrapyramidal symptoms, dizziness, akathisia, anxiety, hyposthesia, speech disorder, **Respiratory—**pharyngitis, dyspnea, **Skin and Appendages—**nausea, diarrhea, dry mouth, vomiting, increased salivation, tongue edema, dysphagia, **Cardiovascular—**hypertension, **Digestive—**nausea, diarrhea, dry mouth, vomiting, increased salivation, tongue edema, dysphagia, **Musculoskeletal—**myalgia, **Nervous—**somnolence, extrapyramidal symptoms, dizziness, akathisia, anxiety, hyposthesia, speech disorder, **Respiratory—**pharyngitis, dyspnea, **Skin and Appendages—**nausea, diarrhea, dry mouth, vomiting, increased salivation, tongue edema, dysphagia, **Cardiovascular—**hypertension, **Digestive—**nausea, diarrhea, dry mouth, vomiting, increased salivation, tongue edema, dysphagia, **Musculoskeletal—**myalgia, **Nervous—**somnolence, extrapyramidal symptoms, dizziness, akathisia, anxiety, hyposthesia, speech disorder, **Respiratory—**pharyngitis, dyspnea, **Skin and Appendages—**nausea, diarrhea, dry mouth, vomiting, increased salivation, tongue edema, dysphagia, **Cardiovascular—**hypertension, **Digestive—**nausea, diarrhea, dry mouth, vomiting, increased salivation, tongue edema, dysphagia, **Musculoskeletal—**myalgia, **Nervous—**somnolence, extrapyramidal symptoms, dizziness, akathisia, anxiety, hyposthesia, speech disorder, **Respiratory—**pharyngitis, dyspnea, **Skin and Appendages—**nausea, diarrhea, dry mouth, vomiting, increased salivation, tongue edema, dysphagia, **Cardiovascular—**hypertension, **Digestive—**nausea, diarrhea, dry mouth, vomiting, increased salivation, tongue edema, dysphagia, **Musculoskeletal—**myalgia, **Nervous—**somnolence, extrapyramidal symptoms, dizziness, akathisia, anxiety, hyposthesia, speech disorder, **Respiratory—**pharyngitis, dyspnea, **Skin and Appendages—**nausea, diarrhea, dry mouth, vomiting, increased salivation, tongue edema, dysphagia, **Cardiovascular—**hypertension, **Digestive—**nausea, diarrhea, dry mouth, vomiting, increased salivation, tongue edema, dysphagia, **Musculoskeletal—**myalgia, **Nervous—**somnolence, extrapyramidal symptoms, dizziness, akathisia, anxiety, hyposthesia, speech disorder, **Respiratory—**pharyngitis, dyspnea, **Skin and Appendages—**nausea, diarrhea, dry mouth, vomiting, increased salivation, tongue edema, dysphagia, **Cardiovascular—**hypertension, **Digestive—**nausea, diarrhea, dry mouth, vomiting, increased salivation, tongue edema, dysphagia, **Musculoskeletal—**myalgia, **Nervous—**somnolence, extrapyramidal symptoms, dizziness, akathisia, anxiety, hyposthesia, speech disorder, **Respiratory—**pharyngitis, dyspnea, **Skin and Appendages—**nausea, diarrhea, dry mouth, vomiting, increased salivation, tongue edema, dysphagia, **Cardiovascular—**hypertension, **Digestive—**nausea, diarrhea, dry mouth, vomiting, increased salivation, tongue edema, dysphagia, **Musculoskeletal—**myalgia, **Nervous—**somnolence, extrapyramidal symptoms, dizziness, akathisia, anxiety, hyposthesia, speech disorder, **Respiratory—**pharyngitis, dyspnea, **Skin and Appendages—**nausea, diarrhea, dry mouth, vomiting, increased salivation, tongue edema, dysphagia, **Cardiovascular—**hypertension, **Digestive—**nausea, diarrhea, dry mouth, vomiting, increased salivation, tongue edema, dysphagia, **Musculoskeletal—**myalgia, **Nervous—**somnolence, extrapyramidal symptoms, dizziness, akathisia, anxiety, hyposthesia, speech disorder, **Respiratory—**pharyngitis, dyspnea, **Skin and Appendages—**nausea, diarrhea, dry mouth, vomiting, increased salivation, tongue edema, dysphagia, **Cardiovascular—**hypertension, **Digestive—**nausea, diarrhea, dry mouth, vomiting, increased salivation, tongue edema, dysphagia, **Musculoskeletal—**myalgia, **Nervous—**somnolence, extrapyramidal symptoms, dizziness, akathisia, anxiety, hyposthesia, speech disorder, **Respiratory—**pharyngitis, dyspnea, **Skin and Appendages—**nausea, diarrhea, dry mouth, vomiting, increased salivation, tongue edema, dysphagia, **Cardiovascular—**hypertension, **Digestive—**nausea, diarrhea, dry mouth, vomiting, increased salivation, tongue edema, dysphagia, **Musculoskeletal—**myalgia, **Nervous—**somnolence, extrapyramidal symptoms, dizziness, akathisia, anxiety, hyposthesia, speech disorder, **Respiratory—**pharyngitis, dyspnea, **Skin and Appendages—**nausea, diarrhea, dry mouth, vomiting, increased salivation, tongue edema, dysphagia, **Cardiovascular—**hypertension, **Digestive—**nausea, diarrhea, dry mouth, vomiting, increased salivation, tongue edema, dysphagia, **Musculoskeletal—**myalgia, **Nervous—**somnolence, extrapyramidal symptoms, dizziness, akathisia, anxiety, hyposthesia, speech disorder, **Respiratory—**pharyngitis, dyspnea, **Skin and Appendages—**nausea, diarrhea, dry mouth, vomiting, increased salivation, tongue edema, dysphagia, **Cardiovascular—**hypertension, **Digestive—**nausea, diarrhea, dry mouth, vomiting, increased salivation, tongue edema, dysphagia, **Musculoskeletal—**myalgia, **Nervous—**somnolence, extrapyramidal symptoms, dizziness, akathisia, anxiety, hyposthesia, speech disorder, **Respiratory—**pharyngitis, dyspnea, **Skin and Appendages—**nausea, diarrhea, dry mouth, vomiting, increased salivation, tongue edema, dysphagia, **Cardiovascular—**hypertension, **Digestive—**nausea, diarrhea, dry mouth, vomiting, increased salivation, tongue edema, dysphagia, **Musculoskeletal—**myalgia, **Nervous—**somnolence, extrapyramidal symptoms, dizziness, akathisia, anxiety, hyposthesia, speech disorder, **Respiratory—**pharyngitis, dyspnea, **Skin and Appendages—**nausea, diarrhea, dry mouth, vomiting, increased salivation, tongue edema, dysphagia, **Cardiovascular—**hypertension, **Digestive—**nausea, diarrhea, dry mouth, vomiting, increased salivation, tongue edema, dysphagia, **Musculoskeletal—**myalgia, **Nervous—**somnolence, extrapyramidal symptoms, dizziness, akathisia, anxiety, hyposthesia, speech disorder, **Respiratory—**pharyngitis, dyspnea, **Skin and Appendages—**nausea, diarrhea, dry mouth, vomiting, increased salivation, tongue edema, dysphagia, **Cardiovascular—**hypertension, **Digestive—**nausea, diarrhea, dry mouth, vomiting, increased salivation, tongue edema, dysphagia, **Musculoskeletal—**myalgia, **Nervous—**somnolence, extrapyramidal symptoms, dizziness, akathisia, anxiety, hyposthesia, speech disorder, **Respiratory—**pharyngitis, dyspnea, **Skin and Appendages—**nausea, diarrhea, dry mouth, vomiting, increased salivation, tongue edema, dysphagia, **Cardiovascular—**hypertension, **Digestive—**nausea, diarrhea, dry mouth, vomiting, increased salivation, tongue edema, dysphagia, **Musculoskeletal—**myalgia, **Nervous—**somnolence, extrapyramidal symptoms, dizziness, akathisia, anxiety, hyposthesia, speech disorder, **Respiratory—**pharyngitis, dyspnea, **Skin and Appendages—**nausea, diarrhea, dry mouth, vomiting, increased salivation, tongue edema, dysphagia, **Cardiovascular—**hypertension, **Digestive—**nausea, diarrhea, dry mouth, vomiting, increased salivation, tongue edema, dysphagia, **Musculoskeletal—**myalgia, **Nervous—**somnolence, extrapyramidal symptoms, dizziness, akathisia, anxiety, hyposthesia, speech disorder, **Respiratory—**pharyngitis, dyspnea, **Skin and Appendages—**nausea, diarrhea, dry mouth, vomiting, increased salivation, tongue edema, dysphagia, **Cardiovascular—**hypertension, **Digestive—**nausea, diarrhea, dry mouth, vomiting, increased salivation, tongue edema, dysphagia, **Musculoskeletal—**myalgia, **Nervous—**somnolence, extrapyramidal symptoms, dizziness, akathisia, anxiety, hyposthesia, speech disorder, **Respiratory—**pharyngitis, dyspnea, **Skin and Appendages—**nausea, diarrhea, dry mouth, vomiting, increased salivation, tongue edema, dysphagia, **Cardiovascular—**hypertension, **Digestive—**nausea, diarrhea, dry mouth, vomiting, increased salivation, tongue edema, dysphagia, **Musculoskeletal—**myalgia, **Nervous—**somnolence, extrapyramidal symptoms, dizziness, akathisia, anxiety, hyposthesia, speech disorder, **Respiratory—**pharyngitis, dyspnea, **Skin and Appendages—**nausea, diarrhea, dry mouth, vomiting, increased salivation, tongue edema, dysphagia, **Cardiovascular—**hypertension, **Digestive—**nausea, diarrhea, dry mouth, vomiting, increased salivation, tongue edema, dysphagia, **Musculoskeletal—**myalgia, **Nervous—**somnolence, extrapyramidal symptoms, dizziness, akathisia, anxiety, hyposthesia, speech disorder, **Respiratory—**pharyngitis, dyspnea, **Skin and Appendages—**nausea, diarrhea, dry mouth, vomiting, increased salivation, tongue edema, dysphagia, **Cardiovascular—**hypertension, **Digestive—**nausea, diarrhea, dry mouth, vomiting, increased salivation, tongue edema, dysphagia, **Musculoskeletal—**myalgia, **Nervous—**somnolence, extrapyramidal symptoms, dizziness, akathisia, anxiety, hyposthesia, speech disorder, **Respiratory—**pharyngitis, dyspnea, **Skin and Appendages—**nausea, diarrhea, dry mouth, vomiting, increased salivation, tongue edema, dysphagia, **Cardiovascular—**hypertension, **Digestive—**nausea, diarrhea, dry mouth, vomiting, increased salivation, tongue edema, dysphagia, **Musculoskeletal—**myalgia, **Nervous—**somnolence, extrapyramidal symptoms, dizziness, akathisia, anxiety, hyposthesia, speech disorder, **Respiratory—**pharyngitis, dyspnea, **Skin and Appendages—**nausea, diarrhea, dry mouth, vomiting, increased salivation, tongue edema, dysphagia, **Cardiovascular—**hypertension, **Digestive—**nausea, diarrhea, dry mouth, vomiting, increased salivation, tongue edema, dysphagia, **Musculoskeletal—**myalgia, **Nervous—**somnolence, extrapyramidal symptoms, dizziness, akathisia, anxiety, hyposthesia, speech disorder, **Respiratory—**pharyngitis, dyspnea, **Skin and Appendages—**nausea, diarrhea, dry mouth, vomiting, increased salivation, tongue edema, dysphagia, **Cardiovascular—**hypertension, **Digestive—**nausea, diarrhea, dry mouth, vomiting, increased salivation, tongue edema, dysphagia, **Musculoskeletal—**myalgia, **Nervous—**somnolence, extrapyramidal symptoms, dizziness, akathisia, anxiety, hyposthesia, speech disorder, **Respiratory—**pharyngitis, dyspnea, **Skin and Appendages—**nausea, diarrhea, dry mouth, vomiting, increased salivation, tongue edema, dysphagia, **Cardiovascular—**hypertension, **Digestive—**nausea, diarrhea, dry mouth, vomiting, increased salivation, tongue edema, dysphagia, **Musculoskeletal—**myalgia, **Nervous—**somnolence, extrapyramidal symptoms, dizziness, akathisia, anxiety, hyposthesia, speech disorder, **Respiratory—**pharyngitis, dyspnea, **Skin and Appendages—**nausea, diarrhea, dry mouth, vomiting, increased salivation, tongue edema, dysphagia, **Cardiovascular—**hypertension, **Digestive—**nausea, diarrhea, dry mouth, vomiting, increased salivation, tongue edema, dysphagia, **Musculoskeletal—**myalgia, **Nervous—**somnolence, extrapyramidal symptoms, dizziness, akathisia, anxiety, hyposthesia, speech disorder, **Respiratory—**pharyngitis, dyspnea, <



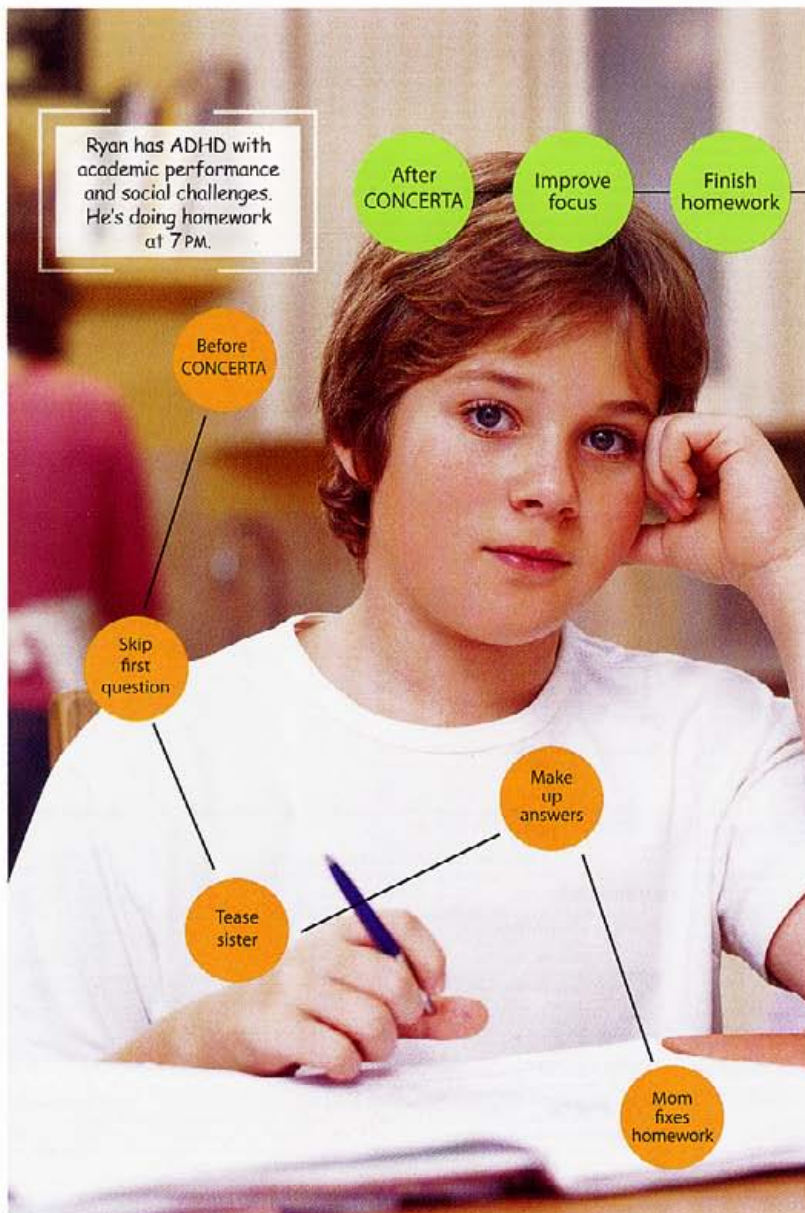

Ryan has ADHD with academic performance and social challenges. He's doing homework at 7 PM.

After CONCERTA

Improve focus

Finish homework

Proudly show Mom

Before CONCERTA

Skip first question

Tease sister

Make up answers

Mom fixes homework

## HELP RYAN GET THERE WITH CONCERTA

- **Improved academic performance through 7 PM**, as demonstrated by improved math test performance in a laboratory school setting<sup>1</sup>
- **Improved social interactions** at school and at home with one morning dose<sup>1,2</sup>
- **Smooth delivery** and consistent improvement of ADHD symptoms through **12 hours**<sup>1,3</sup>
- Proven low rates of side effects and **7 years** of clinical experience
- **The #1** prescribed ADHD product for children and adolescents with ADHD<sup>4</sup>

Representative patient portrayal

START HERE ONCE-DAILY GET THERE

**CONCERTA**<sup>®</sup>  
methylphenidate HCl

extended-release tablets 18 mg, 27 mg, 36 mg, 54 mg

For more information, call 1-888-440-7903 or visit [www.concerta360.com](http://www.concerta360.com)

### IMPORTANT SAFETY INFORMATION

CONCERTA is indicated for the treatment of attention deficit hyperactivity disorder (ADHD) in children and adolescents. CONCERTA should not be taken by patients with: significant anxiety, tension, or agitation; allergies to methylphenidate or other ingredients in CONCERTA; glaucoma; Tourette's syndrome, tics, or family history of Tourette's syndrome; current/recent use of monoamine oxidase inhibitors (MAOIs). Children under 6 years of age should not take CONCERTA. Abuse of methylphenidate may lead to dependence.

Use with caution in patients with psychosis, bipolar disorder, history of seizures/EEG abnormalities, and hypertension. CONCERTA should not be used in patients with pre-existing severe gastrointestinal narrowing, known structural cardiac abnormalities, or other serious heart problems. Stimulants may cause new psychotic or manic symptoms. Aggressive behavior/hostility should be monitored in patients beginning treatment.

The most common adverse events reported in children receiving up to 54 mg were headache, upper respiratory tract infection, and abdominal pain. The most common adverse events reported in adolescents receiving up to 72 mg were headache, accidental injury, and insomnia.

References: 1. Pelham WE, Gnagy EM, Burrows-Maclean L, et al. Once-a-day Concerta methylphenidate versus three-times-daily methylphenidate in laboratory and natural settings. *Pediatrics*. 2001;107(6). Available at: <http://www.pediatrics.org/cgi/content/full/107/6/e105>. 2. Wilens TE, McBurnett K, Bukstein O, et al. Multisite controlled study of OROS<sup>®</sup> methylphenidate in the treatment of adolescents with attention-deficit/hyperactivity disorder. *Arch Pediatr Adolesc Med*. 2006;160:87-90. 3. Swanson J, Gupta S, Lam A, et al. Development of a new once-a-day formulation of methylphenidate for the treatment of attention-deficit/hyperactivity disorder: proof-of-concept and proof-of-product studies. *Arch Gen Psychiatry*. 2003;60:204-211. 4. IMS Health, National Prescription Audit, March 2007.

Please see brief summary of full Prescribing Information on next page.

CONCERTA and OROS are registered trademarks of ALZA Corporation.

© Ortho-McNeil-Janssen Pharmaceuticals, Inc. 2008

April 2008

60CON08440



# CONCERTA® (methylphenidate HCl) Extended-release Tablets

## Brief Summary

Before prescribing CONCERTA®, please see full prescribing information.

## INDICATION AND USAGE

**Attention Deficit Hyperactivity Disorder (ADHD):** CONCERTA® is indicated for the treatment of Attention Deficit Hyperactivity Disorder (ADHD). **Need for Comprehensive Treatment Program:** CONCERTA® is indicated as an integral part of a total treatment program for ADHD that may include other measures (psychological, educational, social) for patients with this syndrome. Drug treatment may not be indicated for all patients with this syndrome. Stimulants are not intended for use in patients who exhibit symptoms secondary to environmental factors and/or other primary psychiatric disorders, including psychosis. Appropriate educational placement is essential and psychological intervention is often helpful. When minimal measures alone are insufficient, the decision to prescribe stimulant medication will depend upon the physician's assessment of the chronicity and severity of the patient's symptoms. **Long-Term Use:** The effectiveness of CONCERTA® for long-term use, for more than 4 weeks, has not been systematically evaluated in controlled trials. Therefore, the physician who prescribes CONCERTA® for extended periods should periodically re-evaluate the long-term usefulness of the drug for the individual patient (see **DOSE AND ADMINISTRATION** in full prescribing information).

## CONTRAINDICATIONS

**Agitation:** CONCERTA® is contraindicated in patients with marked anxiety, tension, and agitation, since the drug may aggravate these symptoms. **Hypersensitivity to Methylphenidate:** CONCERTA® is contraindicated in patients known to be hypersensitive to methylphenidate or other components of the product. **Glaucoma:** CONCERTA® is contraindicated in patients with glaucoma. **Tics:** CONCERTA® is contraindicated in patients with motor tics or with a family history or diagnosis of Tourette's syndrome (see **ADVERSE REACTIONS**). **Monooamine Oxidase Inhibitors:** CONCERTA® is contraindicated during treatment with monoamine oxidase (MAO) inhibitors, and also within a minimum of 14 days following discontinuation of a MAO-inhibitor (hypertensive crisis may result) (see **PRECAUTIONS, Drug Interactions**).

## WARNINGS

**Serious Cardiovascular Events: Sudden Death and Pre-existing Structural Cardiac Abnormalities or Other Serious Heart Problems:** Children and Adolescents: Sudden death has been reported in association with CNS stimulant treatment at usual doses in children and adolescents with structural cardiac abnormalities or other serious heart problems. Although some serious heart problems alone carry an increased risk of sudden death, stimulant products generally should not be used in children or adolescents with known serious structural cardiac abnormalities, cardiomyopathy, serious heart rhythm abnormalities, or other serious cardiac problems that may place them at increased vulnerability to the sympathomimetic effects of a stimulant drug. Adults: Sudden death, stroke, and myocardial infarction have been reported in adults receiving stimulant drugs at usual doses. Although the role of stimulants in these adult cases is also unknown, adults have a greater likelihood than children of having serious structural cardiac abnormalities, cardiomyopathy, serious heart rhythm abnormalities, coronary artery disease, or other serious cardiac problems. Adults with such abnormalities should also generally not be treated with stimulant drugs. **Hypertension and Other Cardiovascular Conditions:** Stimulant medications cause a modest increase in average blood pressure (about 2-4 mmHg) and average heart rate (about 3-6 bpm) (see **ADVERSE REACTIONS-Hypertension**), and individuals may have larger increases. While the mean changes alone would not be expected to have short-term consequences, all patients should be monitored for larger changes in heart rate and blood pressure. Caution is indicated in treating patients whose underlying medical conditions might be compromised by increases in blood pressure or heart rate, e.g., those with pre-existing hypertension, heart failure, recent myocardial infarction, or ventricular arrhythmia. **Assessing Cardiovascular Status in Patients Being Treated With Stimulant Medications:** Children, adolescents, or adults who are being considered for treatment with stimulant medications, should have a careful history (including assessment for a family history of sudden death or ventricular arrhythmia) and physical exam to assess for the presence of cardiac disease, and should receive further cardiac evaluation if findings suggest such disease (e.g., electrocardiogram and echocardiogram). Patients who develop symptoms such as exertional chest pain, unexplained syncope, or other symptoms suggestive of cardiac disease during stimulant treatment should undergo a prompt cardiac evaluation.

## PSYCHIATRIC ADVERSE EVENTS

**Pre-existing Psychosis:** Administration of stimulants may exacerbate symptoms of behavior disturbance and thought disorder in patients with a pre-existing psychotic disorder. **Bipolar Illness:** Particular care should be taken in using stimulants to treat ADHD in patients with comorbid bipolar disorder because of concern for possible induction of a mixed/manic episode in such patients. Prior to initiating treatment with a stimulant, patients with comorbid depressive symptoms should be adequately screened to determine if they are at risk for bipolar disorder; such screening should include a detailed psychiatric history, including a family history of suicidality, bipolar disorder, and depression. Emergence of New Psychotic or Manic Symptoms: Treatment emergent psychotic or manic symptoms, e.g., hallucinations, delusional thinking, or mania in children and adolescents without a prior history of psychotic illness or mania can be caused by stimulants at usual doses. If such symptoms occur, consideration should be given to a possible causal role of the stimulant, and discontinuation of treatment may be appropriate. In a pooled analysis of multiple short-term, placebo-controlled studies, such symptoms occurred in about 0.1% (4 patients with events out of 3182 exposed to methylphenidate or amphetamine for several weeks at usual doses) of stimulant-treated patients compared to 0 in placebo-treated patients. Aggression: Aggressive behavior or hostility is often observed in children and adolescents with ADHD, and has been reported in clinical trials and the postmarketing experience of some medications indicated for the treatment of ADHD. Although there is no systematic evidence that stimulants cause aggressive behavior or hostility, patients beginning treatment for ADHD should be monitored for the appearance of or worsening of aggressive behavior or hostility. **Long-Term Suppression of Growth:** Careful follow-up of weight and height in children ages 7 to 10 years who were randomized to either methylphenidate or non-medication treatment groups over 14 months, as well as in naturalistic subgroups of newly methylphenidate-treated and non-medication treated children over 36 months (to the ages of 10 to 13 years), suggests that consistently modest children (i.e., treatment for 7 days per week throughout the year) have a temporary slowing in growth rate (on average, a total of about 2 cm less growth in height and 2.7 kg less growth in weight over 3 years), without evidence of growth rebound during the period of development. Published data are inadequate to determine whether chronic use of amphetamines may cause similar suppression of growth, however, it is anticipated that they likely have this effect as well. Therefore, growth should be monitored during treatment with stimulants, and patients who are not growing or gaining height or weight as expected may need to have their treatment interrupted. **Seizures:** There is some clinical evidence that stimulants may lower the convulsive threshold in patients with prior history of seizures, in patients with prior EEG abnormalities in absence of seizures, and, very rarely, in patients without a history of seizures and no prior EEG evidence of seizures. In the presence of seizures, the drug should be discontinued. **Visual Disturbance:** Difficulties with accommodation and depression of accommodation have been reported with stimulant treatment. Potential for Gastrointestinal Obstruction: Because the CONCERTA® tablet is nondispersible and does not appreciably change in shape in the GI tract, CONCERTA® should not be administered to patients with preexisting severe gastrointestinal narrowing (pathologic or iatrogenic, for example: esophageal motility disorders, small bowel intussusception, "short gut" syndrome due to adhesions or decreased transit time, past history of perforated, cystic fibrosis, chronic intestinal pseudo-obstruction, or Meckel's diverticulum). There have been rare reports of obstructive symptoms in patients with known strictures in association with the ingestion of drugs in nondispersible controlled-release formulations. Due to the controlled-release design of the tablet, CONCERTA® should only be used in patients who are able to swallow the tablet whole (see **PRECAUTIONS: Information for Patients**). **Use in Children Under Six Years of Age:** CONCERTA® should not be used in children under six years, since safety and efficacy in this age group have not been established.

## DRUG DEPENDENCE

CONCERTA® should be given cautiously to patients with a history of drug dependence or alcoholism. Chronic abusive use can lead to marked tolerance and psychological dependence with varying degrees of abnormal behavior. Frank psychotic episodes can occur, especially with parenteral abuse. Careful supervision is required during withdrawal from abusive use since severe depression may occur. Withdrawal following chronic therapeutic use may unmask symptoms of the underlying disorder that may require follow-up.

## PRECAUTIONS

**Hematologic Monitoring:** Periodic CBC, differential, and platelet counts are advised during prolonged therapy. **Information for Patients:** Prescribers or other health professionals should inform patients, their families, and their caregivers about the benefits and risks associated with treatment with methylphenidate and should counsel them in its appropriate use. A patient Medication Guide is available for CONCERTA®. The prescriber or health professional should instruct patients, their families, and their caregivers to read the Medication Guide and should assist them in understanding its contents. Patients should be given the opportunity to discuss the contents of the Medication Guide and to obtain answers to any questions they may have. The complete text of the Medication Guide is reprinted at the end of the full prescribing information. Patients should be informed that CONCERTA® should be swallowed whole with the aid of liquids. Tablets should not be chewed, divided, or crushed. The medication is contained within a nonabsorbable shell designed to release the drug at a controlled rate. The tablet shell, along with insoluble core components, is eliminated from the body; patients should not be concerned if they occasionally notice in their stool something that looks like a tablet. **Drug Interactions:** CONCERTA® should not be used in patients being treated (currently or within the preceding 2 weeks) with MAO inhibitors (see **CONTRAINDICATIONS, Monoamine Oxidase Inhibitors**). Because of possible increases in blood pressure, CONCERTA® should be used cautiously with vasopressor agents. Human pharmacologic studies have shown that methylphenidate may inhibit the metabolism of coumarin anticoagulants, anticonvulsants (e.g., phenobarbital, phenytoin, primidone), and some antidepressants (tricyclics and selective serotonin reuptake inhibitors). Downward dose adjustment of these drugs may be required when given concomitantly with methylphenidate. It may be necessary to adjust the dosage and monitor plasma drug concentrations (ox in the case of coumarin, coagulation times), when initiating or discontinuing concomitant methylphenidate. Serious adverse events have been reported in concomitant use with clonidine, although no causality for the combination has been established. The safety of using methylphenidate in combination with clonidine or other centrally acting alpha-2 agonists has not been systematically evaluated. **Carcinogenesis, Mutagenesis, and Impairment of Fertility:** In a lifetime carcinogenicity study carried out in B6C3F1 mice, methylphenidate caused an increase in hepatocellular adenomas and, in males only, an increase in hepatoblastomas at a daily dose of approximately 60 mg/kg/day. This dose is approximately 30 times and 4 times the maximum recommended human dose of CONCERTA® on a mg/kg and mg/m<sup>2</sup> basis, respectively. Hepatoblastomas is a relatively rare rodent malignant tumor type. There was no increase in total malignant hepatic tumors. The mouse strain used is sensitive to the development of hepatic tumors, and the significance of these results to humans is unknown. Methylphenidate did not cause any increases in tumors in a lifetime carcinogenicity study carried out in F344 rats; the highest dose used was approximately 45 mg/kg/day, which is approximately 22 times and 5 times the maximum recommended human dose of CONCERTA® on a mg/kg and mg/m<sup>2</sup> basis, respectively. In a 24-week carcinogenicity study in the transgenic mouse strain (p53<sup>+</sup>), which is sensitive to genotoxic carcinogens, there was no evidence of carcinogenicity. Male and female mice were fed diets containing the same concentration of methylphenidate as in the lifetime carcinogenicity study; the high-dose groups were exposed to 60 to 74 mg/kg/day of methylphenidate. Methylphenidate was not mutagenic in the *in vitro* Ames reverse mutation assay or in the *in vitro* mouse lymphoma cell forward mutation assay. Sister chromatid exchanges and chromosome aberrations were increased, indicative of a weak clastogenic response, in an *in vitro* assay in cultured Chinese Hamster Ovary cells. Methylphenidate was negative *in vivo* in males and females in the mouse bone marrow micronucleus assay. Methylphenidate did not impair fertility in male or female mice that were fed diets containing the drug in an 18-week Conjugated Breeding study. The study was conducted at doses up to 160 mg/kg/day, approximately 80 fold and 8 fold the highest recommended human dose of CONCERTA® on a mg/kg and mg/m<sup>2</sup> basis, respectively. **Pregnancy: Teratogenic Effects:** Pregnancy Category C. Methylphenidate has been shown to have teratogenic effects in rabbits when given in doses of 200 mg/kg/day, which is approximately 100 times and 40 times the maximum recommended human dose on a mg/kg and mg/m<sup>2</sup> basis, respectively. A reproduction study in rats revealed no evidence of harm to the fetus at oral doses up to 30 mg/kg/day, approximately 15 fold and 3 fold

the maximum recommended human dose of CONCERTA® on a mg/kg and mg/m<sup>2</sup> basis, respectively. The approximate plasma exposure to methylphenidate plus its main metabolite PPA in pregnant rats was 2 times that seen in trials in volunteers and patients with the maximum recommended dose of CONCERTA® based on the AUC. The safety of methylphenidate for use during human pregnancy has not been established. There are no adequate and well-controlled studies in pregnant women. CONCERTA® should be used during pregnancy only if the potential benefit justifies the potential risk to the fetus. **Nursing Mothers:** It is not known whether methylphenidate is excreted in human milk. Because many drugs are excreted in human milk, caution should be exercised if CONCERTA® is administered to a nursing woman. **Pediatric Use:** The safety and efficacy of CONCERTA® in children under 6 years old have not been established. Long-term effects of methylphenidate in children have not been well established (see **WARNINGS**).

## ADVERSE REACTIONS

The development program for CONCERTA® included exposures in a total of 2121 participants in clinical trials (1797 patients, 324 healthy adult subjects). These participants received CONCERTA® 18, 36, 54 and/or 72 mg/day. Children, adolescents, and adults with ADHD were evaluated in four controlled clinical studies, three open-label clinical studies and two clinical pharmacology studies. Adverse reactions were assessed by collecting adverse events, results of physical examinations, vital signs, weights, laboratory analyses, and ECGs. Adverse events during exposure were obtained primarily by general inquiry and recorded by clinical investigators using terminology of their own choosing. Consequently, it is not possible to provide a meaningful estimate of the proportion of individuals experiencing adverse events without first grouping similar types of events into a smaller number of standardized event categories. In the tables and listings that follow, COSTART terminology has been used to classify reported adverse events. The stated frequencies of adverse events represent the proportion of individuals who experienced, at least once, a treatment-emergent adverse event of the type listed. An event was considered treatment emergent if it occurred for the first time or worsened while receiving therapy following baseline evaluation. **Adverse Findings in Clinical Trials With CONCERTA®: Adverse Events Associated with Discontinuation of Treatment:** In the 4-week placebo-controlled, parallel-group trial in children (Study 3) one CONCERTA®-treated patient (0.9%), 11/106) and one placebo-treated patient (1.0%; 1/99) discontinued due to an adverse event (sadness and increase in tics, respectively). In the 2-week placebo-controlled phase of a trial in adolescents (Study 4), no CONCERTA®-treated patients (0%; 0/87) and 1 placebo-treated patient (1.1%; 1/90) discontinued due to an adverse event (increased mood irritability). In the open-label, long-term safety trials (Studies 5 and 6; one 24-month study in children aged 6 to 13 and one 9-month study in child, adolescent and adult patients treated with CONCERTA®) 6.7% (101/1514) of patients discontinued due to adverse events. These events with an incidence of ≥0.5% included: insomnia (1.5%), twitching (1.0%), nervousness (0.7%), emotional lability (0.7%), abdominal pain (0.7%), and anorexia (0.7%). **Treatment-Emergent Adverse Events Among CONCERTA®-treated Patients:** Table 1 enumerates, for a 4-week placebo-controlled, parallel-group trial (Study 3) in children with ADHD at CONCERTA® doses of 18, 36, or 54 mg/day, the incidence of treatment-emergent adverse events. The table includes only those events that occurred in 1% or more of patients treated with CONCERTA® where the incidence in patients treated with CONCERTA® was greater than the incidence in placebo-treated patients. The prescriber should be aware that these figures cannot be used to predict the incidence of adverse events in the course of usual medical practice where patient characteristics and other factors differ from those which prevailed in the clinical trials. Similarly, the cited frequencies cannot be compared with figures obtained from other clinical investigations involving different treatments, uses, and investigators. The cited figures, however, do provide the prescribing physician with some basis for estimating the relative contribution of drug and non-drug factors to the adverse event incidence rate in the population studied.

TABLE 1  
Incidence of Treatment-Emergent Events\* in a 4-Week Placebo-Controlled Clinical Trial of CONCERTA® in Children

| Body System | Preferred Term                    | CONCERTA® (n=106) | Placebo (n=99) |
|-------------|-----------------------------------|-------------------|----------------|
| General     | Headache                          | 14 %              | 10 %           |
|             | Abdominal pain (stomachache)      | 7 %               | 1 %            |
| Digestive   | Vomiting                          | 4 %               | 3 %            |
|             | Anorexia (loss of appetite)       | 4 %               | 0 %            |
| Nervous     | Irritability                      | 2 %               | 0 %            |
|             | Insomnia                          | 4 %               | 1 %            |
| Respiratory | Upper Respiratory Tract Infection | 8 %               | 5 %            |
|             | Cough increased                   | 4 %               | 2 %            |
|             | Pharyngitis                       | 4 %               | 3 %            |
|             | Sinusitis                         | 3 %               | 0 %            |

\* Events, regardless of causality, for which the incidence for patients treated with CONCERTA® was at least 1% and greater than the incidence among placebo-treated patients. Incidence has been rounded to the nearest whole number.

Table 2 lists the incidence of treatment-emergent adverse events for a 2-week placebo-controlled trial (Study 4) in adolescents with ADHD at CONCERTA® doses of 18, 36, 54 or 72 mg/day.

TABLE 2  
Incidence of Treatment-Emergent Events\* in a 2-Week Placebo-Controlled Clinical Trial of CONCERTA® in Adolescents

| Body System | Preferred Term    | CONCERTA® (n=87) | Placebo (n=90) |
|-------------|-------------------|------------------|----------------|
| General     | Accidental injury | 6 %              | 3 %            |
|             | Fever             | 3 %              | 0 %            |
|             | Headache          | 9 %              | 6 %            |
| Digestive   | Anorexia          | 2 %              | 0 %            |
|             | Diarrhea          | 2 %              | 0 %            |
|             | Vomiting          | 3 %              | 0 %            |
| Nervous     | Insomnia          | 5 %              | 0 %            |
|             | Pharyngitis       | 2 %              | 1 %            |
| Urogenital  | Rhinitis          | 3 %              | 2 %            |
|             | Dysmenorrhea      | 2 %              | 0 %            |

\* Events, regardless of causality, for which the incidence for patients treated with CONCERTA® was at least 2% and greater than the incidence among placebo-treated patients. Incidence has been rounded to the nearest whole number.

**Tics:** In a long-term uncontrolled study (n=432 children), the cumulative incidence of new onset of tics was 9% after 27 months of treatment with CONCERTA®. In a second uncontrolled study (n=682 children) the cumulative incidence of new onset tics was 1% (2/62 children). The treatment period was up to 9 months with mean treatment duration of 7.2 months. Hypertension: In the laboratory classroom clinical trials in children (Studies 1 and 2), both CONCERTA® and methylphenidate did increase resting pulse by an average of 2-6 bpm and produced average increases of systolic and diastolic blood pressure of roughly 1-4 mm Hg during the day, relative to placebo. In the placebo-controlled adolescent trial (Study 4), mean increases from baseline in resting pulse rate were observed with CONCERTA® and placebo at the end of the double-blind phase (5 and 3 beats/minute, respectively). Mean increases from baseline in blood pressure at the end of the double-blind phase for CONCERTA® and placebo-treated patients were 0.7 and 0.7 mm Hg (systolic) and 2.6 and 1.4 mm Hg (diastolic), respectively (see **WARNINGS**). **Post-Marketing Experience With CONCERTA®:** Post-marketing experiences with CONCERTA® have revealed spontaneous reports of the following adverse events: difficulties in visual accommodation, mydriasis, blurred vision, blood alkaline phosphatase increased, blood bilirubin increased, abnormal liver function test (e.g., transaminase elevation), bradycardia, palpitations, arrhythmia, chest discomfort, restlessness, Raynaud's phenomenon; erythema, hyperhidrosis, arthralgia, myalgia, muscle twitching, abnormal, paroxysmal response decreased, drug effect decreased, hypertension; weight decreased, leucopenia; white blood cell count abnormal, pancytopenia, thrombocytopenia, platelet count decreased; confusion, dizziness, disorientation, anorexia, and hypersensitivity reactions such as angioedema, anaphylactic reactions, urticarial swelling, bullous conditions, exfoliative conditions, urticaria, pruritus, NEC, rashes, eruptions, and exanthema. **HEC, Adverse Events With Other Methylphenidate HCl Products:** Nervousness and insomnia are the most common adverse reactions reported with other methylphenidate products. Other reactions include hypersensitivity (including skin rash, urticaria, fever, arthralgia, exfoliative dermatitis, erythema multiforme with histopathologic findings of necrotizing vasculitis, and thrombocytopenic purpura), anorexia, nausea, dizziness, headache, dyskinetic/drowsiness; blood pressure and pulse changes, both up and down, tachycardia, angina, abdominal pain; weight loss during prolonged therapy. There have been rare reports of Tourette's syndrome. Toxic psychosis has been reported. Although a definite causal relationship has not been established, the following have been reported in patients taking this drug: hepatic coma; isolated cases of cerebral arteritis and/or occlusion; anemia; transient depressed mood, a few instances of scalp hair loss. Very rare reports of neuroleptic malignant syndrome (NMS) have been received, and, in most of these, patients were concurrently receiving therapies associated with NMS. In a single report, a ten-year-old boy who had been taking methylphenidate for approximately 18 months experienced an NMS-like event within 45 minutes of ingesting his first dose of valproic acid. It is uncertain whether this case represented a drug-drug interaction, a response to either drug alone, or some other cause. In children, loss of appetite, abdominal pain, weight loss during prolonged therapy, insomnia, and tachycardia may occur more frequently, however, any of the other adverse reactions listed above may also occur.

## DRUG ABUSE AND DEPENDENCE

**Controlled Substance Class:** CONCERTA®, like other methylphenidate products, is classified as a Schedule II controlled substance by federal regulation. **Abuse, Dependence, and Tolerance:** See **WARNINGS** for boxed warning containing drug abuse and dependence information.

## OVERDOSAGE

**Signs and Symptoms:** Signs and symptoms of acute methylphenidate overdose, resulting primarily from overstimulation of the CNS and from excessive sympathomimetic effects, may include the following: vomiting, agitation, tremors, hyperreflexia, muscle twitching, convulsions (may be followed by coma), euphoria, confusion, hallucinations, delirium, sweating, flushing, headache, hyperpyrexia, tachycardia, palpitations, cardiac arrhythmias, hypertension, mydriasis, and dryness of mucous membranes. **Recommended Treatment:** Treatment consists of appropriate supportive measures. The patient must be protected against self-injury and against external stimuli that would aggravate overstimulation already present. Gastric contents may be evaluated by gastric lavage as indicated. Before performing gastric lavage, control agitation and seizures if present and protect the airway. Other measures to definity the gut include administration of activated charcoal and a cathartic. Intensive care must be provided to maintain adequate circulation and respiratory exchange; external cooling procedures may be required for hyperpyrexia. Efficacy of peritoneal dialysis or extracorporeal hemodialysis for CONCERTA® overdose has not been established. The prolonged release of methylphenidate from CONCERTA® should be considered when treating patients with overdose. **Poison Control Center:** As with the management of all overdose, the possibility of multiple drug ingestion should be considered. The physician may wish to consider contacting a poison control center for up-to-date information on the management of overdose with methylphenidate.

For more information call 1-888-440-7903 or visit [www.concerta360.com](http://www.concerta360.com)

Manufactured by  
Mylan Laboratories, Inc.  
Mountain View, CA 94043

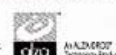

Distributed and Marketed by  
McNeil Pediatrics  
Division of McNeil-PPC, Inc.,  
Fort Washington, PA 19034

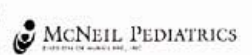

CONCERTA® and ORUS® are Registered Trademarks of ALZA Corporation.  
10025004 Edition: March 2007

60CON07/09/BS



## IMPORTANT CORRECTION OF DRUG INFORMATION ABOUT EFFEXOR XR® (VENLAFAXINE HCl) EXTENDED-RELEASE CAPSULES

An advertisement in professional journal publications for EFFEXOR XR® (venlafaxine HCl) Extended-Release Capsules for the treatment of major depressive disorder was the subject of a Warning Letter issued by the U.S. Food and Drug Administration (FDA) in December 2007. The FDA stated that the journal ad was misleading because it overstated the efficacy of EFFEXOR XR, made unsubstantiated superiority claims, and contained other unsubstantiated claims regarding EFFEXOR XR.

Wyeth would like to take this opportunity to clarify the content of the advertisement.

### Claims that Reference the Baldomero et al Study and Other Related Claims

The FDA objected to the claim, "In an open-label study of patients who failed previous antidepressant treatment, nearly 60% achieved remission when changed to EFFEXOR XR." The FDA determined that the Baldomero study (the cited reference for this claim) could not be relied upon as substantial evidence to support the claim due to the following reasons: (1) the study was an open-label study, which is not an appropriate study design to measure subjective end points because it fails to minimize potential bias; (2) the study did not include a placebo group, so there was no way to determine the actual effect size of the drug; and (3) the study did not provide information about whether EFFEXOR XR was superior to failed therapy because study subjects were not randomized to their previously failed therapy. Therefore, the FDA stated that the study failed to support the 60% remission rate claim as well as any conclusion that EFFEXOR XR is superior to other antidepressant treatments. In addition to the above claim, the FDA stated that other claims added to the misleading impression that patients who have failed previous antidepressant therapy can expect improvement when switching to EFFEXOR XR.

### Claims from the PREVENT Study

The FDA objected to the claim, "In the PREVENT study, the probability of preventing a new episode of depression was 92% with EFFEXOR XR in maintenance year 2 vs. 55% with placebo." The FDA stated that the cited claim overstated the efficacy of EFFEXOR XR by implying that the general patient population suffering from major depressive disorder can expect a 92% probability of preventing a recurrent depressive episode after two years of treatment when this is not supported by substantial evidence.

The cited study for this claim was a randomized, multicenter, double-blind study (n=1096) comparing EFFEXOR XR with placebo. The study was designed to provide efficacy data regarding recurrence prevention with EFFEXOR XR after two years of maintenance treatment. It followed patients through 4 different time periods: a 10-week acute period, a 6-month continuation period, an initial 12-month maintenance period (maintenance year 1), and a second 12-month maintenance period (maintenance year 2). At the end of each period, patients were only considered eligible for inclusion in the next period if they were still responding to the drug. Patients dropped out of the study during each of the periods for different reasons (eg, lack of efficacy, adverse events). At the start of each maintenance period, the remaining patients who still showed a response to EFFEXOR XR were re-randomized to EFFEXOR XR or placebo. Because a high percentage of EFFEXOR XR patients were either re-randomized to placebo or were discontinued from the study before entering maintenance year 2 and because only patients who responded to EFFEXOR XR were selected to continue to the next phase of treatment, the FDA determined that the results of the study could not be extrapolated to the general patient population suffering from major depressive disorder.

### Claim Regarding Clinical Experience and Number of Patients

The FDA objected to the claim, "More than 12 years of clinical experience and over 20 million patients treated with EFFEXOR/EFFEXOR XR." The claim of 20 million EFFEXOR/EFFEXOR XR patients was estimated from the number of U.S. prescriptions, average daily consumption, and average length of therapy. The FDA determined that this claim was misleading based on the referenced data because the calculations used did not reflect the number of "unique" patients. Because there are no unique patient-level data available for the entire 14-year period during which EFFEXOR/EFFEXOR XR has been on the U.S. market, the claim is no longer used in EFFEXOR XR promotional materials.

***Please see brief summary of Prescribing Information on adjacent pages.***

EFFEXOR® and EFFEXOR XR® are registered trademarks of Wyeth Pharmaceuticals Inc.

**Wyeth®** © 2008, Wyeth Pharmaceuticals Inc., Philadelphia, PA 19101 231275-01 August 2008



**BRIEF SUMMARY.** See package insert for full prescribing information. For further product information and current package insert, please visit [www.wyeth.com](http://www.wyeth.com) or call our medical communications department toll free at 1-800-934-5556.

**Suicidality and Antidepressant Drugs**

**Antidepressants increased the risk compared to placebo of suicidal thinking and behavior (suicidality) in children, adolescents, and young adults in short-term studies of Major Depressive Disorder (MDD) and other psychiatric disorders. Anyone considering the use of EFFEXOR XR or any other antidepressant in a child, adolescent, or young adult must balance this risk with the clinical need. Short-term studies did not show an increase in the risk of suicidality with antidepressants compared to placebo in adults beyond age 24; there was a reduction in risk with antidepressants compared to placebo in adults aged 65 and older. Depression and certain other psychiatric disorders are themselves associated with increases in the risk of suicide. Patients of all ages who are started on antidepressant therapy should be monitored appropriately and observed closely for clinical worsening, suicidality, or unusual changes in behavior. Families and caregivers should be advised of the need for close observation and communication with the prescriber. EFFEXOR XR is not approved for use in pediatric patients. (See WARNINGS: Clinical Worsening and Suicide Risk, PRECAUTIONS: Information for Patients, and PRECAUTIONS: Pediatric Use.)**

**CONTRAINDICATIONS:** Hypersensitivity to venlafaxine hydrochloride or to any excipients in the formulation. Concomitant use in patients taking monoamine oxidase inhibitors (MAOIs). **WARNINGS: Clinical Worsening and Suicide Risk—**Patients with major depressive disorder (MDD), both adult and pediatric, may experience worsening of their depression and/or the emergence of suicidal ideation and behavior (suicidality) or unusual changes in behavior, whether or not they are taking antidepressant medications, and this risk may persist until significant remission occurs. Suicide is a known risk of depression and certain other psychiatric disorders, and these disorders themselves are the strongest predictors of suicide. There has been a long-standing concern, however, that antidepressants may have a role in inducing worsening of depression and the emergence of suicidality in certain patients during the early phases of treatment. Pooled analyses of short-term placebo-controlled trials of antidepressant drugs (SSRIs and others) showed that these drugs increase the risk of suicidal thinking and behavior (suicidality) in children, adolescents, and young adults (ages 18-24) with MDD and other psychiatric disorders. Short-term studies did not show an increase in the risk of suicidality with antidepressants compared to placebo in adults beyond age 24; there was a reduction with antidepressants compared to placebo in adults aged 65 and older. The pooled analyses of placebo-controlled trials in children and adolescents with MDD, obsessive-compulsive disorder (OCD), or other psychiatric disorders included a total of 24 short-term trials of 9 antidepressant drugs in over 4,400 patients. The pooled analyses of placebo-controlled trials in adults with MDD or other psychiatric disorders included a total of 295 short-term trials (median duration of 2 months) of 11 antidepressant drugs in over 77,000 patients. There was considerable variation in risk of suicidality among drugs, but a tendency toward an increase in the younger patients for almost all drugs studied. There were differences in absolute risk of suicidality across the different indications, with the highest incidence in MDD. The risk differences (drug-placebo difference in the number of cases of suicidality per 1,000 patients treated) are provided in Table 1 of the full prescribing information. No suicides occurred in any of the pediatric trials. There were suicides in the adult trials, but the number was not sufficient to reach any conclusion about drug effect on suicide. It is unknown whether the suicidality risk extends to longer-term use. However, there is substantial evidence from placebo-controlled maintenance trials in adults with depression that the use of antidepressants can delay the recurrence of depression. **All patients being treated with antidepressants for any indication should be monitored appropriately and observed closely for clinical worsening, suicidality, and unusual changes in behavior, especially during the initial few months of a course of drug therapy, or at times of dose changes, either increases or decreases.** Anxiety, agitation, panic attacks, insomnia, irritability, hostility, aggressiveness, impulsivity, akathisia (psychomotor restlessness), hypomania, and mania have been reported in adult and pediatric patients being treated with antidepressants for MDD and other indications, both psychiatric and nonpsychiatric. Although a causal link between the emergence of such symptoms and either the worsening of depression and/or the emergence of suicidal impulses has not been established, there is concern that such symptoms may represent precursors to emerging suicidality. Consideration should be given to changing the therapeutic regimen, including possibly discontinuing the medication, in patients whose depression is persistently worse, or who are experiencing emergent suicidality or symptoms that might be precursors to worsening depression or suicidality, especially if these symptoms are severe, abrupt in onset, or were not part of the patient's presenting symptoms. If the decision has been made to discontinue treatment, medication should be tapered, as rapidly as is feasible, but with recognition that abrupt discontinuation can be associated with certain symptoms (see **PRECAUTIONS and DOSAGE AND ADMINISTRATION**). **Families and caregivers of patients being treated with antidepressants for MDD or other indications, both psychiatric and nonpsychiatric, should be alerted about the need to monitor patients for the emergence of agitation, irritability, unusual changes in behavior, and the other symptoms described above, as well as the emergence of suicidality, and to report such symptoms immediately to health care providers. Such monitoring should include daily observation by families and caregivers.** Prescriptions for Effexor XR should be written for the smallest quantity of capsules consistent with good patient management, in order to reduce the risk of overdose. **Screening Patients for Bipolar Disorder:** A major depressive episode may be the initial presentation of bipolar disorder. It is generally believed that treating such an episode with an antidepressant alone may increase the likelihood of precipitation of a mixed/manic episode in patients at risk for bipolar disorder. Whether any of the symptoms described above represent such a conversion is unknown. Prior to initiating antidepressant treatment, patients with depressive symptoms should be screened to determine if they are at risk for bipolar disorder; such screening should include a detailed psychiatric history, including a family history of suicide, bipolar disorder, and depression. **Effexor XR is not approved for use in treating bipolar depression. Potential for Interaction with MAOIs—****Adverse reactions, some serious, have been reported in patients who recently discontinued an MAOI and started on venlafaxine, or who recently discontinued venlafaxine prior to initiation of an MAOI. These reactions included tremor, myoclonus, diaphoresis, nausea, vomiting, flushing, dizziness, hyperthermia with features resembling neuroleptic malignant syndrome, seizures, and death. Effexor XR should not be used in combination with an MAOI, or within at least 14 days of discontinuing treatment with an MAOI. At least 7 days should be allowed after stopping venlafaxine before starting an MAOI. Serotonin Syndrome—**The development of potentially life-threatening serotonin syndrome may occur with Effexor XR treatment, particularly with (i) concomitant use of serotonergic drugs and (ii) with drugs that impair metabolism of serotonin (see **CONTRAINDICATIONS—MAOIs**). If concomitant treatment of Effexor XR with an SSRI, SNRI, or a 5-hydroxytryptamine receptor agonist (triptan) is clinically warranted, careful observation of the patient is advised, particularly during treatment initiation and dose increases. **Caution should be exercised when Effexor XR is used in combination with triptan supplements) is not recommended. Sustained Hypertension—**Venlafaxine is associated with sustained increases in blood pressure (BP) in some patients. Postmarketing cases of elevated BP requiring immediate treatment have been reported. Pre-existing hypertension should be controlled. Regular monitoring of BP is recommended. For patients experiencing sustained increase in BP, consider either dose reduction or discontinuation. **Elevations in Systolic and Diastolic Blood Pressure—**Across most indications, a dose-related increase in supine systolic and diastolic blood pressure was evident in EFFEXOR XR patients (for more information, see Table 4 of the full prescribing information). **Mydriasis—**Mydriasis has been reported; monitor patients with raised intraocular pressure or at risk of acute narrow-angle glaucoma (angle-closure glaucoma). **PRECAUTIONS: General—Discontinuation of treatment with Effexor XR.** Abrupt discontinuation or dose reduction of venlafaxine at various doses is associated with new symptoms, the frequency of which increased with increase in dose level and longer duration of treatment. Symptoms include agitation, anxiety, confusion, coordination impaired, diarrhea, dizziness, dry mouth, dysphoric mood, emotional lability, fasciculation, fatigue, headaches, hypomania, insomnia, irritability, lethargy, nausea, nervousness, nightmares, seizures, sensory disturbances (e.g., paresthesias such as electric shock sensations), somnolence, sweating, tinnitus, tremor, vertigo, and vomiting. Monitor patients when discontinuing treatment. A gradual reduction in the dose rather than abrupt cessation is recommended. If intolerable symptoms occur following a decrease in the dose or upon discontinuation of treatment, consider resuming the previously prescribed dose. Subsequently, continue decreasing the dose at a more gradual rate. **Insomnia and Nervousness:** Treatment-emergent insomnia and nervousness have been reported. In Phase 3 trials, insomnia led to drug discontinuation in 1% of both depressed patients and Panic Disorder (PD) patients, in 3% of Generalized Anxiety Disorder (GAD) patients, and in 2% of Social Anxiety Disorder (SAD) patients. Nervousness led to drug discontinuation in 0.9% of depressed patients, in 2% of GAD patients, and in 1% of SAD patients and 0.1% of PD patients. **Changes in Weight:** **Pediatric Patients:** In short-term MDD studies, 7% of Effexor XR patients had  $\geq 5\%$  loss of body weight and 0.1% discontinued for weight loss in 8-week studies. 3% of Effexor XR patients had  $\geq 7\%$  loss of body weight and 0.3% discontinued for weight loss in 8-week studies. In SAD trials of up to 6 months, 4% of Effexor XR patients had  $\geq 7\%$  loss of body weight and no patients discontinued for weight loss. In 12-week PD trials, 3% of Effexor XR patients had  $\geq 7\%$  loss of body weight, and no patients discontinued for weight loss. The safety and efficacy of venlafaxine in combination with weight loss agents, including phentermine, have not been established. Coadministration of Effexor XR and weight loss agents is not recommended. Effexor XR is not indicated for weight loss alone or in combination with other products. **Pediatric Patients:** Weight loss was seen in patients aged 6-17 receiving Effexor XR. More Effexor XR patients than placebo patients experienced weight loss of at least 3.5% in both the MDD and GAD studies (18% of Effexor XR patients vs. 3.6% of placebo patients;  $P < 0.001$ ) and the SAD study (47% of Effexor XR patients vs. 14% of placebo patients;  $P < 0.001$ ). Weight loss was not limited to patients with treatment-emergent anorexia (decreased appetite). Children and adolescents in a 6-month MDD study had increases in weight less than expected based on data from age- and sex-matched peers. The difference between observed and expected weight gain was larger for children  $< 12$  years old than for adolescents  $\geq 12$  years old. **Changes in Height: Pediatric Patients:** In 8-week GAD studies, Effexor XR patients aged 6-17 grew an average of 0.3 cm ( $n=122$ ), while placebo patients grew an average of 1.0 cm ( $n=132$ );  $P=0.041$ . This difference in height increase was most notable in patients  $< 12$ . In 8-week MDD studies, Effexor XR patients grew an average of 0.8 cm ( $n=146$ ), while placebo patients grew an average of 0.7 cm ( $n=147$ ). During the 16-week, placebo-controlled SAD study, both the Effexor XR ( $n=109$ ) and the placebo ( $n=112$ ) patients grew an average of 1.0 cm. In the 6-month MDD study, children and adolescents had height increases less than expected based on data from age- and

sex-matched peers. The difference between observed and expected growth rates was larger for children  $< 12$  years old than for adolescents  $\geq 12$  years old. **Changes in Appetite: Adult Patients:** Treatment-emergent anorexia was more commonly reported for Effexor XR (8%) than placebo (4%) patients in MDD studies. The discontinuation rate for anorexia was 1.0% in MDD studies. Treatment-emergent anorexia was more commonly reported for Effexor XR (8%) than placebo (2%) patients in GAD studies. The discontinuation rate for anorexia was 0.9% for up to 8 weeks in GAD studies. Treatment-emergent anorexia was more commonly reported for Effexor XR (17%) than placebo (2%) patients in SAD studies. The discontinuation rate for anorexia was 0.6% for up to 12 weeks in SAD studies; no patients discontinued for anorexia between week 12 and month 6. Treatment-emergent anorexia was more commonly reported for Effexor XR (8%) than placebo (3%) patients in PD studies. The discontinuation rate for anorexia was 0.4% for Effexor XR patients in 12-week PD studies. **Pediatric Patients:** Decreased appetite was seen in pediatric patients receiving Effexor XR. In GAD and MDD trials, 10% of Effexor XR patients aged 6-17 for up to 8 weeks and 3% of placebo patients had treatment-emergent anorexia. None of the patients receiving Effexor XR discontinued for anorexia or weight loss. In the placebo-controlled trial for SAD, 22% and 3% of patients aged 8-17 treated for up to 16 weeks with Effexor XR and placebo, respectively, reported treatment-emergent anorexia (decreased appetite). The discontinuation rates for anorexia were 0.7% and 0.0% for patients receiving Effexor XR and placebo, respectively; the discontinuation rates for weight loss were 0.7% for patients receiving either Effexor XR or placebo. **Activation of Mania/Hypomania:** Mania or hypomania has occurred during premarketing depression and PD studies. As with all drugs effective in the treatment of MDD, Effexor XR should be used cautiously in patients with a history of mania. **Hypонатremia:** Hyponatremia and/or the syndrome of inappropriate antidiuretic hormone secretion (SIADH) may occur with SSRIs and SNRIs, including venlafaxine. Patients taking diuretics or who are otherwise volume depleted and elderly patients may be at greater risk. Discontinuation of Effexor XR should be considered in patients with symptomatic hyponatremia, and appropriate medical intervention should be instituted. **Immediate Release Formulation:** The immediate release formulation is not approved for use in patients with a history of venlafaxine patients. Use cautiously in patients with a history of seizures. Discontinue in any patient who develops seizures. **Abnormal Bleeding:** SSRIs and SNRIs, including EFFEXOR XR, may increase the risk of bleeding events. Concomitant use of aspirin, nonsteroidal anti-inflammatory drugs, warfarin, and other anticoagulants may add to this risk. Bleeding events have ranged from ecchymoses, hematomas, epistaxes, and petechiae to life-threatening hemorrhages. **Serum Cholesterol Elevation:** Clinically relevant increases in serum cholesterol were seen in 5.3% of venlafaxine patients and 0.0% of placebo patients treated for at least 3 months in trials. Consider measurement of serum cholesterol levels during long-term treatment. **Interstitial Lung Disease and Eosinophilic Pneumonia:** These have been rarely reported. Consider the possibility of these events in venlafaxine patients who present with progressive dyspnea, cough, or chest discomfort. Such patients should undergo a prompt medical evaluation and should consider discontinuation of venlafaxine. **Use in Patients With Concomitant Illness:** Use Effexor XR cautiously in patients with diseases or conditions that could affect hemodynamic responses or metabolism. Venlafaxine has not been evaluated in patients with recent history of MI or unstable heart disease. Increases in QT interval (QTc) have been reported in clinical studies. Exercise caution in patients whose underlying medical conditions might be compromised by increases in heart rate. In patients with renal impairment or cirrhosis of the liver, the clearances of venlafaxine and its active metabolites were decreased, prolonging the elimination half-lives. It is recommended that the total daily dose be reduced by 50% in patients with mild to moderate hepatic impairment. In patients with cirrhosis, it may be necessary to reduce the dose even more than 50%. Individualization of dosing may be desirable. **Information for Patients—**Prescribers or other health professionals should inform patients, their families, and their caregivers about the benefits and risks associated with treatment with Effexor XR and should counsel them in its appropriate use. A Patient Medication Guide called "Antidepressant Medicines, Depression and Other Serious Mental Illnesses, and Suicidal Thoughts or Actions" is available for Effexor XR. The prescriber or health professional should instruct patients, their families, and their caregivers to read the Medication Guide and they should be given the Medication Guide when they are given the capsules. The prescriber should also discuss the contents of the Medication Guide and to obtain answers to any questions they may have. The complete text of the Medication Guide is available at [www.foxor.com](http://www.foxor.com) or in the approved prescribing information. Patients should be advised of the following issues and asked to alert their prescriber if these occur while taking Effexor XR. **Clinical Worsening and Suicide Risk:** Patients, their families, and their caregivers should be encouraged to be alert to the emergence of symptoms listed in **WARNINGS: Clinical Worsening and Suicide Risk**, especially those seen early during antidepressant treatment and when the dose is adjusted up or down. Families and caregivers of patients should be advised to look for the emergence of such symptoms on a day-to-day basis, since changes may be abrupt. Such symptoms should be reported to the patient's prescriber or health professional, especially if they are severe, abrupt in onset, or were not part of the patient's presenting symptoms. Symptoms such as these may be associated with an increased risk for suicidal thinking and behavior and indicate a need for very close monitoring and possibly changes in the medication. Caution patients 1) about operating hazardous machinery including automobiles, until they are reasonably sure that venlafaxine does not adversely affect their abilities; 2) to avoid alcohol while taking Effexor XR; 3) about the risk of serotonin syndrome with the concomitant use of Effexor XR and triptans, tramadol, tyrophan supplements, or other serotonergic agents; and 4) about the concomitant use of Effexor XR and NSAIDs, aspirin, warfarin, or other drugs that affect coagulation. Patients should be advised to notify their physician 1) if they become pregnant or intend to become pregnant during therapy, or if they are nursing; 2) about other prescription or over-the-counter drugs, including herbal preparations and nutritional supplements they are taking or plan to take; 3) if they develop a rash, hives, or related allergic phenomena; or 4) if they have a history of glaucoma or increased intraocular pressure. **Laboratory Tests—**No specific laboratory tests are recommended. **Drug Interactions—Alcohol:** A single dose of ethanol had no effect on the pharmacokinetics (PK) of venlafaxine or O-desmethylvenlafaxine (ODV), and venlafaxine did not exaggerate the psychomotor and psychometric effects induced by ethanol. **Cimetidine:** Use caution when administering venlafaxine with cimetidine to patients with pre-existing hypertension or hepatic dysfunction, and the elderly. **Diazepam:** The single dose of diazepam did not appear to affect the PK of either venlafaxine or ODV. Venlafaxine did not have any effect on the PK of diazepam or its active metabolite, desmethyldiazepam, or affect the psychomotor and psychometric effects induced by diazepam. **Haloperidol:** Venlafaxine decreased total oral-dose clearance of haloperidol, resulting in a 70% increase in haloperidol AUC. The haloperidol  $C_{max}$  increased 88%, but the haloperidol elimination half-life was unchanged. **Lithium:** A single dose of lithium did not appear to affect the PK of either venlafaxine or ODV. Venlafaxine had no effect on the PK of lithium. **Drugs Highly Bound to Plasma Proteins:** Venlafaxine is not highly bound to plasma proteins; coadministration of Effexor XR with a highly protein-bound drug should not cause increased free concentrations of the other drug. **Drugs That Interfere with Hemostasis:** Epidemiological studies that have demonstrated an association between use of drugs that interfere with serotonin reuptake and the occurrence of upper gastrointestinal bleeding have also shown that concurrent use of an NSAID or aspirin may potentiate this risk of bleeding. Increased bleeding has been reported when SSRIs and SNRIs are administered with warfarin. **Drugs That Inhibit Cytochrome P450 Isoenzymes:** CYP2D6 Inhibitors: Venlafaxine is metabolized to its active metabolite, ODV, by CYP2D6. Drugs inhibiting this isoenzyme have the potential to increase plasma concentrations of venlafaxine and decrease concentrations of ODV. No dosage adjustment is required when venlafaxine is coadministered with a CYP2D6 inhibitor. A pharmacokinetic study with ketoneazole 100 mg b.i.d. with a single dose of venlafaxine 50 mg in extensive metabolizers (EM;  $n=14$ ) and 25 mg in poor metabolizers (PM;  $n=6$ ) of CYP2D6 resulted in higher plasma concentrations of both venlafaxine and O-desmethylvenlafaxine (ODV) in most subjects following administration of ketoneazole. Concomitant use of CYP3A4 inhibitors and venlafaxine may increase levels of venlafaxine and ODV; therefore, caution is advised if a patient's therapy includes a CYP3A4 inhibitor and venlafaxine concomitantly. **Drugs Metabolized by Cytochrome P450 Isoenzymes:** Venlafaxine is a relatively weak inhibitor of CYP2D6. Venlafaxine did not inhibit CYP1A2 and CYP3A4, CYP2C9 (in vitro), or CYP2C19. **Imipramine:** Venlafaxine did not affect the PK of imipramine and 2-OH-imipramine. However, desipramine AUC,  $C_{max}$ , and  $t_{1/2}$  were increased by 25%, 23%, and 33%, respectively, in the presence of venlafaxine. **Indinavir:** The single daily 800 mg indinavir did not affect the PK of venlafaxine and ODV. **Metoprolol:** In a PK study with 18 healthy males, metoprolol and venlafaxine were coadministered for 5 days. Plasma concentrations of metoprolol increased about 30%-40%. Plasma concentrations of metoprolol's active metabolite were unaltered. Metoprolol did not alter the PK of venlafaxine or ODV. Venlafaxine appeared to reduce the BP lowering effect of metoprolol in this study. Clinical relevance for hypertensive patients is unknown. Exercise caution when coadministering venlafaxine and metoprolol (see **WARNINGS—Sustained Hypertension**). **Risperidone:** Venlafaxine slightly inhibited the CYP2D6-mediated metabolism of risperidone to its active metabolite, 9-hydroxyrisperidone, resulting in a ~32% increase in risperidone AUC. Venlafaxine coadministration did not significantly alter the PK profile of the total active moiety (risperidone plus 9-hydroxyrisperidone). **CYP3A4:** Venlafaxine did not inhibit CYP3A4 in vitro and in vivo. **Indinavir:** In a study of 9 healthy volunteers, venlafaxine administration resulted in a 28% decrease in the AUC of a single dose of indinavir and a 30% decrease in indinavir  $C_{max}$ . Indinavir did not affect the PK of venlafaxine and ODV. **CYP1A2:** Venlafaxine did not inhibit CYP1A2 in vitro and in vivo. **CYP2C9:** Venlafaxine did not inhibit CYP2C9 in vivo. In vivo, venlafaxine 75 mg by mouth every 12 hours did not alter the PK of a single 550-mg dose of tolbutamide or the CYP2C9-mediated formation of 4-hydroxy-tolbutamide. **CYP2C19:** Venlafaxine did not inhibit the metabolism of diazepam, which is partially metabolized by CYP2C19 (see **Diazepam** above). **MAOIs:** See **CONTRAINDICATIONS and WARNINGS: CNS-Active Drugs:** Use caution with concomitant use of venlafaxine and other CNS-active drugs. **Serotonergic Drugs and Triptans:** (see **WARNINGS: Serotonin Syndrome**): Based on the mechanism of action of Effexor XR and the potential for serotonin syndrome, caution is advised when Effexor XR is coadministered with other drugs that may affect the serotonergic neurotransmitter systems, such as triptans, SSRIs, other SNRIs, linezolid, lithium, tramadol, or St. John's wort. If concomitant treatment of Effexor XR with these drugs is clinically warranted, careful observation of the patient is advised, particularly during treatment initiation and dose increases. The concomitant use of Effexor XR with triptan supplements is not recommended. **Electroconvulsive Therapy (ECT):** There are no clinical data establishing the benefit of ECT combined with Effexor XR treatment. **Carcinogenesis, Mutagenesis, Impairment of Fertility: Carcinogenesis:** There was no increase in tumors in mice and rats given up to 1.7 times the maximum recommended human dose (MRHD) on a mg/m<sup>2</sup> basis. **Mutagenesis:** Venlafaxine and ODV were not mutagenic in the Ames reverse mutation assay in *Salmonella* bacteria or the CHO/HGPRT mammalian cell forward gene mutation assay. Venlafaxine was not clastogenic in several assays. ODV elicited a clastogenic response in the in vivo chromosomal aberration assay in rat bone marrow. **Impairment of Fertility:** No effects on reproduction or fertility in rats were noted at oral doses of up to 2 times the MRHD on a mg/m<sup>2</sup> basis. **Pregnancy—Teratogenic Effects—Pregnancy Category C:** Reproduction studies in rats given 2.5 times, and rabbits given 4 times the MRHD (mg/m<sup>2</sup> basis) revealed no malformations in offspring. However, in rats given 2.5 times the MRHD, there was a decrease in pup weight, an increase in stillborn pups, and an increase in pup deaths during the first 5 days of lactation, and dosing began during pregnancy and continued until weaning. There are adequate and well-controlled studies in pregnant women; use Effexor XR during pregnancy only if clearly needed. **Nonteratogenic Effects:** Neonates exposed to Effexor XR late in the third trimester have developed complications requiring prolonged hospitalization, respiratory support, and tube feeding. Complications can arise immediately upon delivery. Reports include respiratory distress, cyanosis, apnea, seizures, temperature instability, feeding difficulty, hypoglycemia, hypotonia, hypertonica, hyperreflexia, tremor, jitteriness, irritability, and constant crying. This is consistent with a direct toxic effect of SNRIs or a drug discontinuation syndrome. In some cases, it is consistent with serotonin syndrome. When treating a pregnant woman with Effexor XR during the third trimester, carefully consider the potential risks and benefits of

treatment and consider tapering Effexor XR in the third trimester. **Labor, Delivery, Nursing**—The effect on labor and delivery in humans is unknown. Venlafaxine and ODV have been reported to be excreted in human milk. Because of the potential for serious adverse reactions in nursing infants from Effexor XR, a decision should be made whether to discontinue nursing or to discontinue the drug, taking into account the importance of the drug to the mother. **Pediatric Use**—Safety and effectiveness in the pediatric population have not been established (see **BOX WARNINGS** and **WARNINGS: Clinical Worsening and Suicide Risk**). No studies have adequately assessed the impact of Effexor XR on growth, development, and maturation of children and adolescents. Studies suggest Effexor XR may adversely affect weight and height (see **PRECAUTIONS-General, Changes in Height and Changes in Weight**). Should the decision be made to treat a pediatric patient with Effexor XR, regular monitoring of weight and height is recommended during treatment, particularly if long term. The safety of Effexor XR for pediatric patients has not been assessed for chronic treatment >6 months. In studies in patients aged 6-17, blood pressure and cholesterol increases considered to be clinically relevant were similar to that observed in adult patients. The precautions for adults apply to pediatric patients. **Geriatric Use**—No overall differences in effectiveness or safety were observed between geriatric and younger patients. Greater sensitivity of some older individuals cannot be ruled out. SSRI and SNRI, including Effexor XR, have been associated with cases of clinically significant hyponatremia in elderly patients, who may be at greater risk for this adverse event (see **PRECAUTIONS-Hyponatremia**). **ADVERSE REACTIONS: Associated with Discontinuation of Treatment**—The most common events leading to discontinuation in MDD, GAD, SAD, and PD trials included nausea, anorexia, anxiety, impotence, dry mouth, dizziness, insomnia, somnolence, hypertension, diarrhea, paresthesia, tremor, abnormal (mostly blurred) vision, abnormal (mostly delayed) ejaculation, asthenia, vomiting, nervousness, headache, vasodilatation, thinking abnormal, decreased libido, and sweating. **Commonly Observed Adverse Events in Controlled Clinical Trials for MDD, GAD, SAD, and PD—Body as a Whole**: asthenia, headache, flu syndrome, accidental injury, abdominal pain. **Cardiovascular**: vasodilatation, hypertension, palpitation. **Digestive**: nausea, constipation, anorexia, vomiting, flatulence, diarrhea, eructation. **Metabolic/Nutritional**: weight loss. **Nervous System**: dizziness, somnolence, insomnia, dry mouth, nervousness, abnormal dreams, tremor, depression, hypertonia, paresthesia, libido decreased, agitation, anxiety, twitching. **Respiratory System**: pharyngitis, yawn, sinusitis. **Skin**: sweating. **Special Senses**: abnormal vision. **Urogenital System**: abnormal ejaculation, impotence, orgasmic dysfunction (including anorgasmia) in females. **Vital Sign Changes**: Effexor XR was associated with a mean increase in pulse rate of about 2 beats/min in depression and GAD trials and a mean increase in pulse rate of 3 beats/min in SAD trials. (see **Sustained Hypertension and Elevations in Systolic and Diastolic Blood Pressure** sections of **WARNINGS**). **Laboratory Changes**: Clinically relevant increases in serum cholesterol were noted in Effexor XR clinical trials. Increases were duration dependent over the study period and tended to be greater with higher doses. **Other Events Observed During the Premarketing Evaluation of Effexor and Effexor XR**—N=7,212. "Frequent"—events occurring in at least 1/100 patients; "infrequent"—1/100 to 1/1000 patients; "rare"—fewer than 1/1000 patients. **Body as a whole**: Frequent: chest pain substernal, chills, fever, neck pain; Infrequent: face edema, intentional injury, malaise, moniliiasis, neck rigidity, pelvic pain, photosensitivity reaction, suicide attempt, withdrawal syndrome; Rare: appendicitis, bacteremia, carcinoma, cellulitis, granuloma. **Cardiovascular system**: Frequent: migraine, tachycardia; Infrequent: angina pectoris, arrhythmia, extrasystoles, hypotension, peripheral vascular disorder (mainly cold feet and/or cold hands), postural hypotension, syncope; Rare: aortic aneurysm, arteritis, first-degree atrioventricular block, bigeminy, bundle branch block, capillary fragility, cerebral ischemia, coronary artery disease, congestive heart failure, heart arrest, hematomia, cardiovascular disorder (mitral valve and circulatory disturbance), mucocutaneous hemorrhage, myocardial infarct, pallor, sinus arrhythmia, thrombophlebitis. **Digestive system**: Frequent: increased appetite; Infrequent: bruxism, colitis, dysphagia, tongue edema, eructation, esophagitis, gastritis, gastroenteritis, gastrointestinal ulcer, gingivitis, glossitis, rectal hemorrhage, hemorrhoids, melena, oral moniliiasis, stomatitis, mouth ulceration; Rare: abdominal distension, biliary pain, cheilitis, cholecystitis, cholelithiasis, esophageal spasms, duodenitis, hematemesis, gastroesophageal reflux disease, gastrointestinal hemorrhage, gum hemorrhage, hepatitis, ileitis, jaundice, intestinal obstruction, liver tenderness, parotitis, periodontitis, proctitis, rectal disorder, salivary gland enlargement, increased salivation, soft stools, tongue discoloration. **Endocrine system**: Rare: galactorrhea, goiter, hyperthyroidism, hypothyroidism, thyroid nodule, thyroiditis. **Hemic and lymphatic system**: Frequent: ecchymosis, infrequent: leukopenia, lymphadenopathy, thrombocytopenia; Rare: basophilia, bleeding time increased, cyanosis, eosinophilia, lymphocytosis, multiple myeloma, purpura, thrombocytopenia. **Metabolic and nutritional**: Frequent: edema, weight gain; Infrequent: alkaline phosphatase increased, dehydration, hypercholesterolemia, hyperglycemia, hyperlipidemia, hypokalemia, SGOT increased, SGPT increased, thirst; Rare: alcohol intolerance, bilirubinemia, BUN increased, creatinine increased, diabetes mellitus, glycosuria, gout, healing abnormal, hemochromatosis, hypercalciuria, hyperkalemia, hyperphosphatemia, hyperuricemia, hypochlosterolemia, hypoglycemia, hyponatremia, hypophosphatemia, hypoproteinemia, uremia. **Musculoskeletal system**: Infrequent: arthritis, arthrosis, bone spurs, bursitis, leg cramps, myasthenia, tenosynovitis; Rare: bone pain, pathological fracture, muscle cramp, muscle spasms, musculoskeletal stiffness, myopathy, osteoporosis, osteosclerosis, plantar fasciitis, rheumatoid arthritis, tendon rupture. **Nervous system**: Frequent: amnesia, confusion, depersonalization, hypesthesia, thinking abnormal, trismus, vertigo; Infrequent: akathisia, apathy, ataxia, circumoral paresthesia, CNS stimulation, emotional lability, euphoria, hallucinations, hostility, hyperesthesia, hyperkinesia, hypotonia, incoordination, libido increased, manic reaction, myoclonus, neuralgia, neuropathy, psychomotor retardation, abnormal speech, stupor, suicidal ideation; Rare: abnormal/changed behavior, adjustment disorder, akinesia, alcohol abuse, aphasia, bradykinesia, buccoglossal syndrome, cerebrovascular accident, feeling drunk, loss of consciousness, delusions, dementia, dystonia, energy increased, facial paralysis, abnormal gait, Guillain-Barré syndrome, homicidal ideation, hyperchlorhydria, hypokinesia, hysteria, impulse control difficulties, motion sickness, neuritis, nystagmus, paranoid reaction, paresis, psychotic depression, reflexes decreased, reflexes increased, torticollis. **Respiratory system**: Frequent: cough increased, dyspnea; Infrequent: asthma, chest congestion, epistaxis, hyperventilation, laryngismus, laryngitis, pneumonia, voice alteration; Rare: atelectasis, hemoptysis, hypoventilation, hypoxia, larynx edema, pleurisy, pulmonary embolus, sleep apnea. **Skin and appendages**: Frequent: pruritus; Infrequent: acne, alopecia, contact dermatitis, dry skin, eczema, maculopapular rash, psoriasis, urticaria; Rare: brittle nails, erythema nodosum, exfoliative dermatitis, lichenoid dermatitis, hair discoloration, skin discoloration, furunculosis, hirsutism, leukoderma, miliaria, petechial rash, pruritic rash, pustular rash, vesiculobullous rash, seborrhea, skin atrophy, skin hypertrophy, skin striae, sweating decreased. **Special senses**: Frequent: abnormality of accommodation, mydriasis, taste perversion; Infrequent: conjunctivitis, diplopia, dry eyes, eye pain, otitis media, parosmia, photophobia, taste loss; Rare: blepharitis, cataract, chromatopsia, conjunctival edema, corneal lesion, deafness, exophthalmos, eye hemorrhage, glaucoma, retinal hemorrhage, subconjunctival hemorrhage, hyperacusis, keratitis, labyrinthitis, miosis, papilledema, decreased pupillary reflex, otitis externa, scleritis, uveitis, visual field defect. **Urogenital system**: Frequent: albuminuria, urination impaired; Infrequent: amenorrhea, cystitis, dysuria, hematuria, kidney calculus, kidney pain, leukorrhea, menorrhagia, metrorrhagia, nocturia, breast pain, polyuria, pyuria, prostatic disorder (prostatitis, enlarged prostate, and prostate irritability), urinary incontinence, urinary retention, urinary urgency, vaginal hemorrhage, vaginitis; Rare: abortion, anuria, balanitis, bladder pain, breast discharge, breast engorgement, breast enlargement, endometriosis, female lactation, fibrocystic breast, calcium crystalluria, cystitis, ovarian cyst, prolonged erection, gynecostasia (male), hypomenorrhea, kidney function abnormal, mastitis, menopause, pyelonephritis, oliguria, salpingitis, urolithiasis, urine hemorrhage, uterine spasm, vaginal dryness. **Postmarketing Reports**: agranulocytosis, anaphylaxis, aplastic anemia, catatonias, congenital anomalies, CPK increased, deep vein thrombophlebitis, delirium, EKG abnormalities such as QT prolongation; cardiac arrhythmias including atrial fibrillation, supraventricular tachycardia, ventricular extrasystoles, and rare reports of ventricular fibrillation and ventricular tachycardia, including torsades de pointes; toxic epidermal necrolysis/Stevens-Johnson syndrome, erythema multiforme, extrapyramidal symptoms (including dyskinesia and tardive dyskinesia), angle-closure glaucoma, hemorrhage (including eye and gastrointestinal bleeding), hepatic events (including GGT elevation; abnormalities of unspecified liver function tests; liver damage, necrosis, or failure; and fatty liver), interstitial lung disease, involuntary movements, LDH increased, neuroleptic malignant syndrome-like events (including a case of a 10-year-old who may have been taking methylphenidate, was treated and recovered), neutropenia, night sweats, priapitis, prostatitis, panic, placental infarction, prolonged erection, syncope, syncope, syncope, syncope, shock-like electrical sensations or tinnitus (in some cases, subsequent to the discontinuation of venlafaxine or tapering of dose), and SIADH (usually in the elderly). Elevated clozapine levels that were temporally associated with adverse events, including seizures, have been reported following the addition of venlafaxine. Increases in prothrombin time, partial thromboplastin time, or INR have been reported when venlafaxine was given to patients on warfarin therapy. **DRUG ABUSE AND DEPENDENCE**: Effexor XR is not a controlled substance. Evaluate patients carefully for history of drug abuse and observe such patients closely for signs of misuse or abuse. **OVERDOSAGE**: The most commonly reported events in overdose include tachycardia, changes in level of consciousness (ranging from somnolence to coma), mydriasis, seizures, and vomiting. Electrocardiogram changes (eg, prolongation of QT interval, bundle branch block, QRS prolongation), ventricular tachycardia, bradycardia, hypotension, rhabdomyolysis, vertigo, liver necrosis, serotonin syndrome, and death have been reported. Published retrospective studies report that venlafaxine overdose may be associated with an increased risk of fatal outcomes compared to that observed with SSRI antidepressant products, but lower than that for tricyclic antidepressants. Epidemiological studies have shown that venlafaxine-treated patients have a higher pre-existing burden of suicide risk factors than SSRI-treated patients. The extent to which the finding of an increased risk of fatal outcomes can be attributed to the toxicity of venlafaxine in overdose as opposed to some characteristic(s) of venlafaxine-treated patients is not clear. Treatment should consist of those general measures employed in the management of overdose with any antidepressant. Ensure an adequate airway, oxygenation and ventilation. Monitor cardiac rhythm and vital signs. General supportive and symptomatic measures are also recommended. Induction of emesis is not recommended. Gastric lavage with a large bore orogastric tube with appropriate airway protection, if needed, may be indicated if performed soon after ingestion or in symptomatic patients. Activated charcoal should be administered. Due to the large volume of distribution of this drug, forced diuresis, dialysis, hemoperfusion, and exchange transfusion are unlikely to be of benefit. No specific antidotes for venlafaxine are known. In managing overdose, consider the possibility of multiple drug involvement. Consider contacting a poison control center for additional information on the treatment of overdose. Telephone numbers for certified poison control centers are listed in the Physicians' Desk Reference® (PDR). **DOSE AND ADMINISTRATION**: Consult full prescribing information for dosing instructions. **Switching Patients to or From an MAOI**—At least 14 days should elapse between discontinuation of an MAOI and initiation of therapy with Effexor XR. At least 7 days should be allowed after stopping Effexor XR before starting an MAOI (see **CONTRAINDICATIONS** and **WARNINGS**). This brief summary is based on Effexor XR, Prescribing Information W10404C036 ET01, revised February 2008.

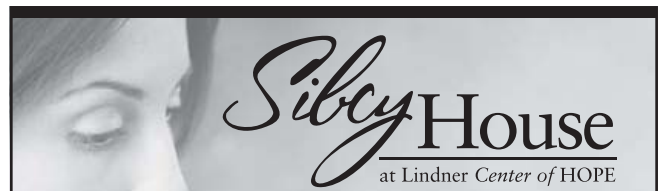

Like a warm embrace, Sibcy House at Lindner Center of HOPE completely envelops individuals at critical points in their mental illness, ensuring progress and a return to productivity in their lives. Sibcy House provides comprehensive care for mental health problems in an exclusive, voluntary live-in setting. Residents have access to a team of nationally recognized clinicians, who formulate a diagnosis and design an individualized approach to recovery and well-being. Residents participate in proven, evidence-based strategies for improving their health.

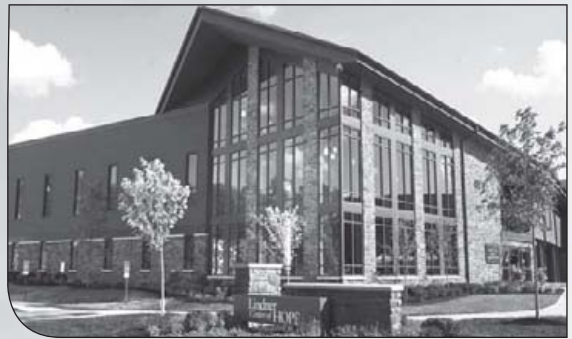

Lindner Center of HOPE is affiliated with  UNIVERSITY of Cincinnati

- **Excellence:** 16-bed, voluntary, live-in, expert diagnostic and treatment facility
- **Comfort:** Therapeutic retreat-like environment that is discrete, safe and open
- **Comprehensive:** Thorough assessments using standardized instruments and measures
- **Expertise:** Evidence-based and expert driven psychopharmacologic and psychotherapeutic interventions
- **Individualized:** Highly specialized treatment plans, tailored to specific needs
- **Collaborative:** Communication with referring care providers before, during and after the treatment stay
- **Specialized:** Addictions treatment tracks for co-occurring alcohol/drug problems and "intensive diagnostic evaluation only" tracks available

513-536-0537 or 888-536-HOPE (4673)

[www.sibcyhouse.org](http://www.sibcyhouse.org)





*Bipolar I Disorder*  
*Manic or Mixed*

It's hard enough being a teenager

It's even harder with  
a serious mental illness



*Schizophrenia*



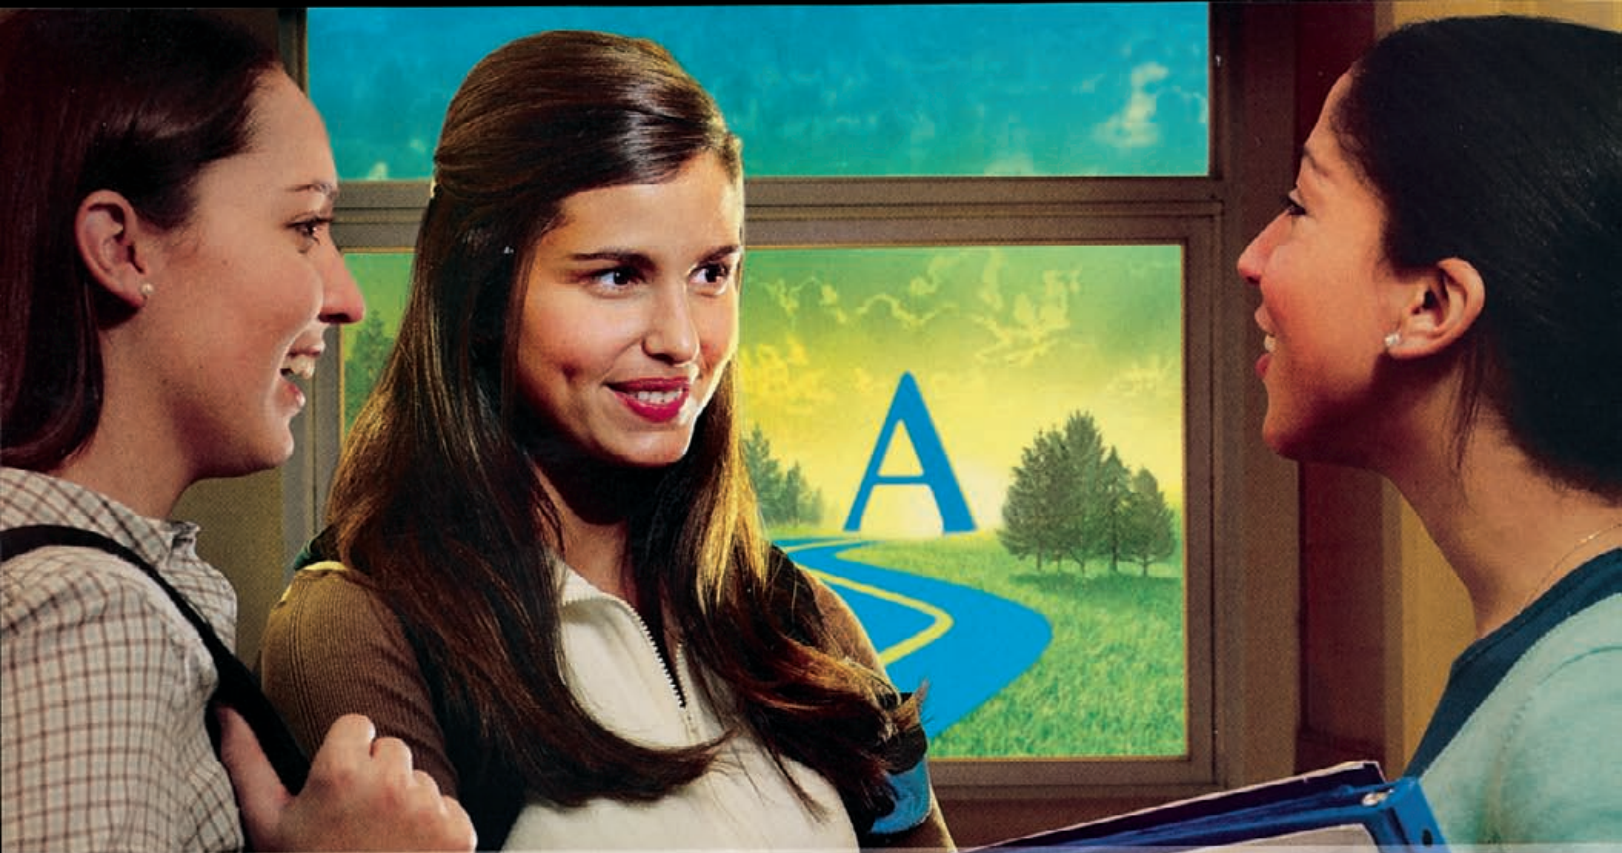

Acute and maintenance treatment of Manic and Mixed episodes associated with Bipolar I Disorder with or without psychotic features in pediatric patients 10 to 17 years of age.

## Help reveal the person within

ABILIFY is indicated for acute and maintenance treatment of Schizophrenia in adolescents 13 to 17 years of age.

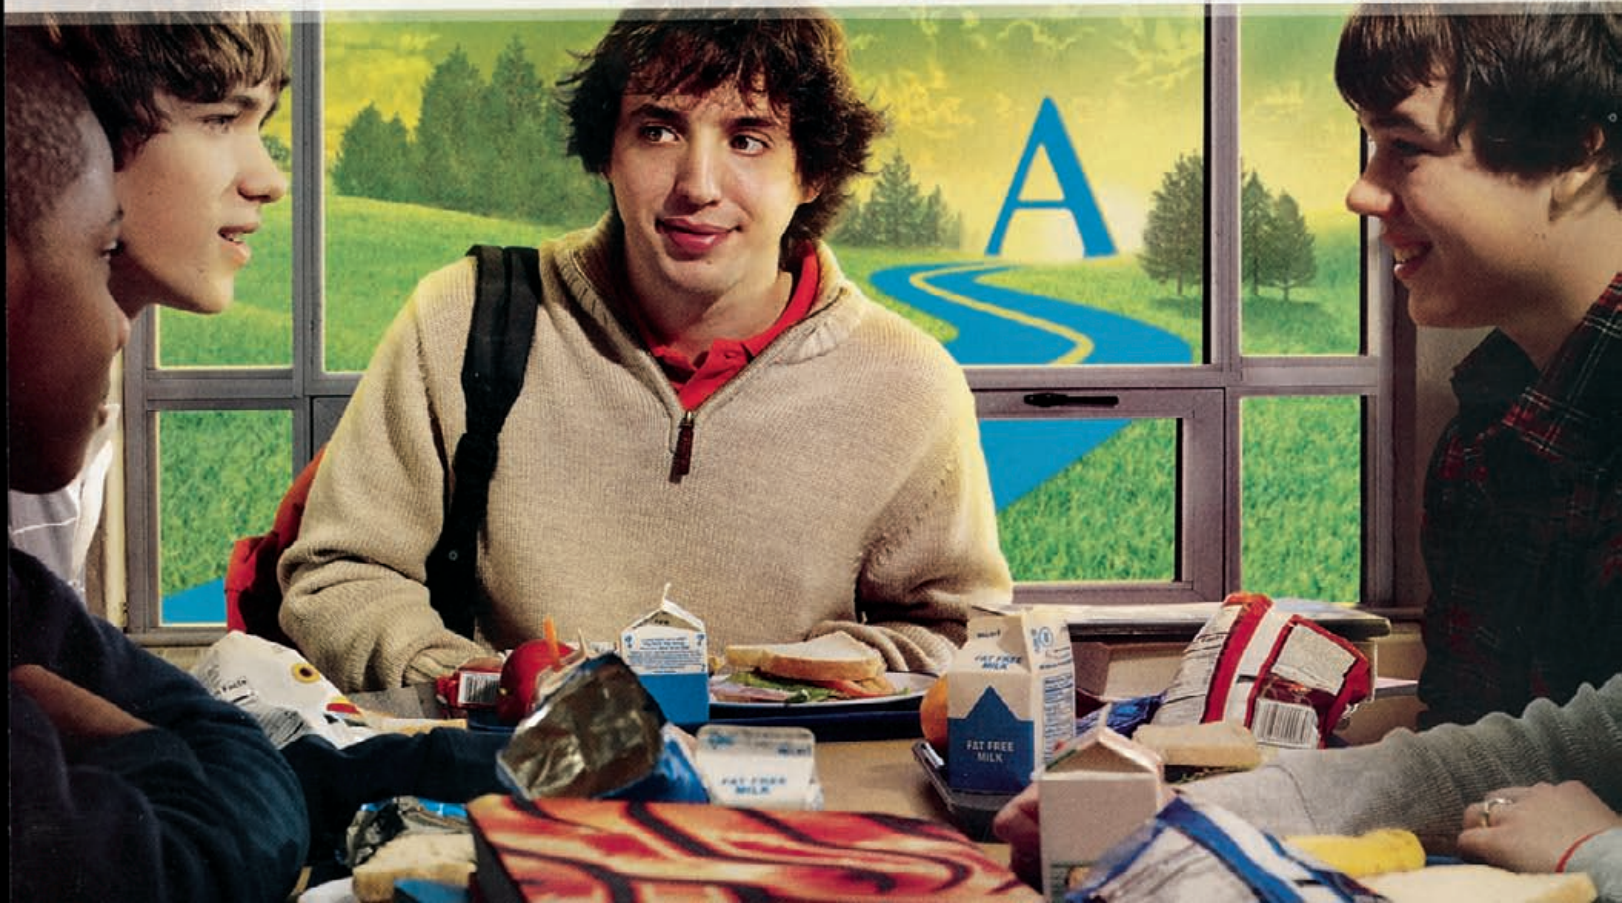





## Proven effective

### Pediatric Bipolar I Disorder, Manic or Mixed (aged 10 to 17)

- Significant results demonstrated by mean change in Y-MRS Total Score at study endpoint (Week 4), in a randomized, placebo-controlled trial in pediatric patients with Bipolar I Disorder, Manic or Mixed<sup>1</sup>

### Adolescent Schizophrenia (aged 13 to 17)

- Significant results demonstrated by mean change in PANSS™ Total Score at study endpoint (Week 6), in a randomized, placebo-controlled trial in adolescents with schizophrenia<sup>2</sup>
- High completion rate in large clinical trials of pediatric patients with Bipolar I Disorder, Manic or Mixed (N=296), and adolescents with Schizophrenia (N=302)<sup>1,2</sup>

Antidepressants increased the risk compared to placebo of suicidal thinking and behavior (suicidality) in children, adolescents, and young adults in short-term studies of Major Depressive Disorder (MDD) and other psychiatric disorders. Patients of all ages who are started on antidepressant therapy should be monitored appropriately and observed closely for clinical worsening, suicidality, or unusual changes in behavior, especially during the initial few months of therapy, or at times of dose changes. ABILIFY is not approved for use in pediatric patients with depression (see Boxed WARNING).

Commonly observed adverse reactions ( $\geq 5\%$  incidence and at least twice the rate of placebo for ABILIFY vs placebo, respectively):

- Pediatric patients (10 to 17 years) with bipolar mania: somnolence (23% vs 3%), extrapyramidal disorder (20% vs 3%), fatigue (11% vs 4%), nausea (11% vs 4%), akathisia (10% vs 2%), blurred vision (8% vs 0%), salivary hypersecretion (6% vs 0%), and dizziness (5% vs 1%)
- Adolescents (13 to 17 years) with Schizophrenia: extrapyramidal disorder (17% vs 5%), somnolence (16% vs 6%), and tremor (7% vs 2%)

The efficacy of ABILIFY for the maintenance treatment of Bipolar I Disorder or Schizophrenia in the pediatric population has not been evaluated. Maintenance efficacy can be extrapolated from adult data along with comparisons of ABILIFY pharmacokinetic parameters in adult and pediatric patients. Thus, it is generally recommended that responding patients be continued beyond the acute response, but at the lowest dose needed to maintain remission. Patients should be periodically reassessed to determine the need for maintenance treatment.

Please see IMPORTANT SAFETY INFORMATION, including **Boxed WARNINGS**, on next page.

Y-MRS: Young Mania Rating Scale.  
PANSS™ (Positive and Negative Syndrome Scale)  
is a trademark of Multi-Health Systems, Inc.



**ABILIFY**  
(aripiprazole)  
TABLETS and ORAL SOLUTION 1 mg/mL

HELP ILLUMINATE THE PERSON WITHIN



**ABILIFY® (aripiprazole) Tablets**  
**ABILIFY DISCMELT® (aripiprazole) Orally Disintegrating Tablets**  
**ABILIFY™ (aripiprazole) Oral Solution**

Brief Summary of Prescribing Information. For complete prescribing information consult official package insert.

**WARNINGS: INCREASED MORTALITY IN ELDERLY PATIENTS WITH DEMENTIA-RELATED PSYCHOSIS AND SUICIDALITY AND ANTI-DEPRESSANT DRUGS**

Elderly patients with dementia-related psychosis treated with atypical antipsychotic drugs are at an increased risk of death compared to placebo. Analyses of seventeen placebo-controlled trials (modal duration of 10 weeks) in these patients revealed a risk of death in the drug-treated patients of between 1.6 to 1.7 times that seen in placebo-treated patients. Over the course of a typical 10-week controlled trial, the rate of death in drug-treated patients was about 4.5%, compared to a rate of about 2.6% in the placebo group. Although the causes of death were varied, most of the deaths appeared to be either cardiovascular (eg, heart failure, sudden death) or infectious (eg, pneumonia) in nature. ABILIFY (aripiprazole) is not approved for the treatment of patients with dementia-related psychosis [see Warnings and Precautions].

Anti-depressants increased the risk compared to placebo of suicidal thinking and behavior (suicidality) in children, adolescents, and young adults in short-term studies of Major Depressive Disorder (MDD) and other psychiatric disorders. Anyone considering the use of adjunctive ABILIFY or any other antidepressant in a child, adolescent, or young adult must balance this risk with the clinical need. Short-term studies did not show an increase in the risk of suicidality with antidepressants compared to placebo in adults beyond age 24; there was a reduction in risk with antidepressants compared to placebo in adults aged 65 and older. Depression and certain other psychiatric disorders are themselves associated with increases in the risk of suicide. Patients of all ages who are started on antidepressant therapy should be monitored appropriately and observed closely for clinical worsening, suicidality, or unusual changes in behavior. Families and caregivers should be advised of the need for close observation and communication with the prescriber. ABILIFY is not approved for use in pediatric patients with depression [see Warnings and Precautions].

**INDICATIONS AND USAGE: Schizophrenia** - ABILIFY is indicated for acute and maintenance treatment of Schizophrenia in adolescents 13 to 17 years of age [see Clinical Studies (14.1) in Full Prescribing Information].

**Bipolar Disorder** - ABILIFY is indicated for acute and maintenance treatment of manic and mixed episodes associated with Bipolar I Disorder with or without psychotic features in pediatric patients 10 to 17 years of age [see Clinical Studies (14.2) in Full Prescribing Information].

**CONTRAINDICATIONS:** Known hypersensitivity reaction to ABILIFY. Reactions have ranged from pruritus/urticaria to anaphylaxis [see Adverse Reactions].

**WARNINGS AND PRECAUTIONS: Use in Elderly Patients with Dementia-Related Psychosis - Increased Mortality: Elderly patients with dementia-related psychosis treated with atypical antipsychotic drugs are at an increased risk of death compared to placebo. ABILIFY is not approved for the treatment of patients with dementia-related psychosis [see Boxed Warning].**

**Cerebrovascular Adverse Events, Including Stroke:** In placebo-controlled clinical studies (two flexible dose and one fixed dose study) of dementia-related psychosis, there was an increased incidence of cerebrovascular adverse events (eg, stroke, transient ischemic attack), including fatalities, in aripiprazole-treated patients (mean age: 84 years; range: 78-88 years). In the fixed-dose study, there was a statistically significant dose response relationship for cerebrovascular adverse events in patients treated with aripiprazole. Aripiprazole is not approved for the treatment of patients with dementia-related psychosis [see also Boxed Warning].

**Safety Experience in Elderly Patients with Psychosis Associated with Alzheimer's Disease:** In three, 10-week, placebo-controlled studies of aripiprazole in elderly patients with psychosis associated with Alzheimer's disease (n=938; mean age: 82.4 years; range: 56-99 years), the treatment-emergent adverse events that were reported at an incidence of ≥3% and aripiprazole incidence at least twice that for placebo were lethargy (placebo 2%, aripiprazole 5%), somnolence (including sedation) (placebo 3%, aripiprazole 8%), and incontinence (primarily urinary incontinence) (placebo 1%, aripiprazole 5%). Excessive salivation (placebo 0%, aripiprazole 4%), and lightheadedness (placebo 1%, aripiprazole 4%). The safety and efficacy of ABILIFY in the treatment of patients with psychosis associated with dementia have not been established. If the prescriber elects to treat such patients with ABILIFY, vigilance should be exercised, particularly for the emergence of difficulty swallowing or excessive salivation, which could predispose to accidental injury or aspiration [see also Boxed Warning].

**Clinical Worsening of Depression and Suicide Risk** - Patients with Major Depressive Disorder (MDD), both adult and pediatric, may experience worsening of their depression and/or the emergence of suicidal ideation and behavior (suicidality) or unusual changes in behavior, whether or not they are taking antidepressant medications, and this risk may persist until significant remission occurs. Suicide is a known risk of depression and certain other psychiatric disorders, and these disorders themselves are the strongest predictors of suicide. There has been a long-standing concern, however, that antidepressants may have a role in inducing worsening of depression and the emergence of suicidality in certain patients during the early phases of treatment. Hoop analysis of short-term placebo-controlled trials of antidepressant drugs (SSRIs and others) showed that these drugs increase the risk of suicidal thinking and behavior (suicidality) in children, adolescents, and young adults (ages 18-24) with Major Depressive Disorder (MDD) and other psychiatric disorders. Short-term studies did not show an increase in the risk of suicidality with antidepressants compared to placebo in adults beyond age 24; there was a reduction with antidepressants compared to placebo in adults aged 65 and older.

The pooled analyses of placebo-controlled trials in children and adolescents with MDD, Obsessive Compulsive Disorder (OCD), or other psychiatric disorders included a total of 24 short-term trials of 9 antidepressant drugs in over 4400 patients. The pooled analyses of placebo-controlled trials in adults with MDD or other psychiatric disorders included a total of 795 short-term trials (median duration of 2 months) of 11 antidepressant drugs in over 77,000 patients. There was considerable variation in risk of suicidality among drugs, but a tendency toward an increase in the younger patients for almost all drugs studied. There were differences in absolute risk of suicidality across the different indications, with the highest incidence in MDD. The risk differences (drug vs placebo), however, were relatively stable within age strata and across indications. These risk differences (drug-placebo difference) in the number of cases of suicidality per 1000 patients treated were reported as: **Increases compared to placebo:** -18 (14 additional cases); 18-24 (5 additional cases); and **Decreases compared to placebo:** 25-64 (1 fewer case); ≥65 (6 fewer cases). No suicides occurred in any of the pediatric trials. There were suicides in the adult trials, but the number was not sufficient to reach any conclusion about drug effect on suicide. It is unknown whether the suicidality risk extends to longer-term use, ie, beyond several months. However, there is substantial evidence from placebo-controlled maintenance trials in adults with depression that the use of antidepressants can delay the recurrence of depression.

All patients being treated with antidepressants for any indication should be monitored appropriately and observed closely for clinical worsening, suicidality, and unusual changes in behavior, especially during the initial few months of a course of drug therapy, or at times of dose changes, either increases or decreases.

The following symptoms, anxiety, agitation, panic attacks, insomnia, irritability, hostility, aggressiveness, impulsivity, akathisia (psychomotor restlessness), hypomania, and mania, have been reported in adult and pediatric patients being treated with antidepressants for Major Depressive Disorder as well as for other indications, both psychiatric and nonpsychiatric. Although a causal link between the emergence of such symptoms and either the worsening of depression and/or the emergence of suicidal impulses has not been established, there is concern that such symptoms may represent precursors to emerging suicidality.

Consideration should be given to changing the therapeutic regimen, including possibly discontinuing the medication, in patients whose depression is persistently worse, or who are experiencing emergent suicidality or symptoms that might be precursors to worsening depression or suicidality, especially if these symptoms are severe, abrupt in onset, or were not part of the patient's presenting symptoms.

Families and caregivers of patients being treated with antidepressants for Major Depressive Disorder or other indications, both psychiatric and nonpsychiatric, should be alerted about the need to monitor patients for the emergence of agitation, irritability, unusual changes in behavior, and the other symptoms described above, as well as the emergence of suicidality, and to report such symptoms immediately to healthcare providers. Such monitoring should include daily observation by families and caregivers. Prescriptions for ABILIFY should be written for the smallest quantity of tablets consistent with good patient management, in order to reduce the risk of overdose.

**Screening Patients for Bipolar Disorder:** A major depressive episode may be the initial presentation of Bipolar Disorder. It is generally believed (though not established in controlled trials) that treating such an episode with an antidepressant alone may increase the likelihood of precipitation of a manic/psychotic episode in patients at risk for Bipolar Disorder. Whether any of the symptoms described above represent such a warning is unknown. However, prior to initiating treatment with an antidepressant, patients with depressive symptoms should be adequately screened to determine if they are at risk for Bipolar Disorder, such screening should include a detailed psychiatric history (including a family history of suicide, Bipolar Disorder, and depression) and be noted that ABILIFY is not approved for use in treating depression in the pediatric population.

**Neuroleptic Malignant Syndrome (NMS)** - A potentially fatal symptom complex sometimes referred to as Neuroleptic Malignant Syndrome (NMS) may occur with administration of antipsychotic drugs, including aripiprazole. Rare cases of NMS occurred during aripiprazole treatment in the worldwide clinical database. Clinical manifestations of NMS are hyperreflexia, muscle rigidity, altered mental status, and evidence of autonomic instability (irregular pulse or blood pressure, tachycardia, diaphoresis, and cardiac dysrhythmias). Additional signs may include elevated creatine phosphokinase, myoglobinuria (myoglobinemia), and acute renal failure.

The diagnostic evaluation of patients with the syndrome is complicated. In arriving at a diagnosis, it is important to consider cases where the clinical presentation includes both serious medical illness (eg, pneumonia, systemic infection) and untreated or inadequately treated extrapyramidal signs and symptoms (EPS). Other important considerations include the differential diagnosis, including central anticholinergic toxicity, heat stroke, drug fever, and primary central nervous system pathology.

The management of NMS should include: 1) immediate discontinuation of antipsychotic drugs and other drugs not essential to concurrent therapy; 2) intensive symptomatic treatment and medical monitoring; and 3) treatment of any concomitant serious medical problems for which specific treatments are available. There is no general agreement about specific pharmacological treatment regimens for uncomplicated NMS. If a patient requires antipsychotic drug treatment after recovery from NMS, the potential reinduction of drug therapy should be carefully considered. The patient should be carefully monitored since recurrences of NMS have been reported.

**Tardive Dyskinesia** - A syndrome of potentially irreversible, involuntary, dyskinetic movements may develop in patients treated with antipsychotic drugs. Although the prevalence of the syndrome appears to be highest among the elderly, especially elderly women, it is impossible to rely upon

prevalence estimates to predict, at the inception of antipsychotic treatment, which patients are likely to develop the syndrome. Whether antipsychotic drug products differ in their potential to cause tardive dyskinesia is unknown.

The risk of developing tardive dyskinesia and the likelihood that it will become irreversible are believed to increase as the duration of treatment and the total cumulative dose of antipsychotic drugs administered to the patient increase. However, the syndrome can develop, although much less commonly, after relatively brief treatment periods at low doses. There is no known treatment for established cases of tardive dyskinesia, although the syndrome may remit, partially or completely, if antipsychotic treatment is withdrawn. Antipsychotic treatment, itself, however, may suppress (or partially suppress) the signs and symptoms of the syndrome and, thereby, may possibly mask the underlying process. The effect that symptomatic suppression has upon the long-term course of the syndrome is unknown.

Given these considerations, ABILIFY (aripiprazole) should be prescribed in a manner that is most likely to minimize the occurrence of tardive dyskinesia. Chronic antipsychotic treatment should generally be reserved for patients who suffer from a chronic illness that (1) is known to respond to antipsychotic drugs and (2) for whom alternative, equally effective, but potentially less harmful treatments are not available or appropriate. In patients who do require chronic treatment, the smallest dose and the shortest duration of treatment producing a satisfactory clinical response should be sought. The need for continued treatment should be reassessed periodically. If signs and symptoms of tardive dyskinesia appear in a patient on ABILIFY drug discontinuation should be considered. However, some patients may require treatment with ABILIFY despite the presence of the syndrome.

**Hyperglycemia and Diabetes Mellitus** - Hyperglycemia, in some cases extreme and associated with ketoacidosis or hyperosmolar coma or death, has been reported in patients treated with atypical antipsychotics. There have been few reports of hyperglycemia in patients treated with ABILIFY (see Adverse Reactions). Although fewer patients have been treated with ABILIFY, it is not known if this more limited experience is the sole reason for the paucity of such reports. Assessment of the relationship between atypical antipsychotic use and glucose abnormalities is complicated by the possibility of an increased background risk of diabetes mellitus in patients with Schizophrenia and the increasing incidence of diabetes mellitus in the general population. Given these confounders, the relationship between atypical antipsychotic use and hyperglycemia-related adverse events is not completely understood. However, epidemiological studies which did not include ABILIFY suggest an increased risk of treatment-emergent hyperglycemia-related adverse events in patients treated with the atypical antipsychotics included in these studies. Because ABILIFY was not marketed at the time these studies were performed, it is not known if ABILIFY is associated with this increased risk. Precise risk estimates for hyperglycemia-related adverse events in patients treated with atypical antipsychotics are not available.

Patients with an established diagnosis of diabetes mellitus who are started on atypical antipsychotics should be monitored regularly for worsening of glucose control. Patients with risk factors for diabetes mellitus (eg, obesity, family history of diabetes) who are starting treatment with atypical antipsychotics should undergo fasting blood glucose testing at the beginning of treatment and periodically during treatment. Any patient treated with atypical antipsychotics should be monitored for symptoms of hyperglycemia including polydipsia, polyuria, polyphagia, and weakness. Patients who develop symptoms of hyperglycemia during treatment with atypical antipsychotics should undergo fasting blood glucose testing. In some cases, hyperglycemia has resolved when the atypical antipsychotic was discontinued; however, some patients require continuation of anti-diabetic treatment despite discontinuation of the suspect drug.

**Orthostatic Hypotension** - Aripiprazole may cause orthostatic hypotension, perhaps due to its  $\alpha_1$ -adrenergic receptor antagonism. The incidence of orthostatic hypotension-associated events (in short-term, placebo-controlled trials of pediatric patients 10 to 17 years of age (n=399) on oral ABILIFY included (orthostatic hypotension 1% (0%), postural dizziness 0.5% (0%), and syncope 0.3% (0%)). The incidence of a significant orthostatic change in blood pressure (defined as a decrease in systolic blood pressure  $\geq 20$  mmHg accompanied by an increase in heart rate  $\geq 20$  when comparing standing to supine values) for aripiprazole was not meaningfully different from placebo (aripiprazole incidence, placebo incidence); in pediatric oral aripiprazole-treated patients aged 10 to 17 years (0%, 0.5%). Aripiprazole should be used with caution in patients with known cardiovascular disease (history of myocardial infarction or ischemic heart disease, heart failure or conduction abnormalities), cerebrovascular disease, or conditions which may predispose patients to hypotension (dehydration, hypovolemia, and treatment with antihypertensive medications).

**Seizures/Convulsions** - In short-term, placebo-controlled trials, seizures/convulsions occurred in 0.3% (1/399) of pediatric patients (10 to 17 years) who were on atypical antipsychotic drugs. Aripiprazole should be used cautiously in patients with a history of seizures or with conditions that lower the seizure threshold, eg, Alzheimer's dementia. Conditions that lower the seizure threshold may be more prevalent in a population of 65 years or older.

**Potential for Cognitive and Motor Impairment** - ABILIFY, like other antipsychotics, may have the potential to impair judgment, thinking, or motor skills. For example, in short-term, placebo-controlled trials, somnolence (including sedation) was reported as follows (aripiprazole incidence, placebo incidence): in pediatric patients aged 10 to 17 (21%, 5%). Somnolence (including sedation) led to discontinuation in 1% (4/292) of pediatric patients (10 to 17 years) on oral ABILIFY in short-term, placebo-controlled trials. Despite the relatively modest increased incidence of these events compared to placebo, patients should be cautioned about operating hazardous machinery, including automobiles, until they are reasonably certain that therapy with ABILIFY does not affect them adversely.

**Body Temperature Regulation** - Disruption of the body's ability to reduce core body temperature has been attributed to antipsychotic agents. Appropriate care is advised when prescribing aripiprazole for patients who will be experiencing conditions which may contribute to an elevation in core body temperature (eg, exercising strenuously, exposure to extreme heat, receiving concomitant treatment with anticholinergic activity, or being subject to dehydration) [see Adverse Reactions].

**Suicide** - The possibility of a suicide attempt is inherent in psychotic illnesses. Bipolar Disorder, and Major Depressive Disorder, and close supervision of high-risk patients should accompany drug therapy. Prescriptions for ABILIFY should be written for the smallest quantity consistent with good patient management in order to reduce the risk of overdose [see Adverse Reactions].

**Dysphagia** - Esophageal dysmotility and aspiration have been associated with antipsychotic drug use, including ABILIFY. Aspiration pneumonia is a common cause of morbidity and mortality in elderly patients, in particular those with advanced Alzheimer's dementia. Aripiprazole and other antipsychotic drugs should be used cautiously in patients at risk for aspiration pneumonia [see Warnings and Precautions and Adverse Reactions].

**Use in Patients with Concomitant Illness** - Clinical experience with ABILIFY in patients with certain concomitant systemic illnesses is limited [see Use in Specific Populations]. ABILIFY has not been evaluated or used to any appreciable extent in patients with a recent history of myocardial infarction or unstable heart disease. Patients with these diagnoses were excluded from premarketing clinical studies [see Warnings and Precautions].

**ADVERSE REACTIONS: Overall Adverse Reactions Profile** - The following are discussed in more detail in other sections of the labeling [see **Warnings and Precautions** and **Precautions**]. Use in Elderly Patients with Dementia-Related Psychosis; Clinical Worsening of Depression and Suicide Risk; Neuroleptic Malignant Syndrome (NMS); Tardive Dyskinesia; Hyperglycemia and Diabetes Mellitus; Orthostatic Hypotension; Seizures/Convulsions; Potential for Cognitive and Motor Impairment; Body Temperature Regulation; Suicide; Dysphagia; Use in Patients with Concomitant Illness.

The most common adverse reactions in the pediatric clinical trials (≥10%) were somnolence, extrapyramidal disorder, headache, and nausea.

Aripiprazole has been evaluated for safety in 514 patients (10 to 17 years) who participated in multiple-dose, clinical trials in Schizophrenia or Bipolar Mania and who had approximately 205 patient-years of exposure to oral aripiprazole. A total of 278 pediatric patients were treated with oral aripiprazole for at least 180 days. Because clinical trials are conducted under widely varying conditions, adverse reaction rates observed in the clinical trials of a drug cannot be directly compared to rates in the clinical trials of another drug and may not reflect the rates observed in practice.

**Clinical Studies Experience - Pediatric Patients (13 to 17 years) with Schizophrenia:** The following findings are based on one 6-week placebo-controlled trial in which oral aripiprazole was administered in doses ranging from 2 mg/day to 30 mg/day.

**Adverse Reactions Associated with Discontinuation of Treatment:** The incidence of discontinuation due to adverse reactions between aripiprazole-treated and placebo-treated pediatric patients (13 to 17 years) was 5% and 2%, respectively.

**Commonly Observed Adverse Reactions:** Commonly observed adverse reactions associated with the use of aripiprazole in adolescent patients with Schizophrenia ≥5% incidence and at least twice the rate of placebo were: extrapyramidal disorder, somnolence, and tremor.

**Pediatric Patients (10 to 17 years) with Bipolar Mania:** The following findings are based on one 4-week placebo-controlled trial in which oral aripiprazole was administered in doses of 10 mg/day or 30 mg/day.

**Adverse Reactions Associated with Discontinuation of Treatment:** The incidence of discontinuation due to adverse reactions between aripiprazole-treated and placebo-treated pediatric patients (10 to 17 years) was 7% and 2%, respectively.

**Commonly Observed Adverse Reactions:** Commonly observed adverse reactions associated with the use of aripiprazole in pediatric patients with Bipolar Mania ≥5% incidence and at least twice the rate of placebo for ABILIFY vs placebo (aripiprazole n=197, placebo n=57) respectively were: somnolence (23% vs 3%), extrapyramidal disorder (20% vs 4%), fatigue (11% vs 4%), nausea (11% vs 4%), akathisia (10% vs 2%), blurred vision (8% vs 0%), salivary hypersecretion (6% vs 0%), and dizziness (5% vs 1%).

**Less Common Adverse Reactions in Pediatric Patients (10 to 17 years) with Schizophrenia or Bipolar Mania**

The following treatment-emergent reactions reported in pediatric patients at an incidence of ≥1%, rounded to the nearest percent, with aripiprazole (doses  $\geq 2$  mg/day), and at a greater incidence with aripiprazole than with placebo during short-term (up to 6 weeks in Schizophrenia and up to 4 weeks in Bipolar Mania), placebo-controlled trials (aripiprazole n=399, placebo n=197), respectively, were: somnolence (20%, 5%), extrapyramidal disorder (19%, 4%), headache (16%, 13%), nausea (10%, 5%), akathisia (9%, 4%), fatigue (7%, 2%), dizziness (5%, 2%), tremor (5%, 2%), blurred vision (5%), orthostatic hypotension (4%, 3%), increased appetite (4%, 2%), salivary hypersecretion (4%, 1%), pyrexia (3%, 1%), weight increased (2%, 1%), diarrhea (2%, 0%), dry mouth (2%, 1%), rash (2%, 1%), stomach discomfort (2%, 1%), arthralgia (2%, 0%), dystonia (2%, 0%), dyskinesia (1%, 0%), orthostatic hypotension (1%, 0%), and sedation (1%, 0%).

**Dose-Related Adverse Reactions - Schizophrenia:** In the study of pediatric patients (13 to 17 years of age) with Schizophrenia, three common adverse reactions appeared to have a possible dose response relationship: extrapyramidal disorder (incidences were placebo, 5.0%; 10 mg, 13.0%; 30 mg, 21.6%), somnolence (incidences were placebo, 6.0%; 10 mg, 11.0%; 30 mg, 21.6%), and tremor (incidences were placebo, 2.0%; 10 mg, 7.0%; 30 mg, 11.8%). **Bipolar Mania:** In the study of pediatric patients (10 to 17 years of age) with Bipolar Mania, four common adverse reactions had a possible dose response relationship at 1, 10, and 30 mg/day aripiprazole (incidences were placebo, 3.1%; 10 mg, 12.2%; 30 mg, 27.2%). Somnolence (incidences were placebo, 3.1%; 10 mg, 19.4%; 30 mg, 26.3%), akathisia (incidences were placebo, 2.2%; 10 mg, 12.2%; 30 mg, 11.1%) and salivary hypersecretion (incidences were placebo, 0.0%; 10 mg, 3.1%; 30 mg, 8.1%).

**Extrapyramidal Symptoms:** In the short-term, placebo-controlled trial of Schizophrenia in pediatric (13 to 17 years) patients, the incidence of reported EPS-related events, excluding events related to akathisia, for aripiprazole-treated patients was 25% vs. 7% for placebo; and the incidence of akathisia-related events for aripiprazole-treated patients was 9% vs. 6% for placebo. In the short-term, placebo-controlled trial in Bipolar Mania in pediatric (10 to 17 years) patients, the incidence of reported EPS-related events, excluding events related to akathisia, for aripiprazole-treated patients was 26% vs. 5% for placebo and the incidence of akathisia-related events for aripiprazole-treated patients was 10% vs. 2% for placebo. Objectively collected data from three trials was collected on the Simpson Angus Rating Scale for EPS, the Barnes Akathisia Scale (for akathisia), and the Assessments of Involuntary Movement Scales (for dyskinesias). In the pediatric (13 to 17 years) Schizophrenia trial, the objectively collected data did



not show a difference between aripiprazole and placebo, with the exception of the Simpson Angus Rating Scale (aripiprazole, 0.24; placebo, 0.29) in the pediatric (10 to 17 years) short-term Bipolar Mania trial; the Simpson Angus Rating Scale showed a significant difference between aripiprazole and placebo (aripiprazole, 0.30; placebo, 0.05). Changes in the Barnes Akathisia Scale and the Assessments of Involuntary Movement Scales were similar for the aripiprazole and placebo groups.

**Dystonia:** Class Effect: Symptoms of dystonia, prolonged abnormal contractions of muscle groups, may occur in susceptible individuals during the first few days of treatment. Dystonic symptoms include: spasm of the neck muscles, sometimes progressing to tightness of the throat, swallowing difficulty, difficulty breathing, and/or protrusion of the tongue. While these symptoms can occur at low doses, they occur more frequently and with greater severity with high potency and at higher doses of first generation antipsychotic drugs. An elevated risk of acute dystonia is observed in males and younger age groups.

**Laboratory Test Abnormalities:** A between group comparison for 4-week to 6-week, placebo-controlled trials in pediatric patients (10 to 17 years) revealed no medically important differences between the aripiprazole and placebo groups in the proportions of patients experiencing potentially clinically significant changes in routine serum chemistry, hematology, or urinalysis parameters. Similarly, there were no aripiprazole/placebo differences in the incidence of discontinuations for changes in serum chemistry, hematology, or urinalysis in pediatric patients.

**Weight Gain:** In a 6-week trial in pediatric patients (13 to 17 years) with Schizophrenia, there was a slight difference in mean weight gain between aripiprazole and placebo patients (1.0 [13 kg vs. 0.83 kg, respectively] and also a difference in the proportion of patients meeting a weight gain criterion of  $\geq 7\%$  of body weight (aripiprazole 5% compared to placebo 1%).

**Other Adverse Reactions Observed During the Premarketing Evaluation of Aripiprazole:** Following is a list of MedDRA terms that reflect adverse reactions as defined in Adverse Reactions reported by patients treated with oral aripiprazole at multiple doses  $\geq 2$  mg/day during any phase of a trial, within the database of 13,543 adult patients; oral aripiprazole excluding those events already listed as adverse reactions in other parts of Full Prescribing Information, or those considered in Warnings and Precautions. Although the reactions reported occurred during treatment with aripiprazole, they were not necessarily caused by it.

**Pediatric Patients: Oral Administration:** Most adverse events observed in the pooled database of 514 pediatric patients aged 10 to 17 years were also observed in the adult population. Additional adverse reactions observed in the pediatric population are listed below: Gastrointestinal Disorders:  $>1/1000$  patients and  $<1/100$  patients - tongue dry, tongue spasm; Investigations:  $\geq 1/100$  patients - blood insulin increased; Nervous System Disorders:  $\geq 1/1000$  patients and  $<1/100$  patients - sleep talking, Skin and Subcutaneous Tissue Disorders:  $\geq 1/1000$  patients and  $<1/100$  patients - hirsutism.

**Postmarketing Experience:** The following adverse reactions have been identified during post approval use of ABILIFY (aripiprazole). Because these reactions are reported voluntarily from a population of uncertain size, it is not always possible to establish a causal relationship to drug exposure; rare occurrences of allergic reaction (anaphylactic reaction, angioedema, laryngospasm, pruritus/urticaria, or oropharyngeal edema), and blood glucose fluctuation.

**DRUG INTERACTIONS:** Given the primary CNS effects of aripiprazole, caution should be used when ABILIFY is taken in combination with other centrally-acting drugs or alcohol. Due to its alpha adrenergic antagonism, aripiprazole has the potential to interfere with the effect of certain antihypertensive agents.

**Potential for Other Drugs to Affect ABILIFY:** Aripiprazole is not a substrate of CYP1A1, CYP1A2, CYP2A6, CYP2D6, CYP2C8, CYP2C9, CYP2C19, or CYP2E1 enzymes. Aripiprazole also does not undergo direct glucuronidation. This suggests that an interaction of aripiprazole with inhibitors or inducers of these enzymes, or other factors, like smoking, is unlikely.

Both CYP3A4 and CYP2D6 are responsible for aripiprazole metabolism. Agents that inhibit CYP3A4 (eg, carbamazepine) could cause an increase in aripiprazole clearance and lower blood levels. Inhibitors of CYP3A4 (eg, ketoconazole) or CYP2D6 (eg, quinidine, fluoxetine, or paroxetine) can inhibit aripiprazole elimination and cause increased blood levels.

**Ketoconazole and Other CYP3A4 Inhibitors:** Coadministration of ketoconazole (200 mg/day for 14 days) with a 15 mg single dose of aripiprazole increased the AUC of aripiprazole and its active metabolite by 63% and 77%, respectively. The effect of a higher ketoconazole dose (400 mg/day) has not been studied. When ketoconazole is given concomitantly with aripiprazole, the aripiprazole dose should be reduced to one-half of its normal dose. Other strong inhibitors of CYP3A4 (itraconazole) would be expected to have similar effects and need similar dose reductions. Moderate inhibitors (erythromycin, grapefruit juice) have not been studied. When the CYP3A4 inhibitor is withdrawn from the combination therapy, the aripiprazole dose should be increased.

**Quinidine and Other CYP2D6 Inhibitors:** Coadministration of a 10 mg single dose of aripiprazole with quinidine (166 mg/day for 13 days), a potent inhibitor of CYP2D6, increased the AUC of aripiprazole by 112% but decreased the AUC of its active metabolite, dehydro-aripiprazole, by 35%. Aripiprazole dose should be reduced to one-half of its normal dose when quinidine is given concomitantly with aripiprazole. Other significant inhibitors of CYP2D6, such as fluoxetine or paroxetine, would be expected to have similar effects and should lead to similar dose reductions. When the CYP2D6 inhibitor is withdrawn from the combination therapy, the aripiprazole dose should be increased.

**Carbamazepine and Other CYP3A4 Inducers:** Coadministration of carbamazepine (200 mg twice daily), a potent CYP3A4 inducer, with aripiprazole (30 mg daily) resulted in an approximate 70% decrease in  $C_{max}$  and AUC values of both aripiprazole and its active metabolite, dehydro-aripiprazole. When carbamazepine is added to aripiprazole therapy, aripiprazole dose should be doubled. Additional dose increases should be based on clinical evaluation. When carbamazepine is withdrawn from the combination therapy, the aripiprazole dose should be reduced.

**Potential for ABILIFY to Affect Other Drugs:** Aripiprazole is unlikely to cause clinically important pharmacokinetic interactions with drugs metabolized by cytochrome P450 enzymes. In *in vivo* studies, 10 mg/day to 30 mg/day doses of aripiprazole had no significant effect on metabolism by CYP2C6 (dextromethorphan), CYP2C9 (warfarin), CYP2C19 (omeprazole, warfarin), and CYP3A4 (dextromethorphan substrates). Additionally, aripiprazole and dehydro-aripiprazole did not show potential for altering CYP1A2-mediated metabolism *in vitro*. No effect of aripiprazole was seen on the pharmacokinetics of lithium or valproate.

**Alcohol:** There was no significant difference between aripiprazole coadministered with ethanol and placebo coadministered with ethanol on performance of gross motor skills or stimulus response in healthy subjects. As with most psychoactive medications, patients should be advised to avoid alcohol while taking ABILIFY.

**Drugs Having No Clinically Important Interactions with ABILIFY - Famotidine:** Coadministration of aripiprazole (given in a single dose of 15 mg with a 40 mg single dose of the H<sub>2</sub> antagonist famotidine, a potent gastric acid blocker, decreased the solubility of aripiprazole and, hence, its rate of absorption, reducing by 37% and 21% the  $C_{max}$  of aripiprazole and dehydro-aripiprazole, respectively, and by 13% and 15%, respectively, the extent of absorption (AUC). No dosage adjustment of aripiprazole is required when administered concomitantly with famotidine.

**Valproate:** When valproate (500 mg/day-1500 mg/day) and aripiprazole (30 mg/day) were coadministered, at steady-state the  $C_{max}$  and AUC of aripiprazole were decreased by 25%. No dosage adjustment of aripiprazole is required when administered concomitantly with valproate. When aripiprazole (30 mg/day) and valproate (1000 mg/day) were coadministered, at steady-state there were no clinically significant changes in the  $C_{max}$  or AUC of valproate. No dosage adjustment of valproate is required when administered concomitantly with aripiprazole.

**Lithium:** A pharmacokinetic interaction of aripiprazole with lithium is unlikely because lithium is not bound to plasma proteins, is not metabolized, and is almost entirely excreted unchanged in urine. Coadministration of therapeutic doses of lithium (1200 mg/day-1800 mg/day) for 21 days with aripiprazole (30 mg/day) did not result in clinically significant changes in the pharmacokinetics of aripiprazole or its active metabolite, dehydro-aripiprazole ( $C_{max}$  and AUC increased by less than 20%). No dosage adjustment of aripiprazole is required when administered concomitantly with lithium. Coadministration of aripiprazole (30 mg/day) with lithium (600 mg/day) did not result in clinically significant changes in the pharmacokinetics of lithium. No dosage adjustment of lithium is required when administered concomitantly with aripiprazole.

**Lamotrigine:** Coadministration of 10 mg/day to 30 mg/day oral doses of aripiprazole for 14 days to patients with Bipolar I Disorder had no effect on the steady-state pharmacokinetics of 100 mg/day to 400 mg/day lamotrigine, a UDP-glucosyltransferase 1A4 substrate. No dosage adjustment of lamotrigine is required when aripiprazole is added to lamotrigine.

**Dextromethorphan:** Aripiprazole at doses of 10 mg/day to 30 mg/day for 14 days had no effect on dextromethorphan's O-desalkylation to its major metabolite, dextrorphan, a pathway dependent on CYP2D6 activity. Aripiprazole also had no effect on dextromethorphan's N-demethylation to its metabolite, 3-methoxymorphinan, a pathway dependent on CYP3A4 activity. No dosage adjustment of dextromethorphan is required when administered concomitantly with aripiprazole.

**Warfarin:** Aripiprazole (10 mg/day for 14 days) had no effect on the pharmacokinetics of R-warfarin and S-warfarin or on the pharmacodynamic end point of international normalized ratio, indicating the lack of a clinically relevant effect of aripiprazole on CYP2C9 and CYP2C19 metabolism or the binding of highly protein-bound warfarin. No dosage adjustment of warfarin is required when administered concomitantly with aripiprazole.

**Omeprazole:** Aripiprazole (10 mg/day for 15 days) had no effect on the pharmacokinetics of a single 20 mg dose of omeprazole, a CYP2C19 substrate, in healthy subjects. No dosage adjustment of omeprazole is required when administered concomitantly with aripiprazole.

**Lorazepam:** Coadministration of lorazepam injection (2 mg) and aripiprazole injection (15 mg) to healthy subjects (n=40; 35 males and 5 females; ages 19-45 years old) did not result in clinically important changes in the pharmacokinetics of either drug. No dosage adjustment of aripiprazole is required when administered concomitantly with lorazepam. However, the intensity of sedation was greater with the combination as compared to that observed with aripiprazole alone and the orthostatic hypotension observed was greater with the combination as compared to that observed with lorazepam alone (see Warnings and Precautions).

**Escitalopram:** Coadministration of 10 mg/day oral doses of aripiprazole for 14 days to healthy subjects had no effect on the steady-state pharmacokinetics of 10 mg/day escitalopram, a substrate of CYP2C19 and CYP3A4. No dosage adjustment of escitalopram is required when aripiprazole is added to escitalopram.

**Venlafaxine:** Coadministration of 10 mg/day to 20 mg/day oral doses of aripiprazole for 14 days to healthy subjects had no effect on the steady-state pharmacokinetics of venlafaxine and O-desmethylvenlafaxine following 75 mg/day venlafaxine XR, a CYP2D6 substrate. No dosage adjustment of venlafaxine is required when aripiprazole is added to venlafaxine.

**Fluoxetine, Paroxetine, and Sertraline:** A population pharmacokinetic analysis in patients with Major Depressive Disorder showed no substantial change in plasma concentrations of fluoxetine (20 mg/day or 40 mg/day), paroxetine (CR 37.5 mg/day or 50 mg/day), or sertraline (100 mg/day or 150 mg/day) dosed to steady state. The steady-state plasma concentrations of fluoxetine and norfluoxetine increased by about 18% and 36%, respectively and concentrations of paroxetine decreased by about 27%. The steady-state plasma concentrations of sertraline and desmethylsertraline were not substantially changed when these antidepressant therapies were coadministered with aripiprazole. Aripiprazole dosing was 2 mg/day to 15 mg/day when given with fluoxetine or paroxetine or 2 mg/day to 20 mg/day when given with sertraline.

**USE IN SPECIFIC POPULATIONS:** In general, no dosage adjustment for ABILIFY (aripiprazole) is required on the basis of a patient's age, gender, race, smoking status, hepatic function, or renal function (see Dosage and Administration (2.5) in Full Prescribing Information).

**Pregnancy Category C:** There are no adequate and well-controlled studies in pregnant women. Aripiprazole should be used during pregnancy only if the potential benefit outweighs the potential risk to the fetus. In animal studies, aripiprazole demonstrated developmental toxicity including possible teratogenic effects in rats and rabbits.

**Labor and Delivery:** - The effect of aripiprazole on labor and delivery in humans is unknown.

**Nursing Mothers:** - Aripiprazole was present in milk of rats during lactation. It is not known whether aripiprazole or its metabolites are excreted in human milk. It is recommended that women receiving aripiprazole should not breast feed.

**Pediatric Use:** - Safety and effectiveness in pediatric patients with Major Depressive Disorder or agitation associated with Schizophrenia or Bipolar Mania have not been established.

Safety and effectiveness in pediatric patients with Schizophrenia were established in a 6-week, placebo-controlled clinical trial in all pediatric patients aged 13 to 17 years (see Indications and Usage, Dosage and Administration (2.1), in Full Prescribing Information, Adverse Reactions, and Clinical Studies (14.1) in Full Prescribing Information). Although maintenance efficacy in pediatric patients has not been systematically evaluated, maintenance efficacy can be extrapolated from adult data along with comparisons of aripiprazole pharmacokinetic parameters in adult and pediatric patients.

Safety and effectiveness in pediatric patients with Bipolar Mania were established in a 4-week, placebo-controlled clinical trial in 197 pediatric patients aged 10 to 17 years (see Indications and Usage, Dosage and Administration (2.1), in Full Prescribing Information, Adverse Reactions, and Clinical Studies (14.1) in Full Prescribing Information). Although maintenance efficacy in pediatric patients has not been systematically evaluated, maintenance efficacy can be extrapolated from adult data along with comparisons of aripiprazole pharmacokinetic parameters in adult and pediatric patients. The efficacy of adjunctive ABILIFY with concomitant lithium or valproate in the treatment of manic or mixed episodes in pediatric patients has not been systematically evaluated. However, such efficacy and lack of pharmacokinetic interaction between aripiprazole and lithium or valproate can be extrapolated from adult data, along with comparisons of aripiprazole pharmacokinetic parameters in adult and pediatric patients. The pharmacokinetics of aripiprazole and dehydro-aripiprazole in pediatric patients 10 to 17 years of age were similar to those in adults after correcting for the differences in body weights.

**Geriatric Use:** - In formal single-dose pharmacokinetic studies (with aripiprazole given in a single dose of 15 mg), aripiprazole clearance was 20% lower in elderly ( $\geq 65$  years) subjects compared to younger adult subjects (18 to 64 years). Also, the pharmacokinetics of aripiprazole after multiple doses in elderly patients appeared similar to that observed in young, healthy subjects. No dosage adjustment is recommended for elderly patients (see also Warnings and Precautions).

Of the 13,543 patients treated with oral aripiprazole in clinical trials, 1073 (8%) were  $\geq 65$  years old and 799 (6%) were  $\geq 75$  years old. The majority (81%) of the 1073 patients were diagnosed with Dementia of the Alzheimer's type.

Placebo-controlled studies of oral aripiprazole in Schizophrenia or Bipolar Mania did not include sufficient numbers of subjects aged 65 and over to determine whether they respond differently from younger subjects.

Of the 743 patients treated with aripiprazole injection in clinical trials, 99 (13%) were  $\geq 65$  years old and 78 (10%) were  $\geq 75$  years old. Placebo-controlled studies of aripiprazole injection in patients with Schizophrenia or Bipolar Mania did not include sufficient numbers of subjects aged 65 and over to determine whether they respond differently from younger subjects.

**Renal Impairment:** - In patients with severe renal impairment (creatinine clearance  $<30$  mL/min),  $C_{max}$  of aripiprazole (given in a single dose of 15 mg) and dehydro-aripiprazole increased by 36% and 53%, respectively, but AUC was 15% lower for aripiprazole and 7% higher for dehydro-aripiprazole. Renal excretion of both unchanged aripiprazole and dehydro-aripiprazole is less than 1% of the dose. No dosage adjustment is required in subjects with renal impairment.

**Hepatic Impairment:** - In a single-dose study (15 mg of aripiprazole) in subjects with varying degrees of liver cirrhosis (Child-Pugh Classes A, B, and C), the AUC of aripiprazole, compared to healthy subjects, increased 21% in mild HL, increased 8% in moderate HL, and decreased 25% in severe HL. None of these differences would require dose adjustment.

**Gender:** -  $C_{max}$  and AUC of aripiprazole and its active metabolite, dehydro-aripiprazole, are 30% to 40% higher in women than in men, and correspondingly, the apparent oral clearance of aripiprazole is lower in women. These differences, however, are largely explained by differences in body weight ( $\approx 15\%$ ) between men and women. No dosage adjustment is recommended based on gender.

**Race:** - In a specific pharmacokinetic study was conducted to investigate the effects of race on the disposition of aripiprazole, population pharmacokinetic evaluation revealed no evidence of clinically significant race-related differences in the pharmacokinetics of aripiprazole. No dosage adjustment is recommended based on race.

**Smoking:** - Based on studies using human liver enzymes *in vitro*, aripiprazole is not a substrate for CYP1A2 and also does not undergo direct glucuronidation. Smoking status, therefore, not have an effect on the pharmacokinetics of aripiprazole. Consistent with these *in vitro* results, population pharmacokinetic evaluation did not reveal any significant pharmacokinetic differences between smokers and nonsmokers. No dosage adjustment is recommended based on smoking status.

**DRUG ABUSE AND DEPENDENCE:** ABILIFY is not a controlled substance.

**Abuse and Dependence:** - Aripiprazole has not been systematically studied in humans for its potential for abuse, tolerance, or physical dependence. While the clinical trials did not reveal any tendency for any drug-seeking behavior, it is not possible to predict on the basis of the limited experience the extent to which a CNS-active drug will be misused, diverted, and/or abused once marketed. Patients should be evaluated carefully for a history of drug abuse and closely observed for signs of ABILIFY misuse or abuse.

**OVERDOSSAGE:** 76 cases of deliberate or accidental overdose with oral aripiprazole alone or in combination with other substances were reported worldwide (44 cases with known outcome). 33 recovered without sequelae and one recovered with sequelae (mythiasis and feeling abnormal). Additionally, 10 of these cases were in children (age 12 and younger) involving oral aripiprazole ingestions up to 196 mg with no fatalities. The largest known acute ingestion was 1080 mg of oral aripiprazole (36 times maximum recommended daily doses) in a patient who fully recovered. Common adverse events reported in at least 5% of all overdose cases were vomiting, somnolence, and tremor. For more information on symptoms of overdose, see Full Prescribing Information.

**Management of Overdose:** - No specific information is available on the treatment of overdose with aripiprazole. An electrocardiogram should be obtained in case of overdose and if QT interval (prolonged or present), cardiac monitoring should be instituted. Otherwise, management of overdose should consist of supportive therapy (maintaining an adequate airway, oxygenation and ventilation, and management of symptoms). Close medical supervision and monitoring should continue until the patient recovers. **Charcoal:** In the event of an overdose of ABILIFY, an early charcoal administration may be useful in partially preventing the absorption of aripiprazole. Administration of 50 g of activated charcoal, one hour after a single 15 mg oral dose of aripiprazole, decreased the mean AUC and  $C_{max}$  of aripiprazole by 50%. **Hemodialysis:** Although there is no information on the effect of hemodialysis in treating an overdose with aripiprazole, hemodialysis is unlikely to be useful in overdose management since aripiprazole is highly bound to plasma proteins.

**PATIENT COUNSELING INFORMATION:** Information for Patients, Physicians are advised to discuss the following issues with patients for whom they prescribe ABILIFY. (See Medication Guide (17) in Full Prescribing Information).

**Increased Mortality in Elderly Patients with Dementia-Related Psychosis:** - Advise patients and caregivers of increased risk of death (see Warnings and Precautions).

**Clinical Worsening of Depression and Suicide Risk:** - Alert families and caregivers of patients to monitor for the emergence of agitation, irritability, unusual changes in behavior, suicidality, and other symptoms as described in Warnings and Precautions and to report such symptoms immediately. Advise patients and their families and caregivers to read the Medication Guide and assist them in understanding its contents (see Warnings and Precautions).

**Interference with Cognitive and Motor Performance:** - Because aripiprazole may have the potential to impair judgment, thinking, or motor skills, patients should be cautioned about operating hazardous machinery, including automobiles, until they are reasonably certain that aripiprazole therapy does not affect them adversely (see Warnings and Precautions).

**Pregnancy:** - Patients should be advised to notify their physician if they become pregnant or intend to become pregnant during therapy with ABILIFY (see Use in Specific Populations).

**Nursing:** - Patients should be advised not to breast-feed an infant if they are taking ABILIFY (see Use in Specific Populations).

**Concomitant Medication:** - Patients should be advised to inform their physicians if they are taking, or plan to take, any prescription or over-the-counter drugs, since there is a potential for interactions (see Drug Interactions).

**Alcohol:** - Patients should be advised to avoid alcohol while taking ABILIFY (see Drug Interactions).

**Heat Exposure and Dehydration:** - Patients should be advised regarding appropriate care in avoiding overheating and dehydration (see Warnings and Precautions).

**Sugar Content:** - Patients should be advised that each mL of ABILIFY Oral Solution contains 400 mg of sucrose and 200 mg of fructose.

**Phenylethanolamine:** - Phenylethanolamine is a component of aspartame. Each ABILIFY DISC-MELT O orally Disintegrating Tablet contains the following amounts: 10 mg - 1.12 mg phenylethanolamine and 15 mg - 1.68 mg phenylethanolamine. Tablets manufactured by Otsuka Pharmaceutical Co., Ltd. (Osaka, 101-8535 Japan) or Bristol-Myers Squibb Company, Princeton, NJ 08543 USA. Orally Disintegrating Tablets, Oral Solution, and injection manufactured by Bristol-Myers Squibb Company, Princeton, NJ 08543 USA. Distributed and marketed by Otsuka America Pharmaceutical, Inc., Rockville, MD 20850 USA. Marketed by Bristol-Myers Squibb Company, Princeton, NJ 08543 USA. US Patent Nos. 5,006,528; 6,977,257 and 7,115,567.

 **Bristol-Myers Squibb**  **Otsuka America Pharmaceutical, Inc.**  
Based on 1239550A2, 0308L-1050A 5700508P0300101 0308L-1148 Rev. May 2008  
© 2008, Otsuka Pharmaceutical Co., Ltd. Tokyo, 101-8535 Japan



# IMPORTANT SAFETY INFORMATION and INDICATIONS for ABILIFY® (aripiprazole)

## INDICATIONS

ABILIFY® (aripiprazole) is indicated for:

- Acute and maintenance treatment of manic and mixed episodes associated with Bipolar I Disorder with or without psychotic features in pediatric patients 10 to 17 years of age
- Adjunctive therapy to either lithium or valproate for the acute treatment of manic and mixed episodes associated with Bipolar I Disorder with or without psychotic features in pediatric patients 10 to 17 years of age
- Acute and maintenance treatment of Schizophrenia in adolescents 13 to 17 years of age

## IMPORTANT SAFETY INFORMATION

### WARNINGS: Increased Mortality in Elderly Patients with Dementia-Related Psychosis and Suicidality and Antidepressant Drugs

See Full Prescribing Information for complete boxed warning

Elderly patients with dementia-related psychosis treated with atypical antipsychotic drugs are at an increased risk (1.6 to 1.7 times) of death compared to placebo (4.5% vs 2.6%, respectively). Although the causes of death were varied, most of the deaths appeared to be cardiovascular (eg, heart failure, sudden death) or infectious (eg, pneumonia) in nature. ABILIFY is not approved for the treatment of patients with dementia-related psychosis.

Antidepressants increased the risk compared to placebo of suicidal thinking and behavior (suicidality) in children, adolescents, and young adults in short-term studies of Major Depressive Disorder (MDD) and other psychiatric disorders. Anyone considering the use of adjunctive ABILIFY or another antidepressant in a child, adolescent, or young adult must balance this risk with the clinical need. Short-term studies did not show an increased risk of suicidality in adults beyond age 24. Depression and certain other psychiatric disorders are themselves associated with increases in the risk of suicide. Patients of all ages who are started on antidepressant therapy should be monitored appropriately and observed closely for clinical worsening, suicidality, or unusual changes in behavior. Families and caregivers should be advised of the need for close observation and communication with the prescriber. ABILIFY is not approved for use in pediatric patients with depression.

**Contraindication**—Known hypersensitivity reaction to ABILIFY. Reactions have ranged from pruritus/urticaria to anaphylaxis.

- **Cerebrovascular Adverse Events, Including Stroke**—Increased incidence of cerebrovascular adverse events (eg, stroke, transient ischemic attack), including fatalities, have been reported in clinical trials of elderly patients with dementia-related psychosis treated with ABILIFY.
- **Neuroleptic Malignant Syndrome (NMS)**—As with all antipsychotic medications, a rare and potentially fatal condition known as NMS has been reported with ABILIFY. NMS can cause hyperpyrexia, muscle rigidity, diaphoresis, tachycardia, irregular pulse or blood pressure, cardiac dysrhythmia, and altered mental status. If signs and symptoms appear, immediate discontinuation is recommended.
- **Tardive Dyskinesia (TD)**—The risk of developing TD and the potential for it to become irreversible may increase as the duration of treatment and the total cumulative dose increase. Prescribing should be consistent with the need to minimize TD. If signs and symptoms appear, discontinuation should be considered since TD may remit, partially or completely.
- **Hyperglycemia and Diabetes Mellitus**—Hyperglycemia, in some cases associated with ketoacidosis, coma, or death, has been reported in patients treated with atypical antipsychotics including ABILIFY. Patients with diabetes should be monitored for worsening of glucose control; those with risk factors for diabetes should undergo baseline and periodic fasting blood glucose testing. Patients who develop symptoms of hyperglycemia should also undergo fasting blood glucose testing. There have been few reports of hyperglycemia with ABILIFY.

**Orthostatic Hypotension**—ABILIFY may be associated with orthostatic hypotension and should be used with caution in patients with known cardiovascular disease, cerebrovascular disease, or conditions which would predispose them to hypotension.

**Seizures/Convulsions**—As with other antipsychotic drugs, ABILIFY should be used with caution in patients with a history of seizures or with conditions that lower the seizure threshold.

**Potential for Cognitive and Motor Impairment**—Like other antipsychotics, ABILIFY may have the potential to impair judgment, thinking, or motor skills. Patients should not drive or operate hazardous machinery until they are certain ABILIFY does not affect them adversely.

**Body Temperature Regulation**—Disruption of the body's ability to reduce core body temperature has been attributed to antipsychotics. Appropriate care is advised for patients who may exercise strenuously, be exposed to extreme heat, receive concomitant medication with anticholinergic activity, or be subject to dehydration.

**Suicide**—The possibility of a suicide attempt is inherent in psychotic illnesses, Bipolar Disorder, and Major Depressive Disorder, and close supervision of high-risk patients should accompany drug therapy. Prescriptions should be written for the smallest quantity consistent with good patient management in order to reduce the risk of overdose.

**Dysphagia**—Esophageal dysmotility and aspiration have been associated with antipsychotic drug use, including ABILIFY; use caution in patients at risk for aspiration pneumonia.

Physicians should advise patients to avoid alcohol while taking ABILIFY.

Strong CYP3A4 (eg, ketoconazole) or CYP2D6 (eg, fluoxetine) inhibitors will increase ABILIFY drug concentrations; reduce ABILIFY dose by one-half when used concomitantly, except when used as adjunctive treatment with antidepressants.

CYP3A4 inducers (eg, carbamazepine) will decrease ABILIFY drug concentrations; double ABILIFY dose when used concomitantly.

**Commonly observed adverse reactions** (≥5% incidence and at least twice the rate of placebo for ABILIFY vs placebo, respectively):

- Pediatric patients (10 to 17 years) with Bipolar Mania: somnolence (23% vs 3%), extrapyramidal disorder (20% vs 3%), fatigue (11% vs 4%), nausea (11% vs 4%), akathisia (10% vs 2%), blurred vision (8% vs 0%), salivary hypersecretion (6% vs 0%), and dizziness (5% vs 1%)
- Pediatric patients (13 to 17 years) with Schizophrenia: extrapyramidal disorder (17% vs 5%), somnolence (16% vs 6%), and tremor (7% vs 2%)

Dystonia is a class effect of antipsychotic drugs. Symptoms of dystonia may occur in susceptible individuals during the first days of treatment and at low doses.

## Study Descriptions

### Adolescent Schizophrenia:

Data from a randomized 6-week double-blind, placebo-controlled, multicenter trial assessing the efficacy and safety of two fixed doses of ABILIFY (10 mg/day or 30 mg/day) compared to placebo in adolescent outpatients (13 to 17 years) with schizophrenia (N=302).

### Pediatric Bipolar I Disorder

Data from a randomized 4-week double-blind, placebo-controlled, multicenter trial assessing the efficacy and safety of two fixed doses of ABILIFY (10 mg/day or 30 mg/day) compared to placebo in pediatric outpatients (10 to 17 years) with Bipolar I Disorder (N=296).

Please see BRIEF SUMMARY OF PRESCRIBING INFORMATION, including **Boxed WARNINGS**, for ABILIFY on the adjacent pages.

## References:

1. Data on file, Study 31-03-240. Otsuka America Pharmaceutical, Inc, Rockville, MD.
2. Data on file, Study 31-03-239. Otsuka America Pharmaceutical, Inc, Rockville, MD.

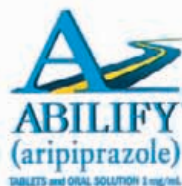

HELP ILLUMINATE THE PERSON WITHIN

Bristol-Myers Squibb Otsuka Otsuka America Pharmaceutical, Inc.

©2008 Otsuka America Pharmaceutical, Inc., Rockville, MD

570US08AB23901

August 2008

0308A-1276

Printed in USA

● Printed on recycled paper.



# Osler Institute 133<sup>rd</sup> to 138<sup>th</sup> Psychiatry Review Courses

approved for AMA/PRA category 1 credit

## for Oral Boards

Optional didactic day & 3-day mock orals

January 12 & 13-15 – San Antonio

March 30 & Mar 31-Apr 2 – Boston

## for Written Exams

March 30-April 3, 2009 – Boston

June 8-12, 2009 – Denver

## for Child and Adolescent

November 10-13 – Philadelphia

April 1-4, 2009 – Boston

*New – Best of Psych Audio*

**Call Today: (800) 356-7537**

**www.osler.org/y8xa**

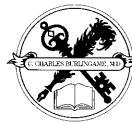

## Call for Nominations

The Institute of Living/Hartford Hospital is pleased to announce that nominations are now being accepted for the 2009 C. Charles Burlingame Award. This award, honoring an outstanding leader in psychiatric education, research or administration, is made in the memory of Dr. Burlingame, psychiatrist-in-chief from 1931 to 1950.

We invite you to nominate a person who has significantly advanced the field of psychiatry. The nomination must include a current curriculum vitae and two letters of support describing the candidate's achievements.

The winner of the Burlingame Award will be notified by February 15, 2009, and invited to present an original paper as the focal point of the award day events. The award, which will be presented at The Institute in the fall of 2009, includes a commemorative certificate and a \$2500 honorarium plus expenses.

The Institute of Living is a comprehensive behavioral health system for the evaluation and treatment of psychiatric and addiction disorders. We offer a full continuum of services to patients and remain committed to the highest standards of clinical care, research and education.

### Past Recipients

|                                      |                                       |
|--------------------------------------|---------------------------------------|
| 1988 Robert Kellner, M.D., Ph.D.     | 1999 Nancy C. Andreasen, M.D., Ph.D.  |
| 1989 William T. Carpenter, Jr., M.D. | 2000 Lewis L. Judd, M.D.              |
| 1990 Dennis P. Cantwell, M.D.        | 2001 Paul S. Appelbaum, M.D.          |
| 1991 George E. Vaillant, M.D.        | 2002 Charles B. Nemeroff, M.D., Ph.D. |
| 1992 A. John Rush, M.D.              | 2003 Dilip V. Jeste, M.D.             |
| 1993 John C. Nemiah, M.D.            | 2004 David H. Barlow, Ph.D.           |
| 1994 Maurice J. Martin, M.D.         | 2005 Herbert D. Kleber, M.D.          |
| 1995 Otto F. Kernberg, M.D.          | 2006 Daniel N. Stern, M.D.            |
| 1996 Charles P. O'Brien, M.D., Ph.D. | 2007 Jerrold F. Rosenbaum, M.D.       |
| 1997 Glen Owen Gabbard, M.D.         | 2008 K. Ranga Rama Krishnan, M.D.     |
| 1998 Lissy F. Jarvik, M.D., Ph.D.    |                                       |

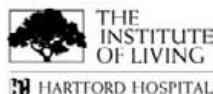

Nominations should be sent no later than January 15, 2009 to:

Harold I. Schwartz, M.D.  
Psychiatrist-in-Chief and Vice-President,  
Behavioral Health  
The Institute of Living/Hartford Hospital  
200 Retreat Avenue  
Hartford, CT 06106

# NEW YORK CITY

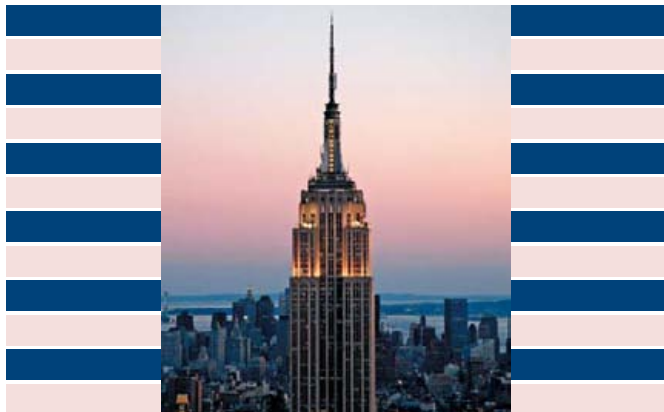

OCTOBER 8-11, 2009

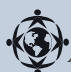

## 61st Institute on Psychiatric Services

APA's Leading Educational Conference on Public and Community Psychiatry

*Pride and Practice: Bringing Innovation Into Our Treatments*

### CALL FOR PAPERS

| Format                            | Deadline          |
|-----------------------------------|-------------------|
| Industry-Supported Symposia ..... | December 15, 2008 |
| Innovative Programs .....         | December 15, 2008 |
| Posters .....                     | May 18, 2009      |
| Symposia .....                    | December 15, 2008 |
| Workshops .....                   | December 15, 2008 |

Submissions are accepted ONLINE ONLY at [www.psych.org/ips](http://www.psych.org/ips).  
For questions, please call 1-888-357-7924 (toll free) or call 703-907-7300.

American Psychiatric Association

NYU Langone Medical Center

## Acute and Maintenance Treatment of Bipolar Disorder: Expert Perspectives

December 13, 2008 - New York City

### Course Program:

**Evolving Diagnostic Criteria for Bipolar Disorder:  
Differentiating Between Unipolar and Bipolar Mood States**  
*S. Nassir Ghaemi, MD, MPH*

**Structural and Functional Changes in Bipolar Disorder:  
Using Neurobiology Findings as a Basis for Diagnosis  
and Treatment** - *P. Murali Doraiswamy, MD*

**Cognitive Dysfunction in Bipolar Disorder: An Overlooked  
Therapeutic Dimension** - *Joseph L. Goldberg, MD*

**Lithium and the Anticonvulsant Mood Stabilizers:  
Which to Use, and When** - *Joseph L. Goldberg, MD*

**Pharmacologic Profiles of the New Generation  
Antipsychotics: Empirical Evidence for FDA-Approved  
Indications** - *J. Craig Nelson, MD*

**Panel Discussion: Optimal Management of  
Acute States and Prevention of Recurrence**  
*Moderator: Jerrold F. Rosenbaum, MD*

### Accreditation and Fees:

3.75 AMA PRA Category 1 Credits™  
Full Fee - Physicians: \$95 Reduced Fee: \$75

Register online at: [www.med.nyu.edu/courses/cme/bipolar](http://www.med.nyu.edu/courses/cme/bipolar)  
Phone: (212) 263-5295 Fax: (212) 263-5293

Sponsored by the NYU Post-Graduate Medical School

# Some battles begin after the war.

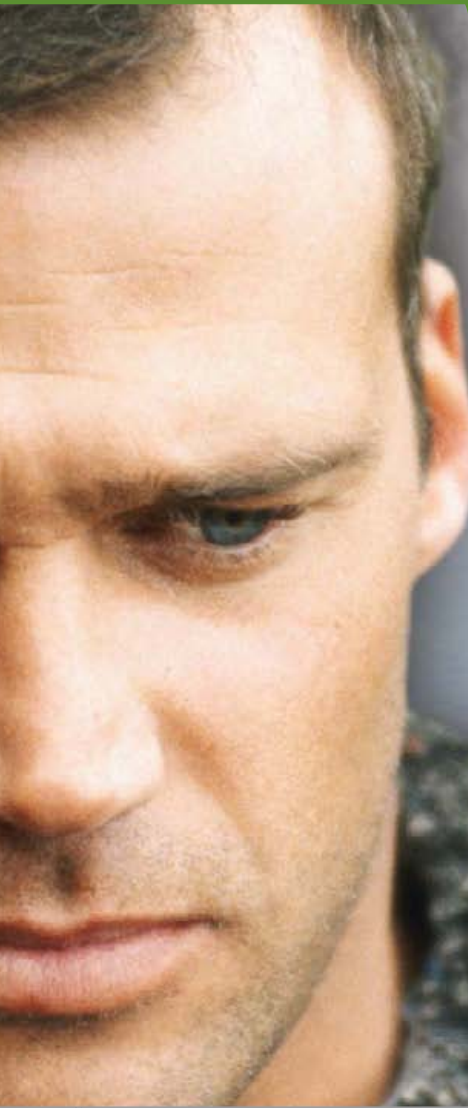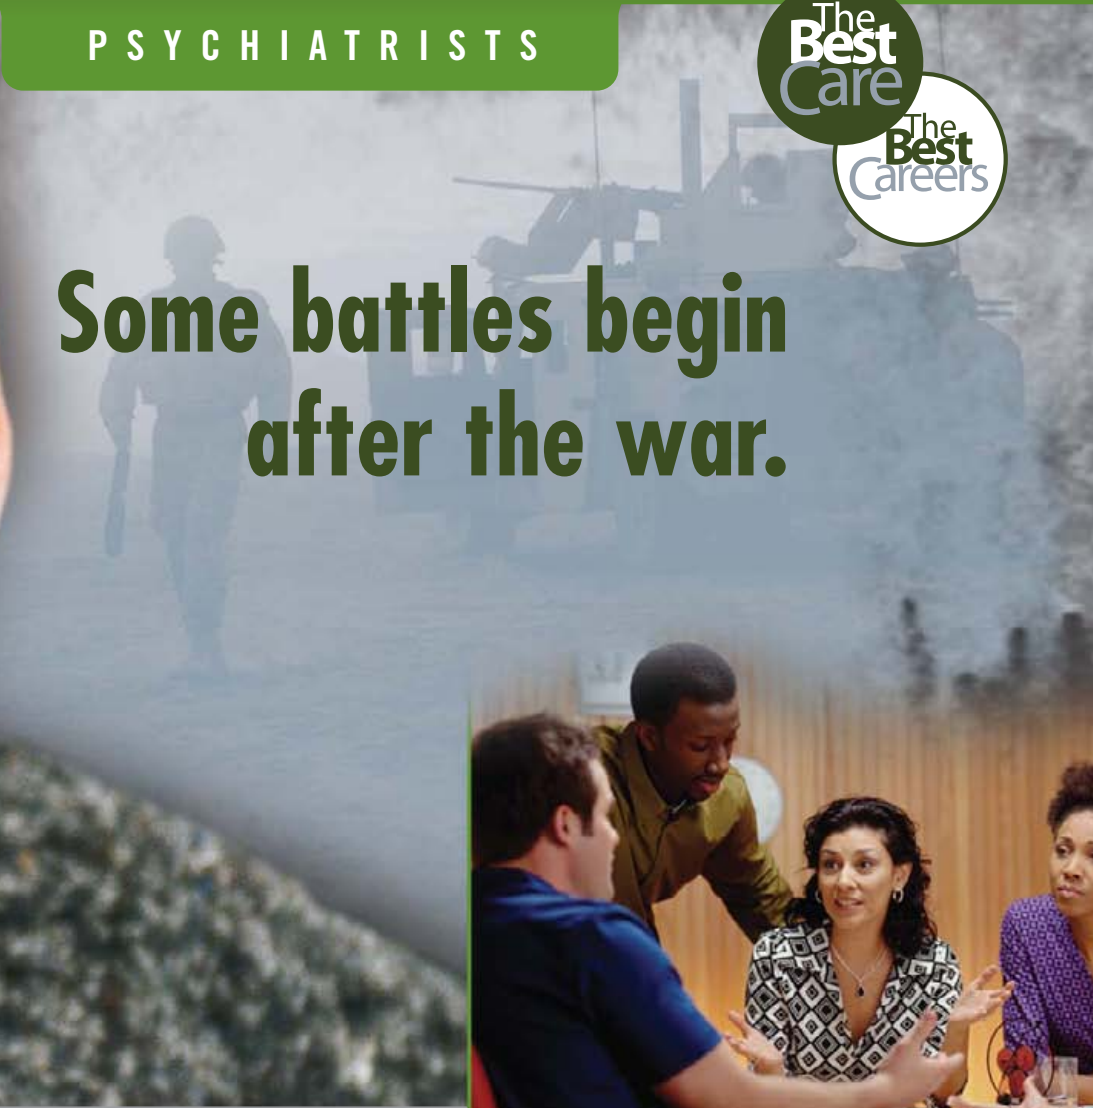

## *Practice innovative psychiatry in a world class health care system.*

As a VA psychiatrist, you'll be part of an interdisciplinary care team driven to develop innovative approaches to mental health care. You'll translate scientific evidence into daily practice as you tackle one of today's most timely issues – helping America's veterans reclaim their mental health once they've returned from battle.

- VA's practice model is based on care needs, not insurance company regulations
- Diverse professional opportunities – clinical, leadership, research, education, and national policy development
- Computerized patient records
- Your state license allows you to practice at any VA facility, anywhere in the country
- Pay close to local labor market/community pay
- Paid medical liability coverage
- Predictable scheduling
- Excellent health and retirement benefits
- Opportunities for education debt reduction
- Extensive opportunities for continuing education
- 26 days paid vacation accrued annually

*VA is committed to hiring veterans*



University of California  
San Francisco

**UCSF**

School of Medicine  
Fresno Medical Education Program

**FRESNO PSYCHIATRY  
FACULTY POSITION**

The University of California San Francisco-Fresno Medical Education Program (UCSF Fresno) and Central California Faculty Medical Group (CCFMG) are seeking candidates for a 1.0 FTE faculty position at the Community Regional Medical Center (CRMC) in Fresno.

The faculty member will provide clinical services on the Psychiatry Consultation-Liaison Service at CRMC. CRMC is the major teaching hospital of UCSF Fresno and contains an ICU, CCU, Trauma Unit, Burn Unit, Rehab Unit and Neurosciences Center. The faculty member will participate in clinical and didactic teaching with residents and medical students.

The Psychiatry Residency Program trains four residents per year in a four-year program. Medical students from UCSF do core and elective rotations at CRMC. Fresno offers a modest cost of living with close proximity to national parks and other recreational activities. Salary and faculty appointment are commensurate with experience.

**Must be Board Certified/Board Eligible**  
**E-mail or FAX CV & 3 references to:**  
CCFMG  
Attn: Diane O'Connor  
FAX: (559) 453-5233  
Diane.Oconnor@ccfmf.org

Visit our website: [www.ccfmg.org](http://www.ccfmg.org) and [www.fresno.ucsf.edu](http://www.fresno.ucsf.edu)

*"UCSF seeks candidates whose expertise, teaching, research, or community service has prepared them to contribute to our commitment to diversity and excellence. UCSF is an affirmative action/equal opportunity employer. The University undertakes affirmative action to assure equal employment opportunity for underutilized minorities and women, for persons with disabilities, and for covered veterans. All qualified applicants are encouraged to apply, including minorities and women."*

 **Liberty Health**  
Jersey City, NJ

*LibertyHealth is an integrated health care delivery system serving Hudson County. We have exciting opportunities to work as an integral member of our interdisciplinary healthcare team at Jersey City Medical Center.*

- **Staff Psychiatrist, F/T**  
No regular mandatory call. Provide leadership to multidisciplinary treatment comprising nurses, social workers, occupational therapists, and internists. Direct patient care on adult inpatient service and medical detoxification unit. Occasional coverage of Consultation Liaison Service. Opportunity to enhance income through voluntary participation in extra service rotation (moonlighting) and teach medical students.
- **Child Psychiatrist, P/T**  
At least 20 hours per week. No regular mandatory call. Provides leadership to multidisciplinary treatment comprising therapists and psychologists. Direct patient care in child and adolescent day programs and outpatient clinics. Direct patient care in adult outpatient program depending on availability.

We offer competitive compensation and benefits package.  
EOE M/F/D/V. Forward resume to Dr. David Schnur,

**Jersey City Medical Center**  
355 Grand St, Jersey City, NJ 07302  
Email: [rchandak@libertyhcs.org](mailto:rchandak@libertyhcs.org)  
Fax 201-369-6301  
[www.libertyhealth.org](http://www.libertyhealth.org)

**PSYCHIATRIC CLINICIANS AND HOSPITALISTS**  
**SCOTT & WHITE HEALTHCARE - CENTRAL TEXAS**

**DEPARTMENT OF MENTAL HEALTH SERVICES**

Scott & White and Texas A&M College of Medicine are seeking outstanding BC/BE individuals for the positions of Psychiatric Clinicians and Hospitalists within the Department of Mental Health Services at our main campus in Temple, TX. Candidates for this position should have strong credentials in clinical care and education, with inpatient psychiatric patient care experience. Academic responsibilities will include opportunities to mentor medical students and residents in basic psychiatric concepts, as well as delivering high quality health care to all population groups.

Led by physicians with a commitment to patient care, education and research, Scott & White is listed among the "Top 100 Hospitals" in America. Scott & White Health System serves as the clinical educational site for The Texas A&M University System Health Science Center College of Medicine.

Scott & White offers a competitive salary and comprehensive benefit package, which begins with four weeks vacation, three weeks CME and a generous retirement plan. For additional information, please call or send your CV to: Kathryn Kotrla, MD, Chair, Department of Mental Health Services, c/o Jason Culp, Physician Recruiter, Scott & White Clinic, 2401 S. 31st, Temple, TX 76508. Phone: (800) 725-3627; email: [jculp@swmail.sw.org](mailto:jculp@swmail.sw.org). A formal application must be completed to be considered for this position.

For more information on Scott & White, please visit our web site at: [www.sw.org](http://www.sw.org). Scott & White is an equal opportunity employer.

 **SCOTT & WHITE**  **HEALTH SCIENCE CENTER**  
COLLEGE OF MEDICINE

*Saint Mary's Hospital is committed to providing physicians with outstanding opportunities in a friendly environment that balances your career with your active and enriching lifestyle. Centrally located in Waterbury, CT, we're an easy ride to several major metro areas - including NYC, New Haven, Hartford, and Boston. With a variety of recreational opportunities and highly affordable housing, Saint Mary's is quickly becoming one of CT's most desirable career destinations.*

**Staff Psychiatrist**

Full-time  
Full benefits plus paid CME  
Responsible for providing ER and Inpatient Psychiatric services and care. Light workload provides a unique opportunity to create a private practice.

 **Saint Mary's HOSPITAL**

Interested candidates, please send resumes to Nancy Miko:  
Tel: (203) 709-3031 • Fax: (203) 709-7753  
Email: [NMiko@stmh.org](mailto:NMiko@stmh.org)  
[www.stmh.org](http://www.stmh.org) EOE



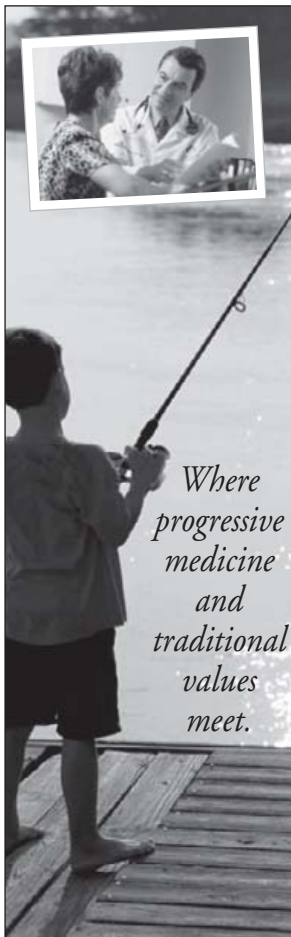

Where  
progressive  
medicine  
and  
traditional  
values  
meet.

**Marshfield Clinic** is nationally recognized for providing physicians with the most advanced medical equipment and health information technology today. Surrounded by nature's beauty in Wisconsin, we are located in communities where neighbors know one another.

**We have openings for BE/BC Adult Psychiatrists** to join our expanding services. The practice can be a mix of C/A and adult patients. These are primarily outpatient practices which focus on a multidisciplinary team approach.

With over 770 physicians practicing at 43 locations throughout Wisconsin, Marshfield Clinic is the leader in providing high quality health care to the region. We have created an atmosphere for a clinical practice that exceeds most others. We offer physicians an excellent practice in an academic setting with opportunities for research and teaching.

To learn more about these opportunities and the very competitive compensation package, please contact: Beth Albee, Physician Recruitment, **Marshfield Clinic**, 1000 N. Oak Ave., Marshfield, WI 54449. Phone: 800-782-8581, extension 19775; Fax #: 715-221-9779.

E-mail: [albee.beth@marshfieldclinic.org](mailto:albee.beth@marshfieldclinic.org)  
Website: [www.marshfieldclinic.org/recruit](http://www.marshfieldclinic.org/recruit)

 **MARSHFIELD CLINIC.**  
*Where the future of medicine lives*

Marshfield Clinic is an Affirmative Action/Equal Opportunity employer that values diversity. Minorities, females, individuals with disabilities and veterans are encouraged to apply.

 **NC DEPARTMENT OF  
HEALTH AND HUMAN SERVICES**  
[www.ncdhhs.gov](http://www.ncdhhs.gov)

### Looking for meaningful work? A balance between work and life?

At the North Carolina Department of Health and Human Services...

#### Optimal Work Scheduling = Optimum Quality of Life

At DHHS, you can experience the satisfaction of serving the psychiatric needs of NC citizens and work in affiliation with prominent residency programs, such as University of NC, Duke University, and Wake Forest University.

NC DHHS not only offers competitive salaries and comprehensive benefits, but options and incentives to fit your work-life needs.

These include:

- **Loan Repayment Program**
- **High Needs Bonus**
- **Flexible and Part-Time Scheduling**
- **Special Pay Incentives for additional hours worked**
- **Medical Malpractice Insurance**

**For more information visit: [www.ncdhhs.gov/](http://www.ncdhhs.gov/)**

Contact John Grimes at (919) 733-2940  
or [john.grimes@ncmail.net](mailto:john.grimes@ncmail.net)

North Carolina State Government Employer of Choice • EEO/AA Employer

## CHILD AND ADULT PSYCHIATRIST

Board Eligible or Certified, for 20 to 40 hr. positions to work at North Suffolk Mental Health Association at our Revere or Chelsea Clinic Sites.

Candidate will be lead psychiatrist for a Multidisciplinary Team at one or more Community Counseling Centers. Job entails psychiatric evaluations and medication follow-up appointments, and will provide consultation to weekly multidisciplinary team meetings.

S/he will have the opportunity to supervise a prescribing CNP and clinical staff, and may supervise MGH/McLean Residents. An MGH/Harvard appointment is possible with the right credentials.

Excellent Pay based on background and experience; generous benefit package. Interested candidates should send cover letter and resume to:

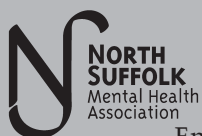

Recruiter  
301 Broadway  
Chelsea, MA 02150  
Fax 617-912-7971

Email: [gethired@northsuffolk.org](mailto:gethired@northsuffolk.org)

You can also contact Nancy McDonnell, MD at [nmcdonnell@northsuffolk.org](mailto:nmcdonnell@northsuffolk.org)

*Equal Opportunity Employer*

## PSYCHIATRIST

The VA Medical Center, Spokane, WA, is seeking a full time psychiatrist to join our clinical team. The psychiatrist will join seven psychiatrist colleagues in providing a full range of clinical services in our Behavioral Health Service.

The person selected for this position will provide assessment and management of psychiatric inpatients on our 8 bed ward, which is slated for expansion to 12 beds in the near future. The incumbent will also provide psychiatric consultation to medical and surgical inpatients in the general hospital.

On call duties are shared among the eight Behavioral Health Service psychiatrists.

Located in the heart of the Pacific Northwest, Spokane is a vibrant community with a metro population of approximately 400,000. Spokane offers exceptional recreational, educational, and cultural opportunities in a four-season climate.

Our physicians enjoy a unique quality mix of career and leisure time. Benefits include:

- Salaried position
- Malpractice coverage
- Excellent retirement program
- Generous paid vacation/sick/CME days
- 10 paid holidays

Call or send resume in confidence to:

**Gregory Winter, MD**  
Chief, Behavioral Health Service  
Spokane VA Medical Center  
4815 N. Assembly  
Spokane, WA 99205-6197  
Telephone: 509-434-7260  
Fax: 509-434-7113

*THE VA IS AN EQUAL OPPORTUNITY EMPLOYER*



# Psychiatrists... Explore Outstanding Career Opportunities in British Columbia, Canada

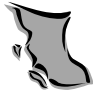

Psychiatry in BC

[www.psychiatryinbc.com](http://www.psychiatryinbc.com)

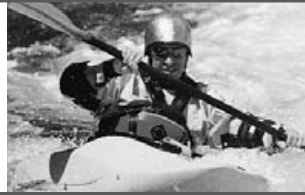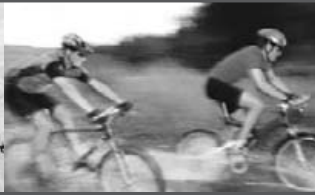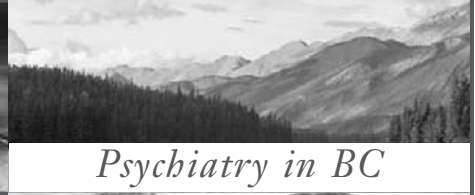

Psychiatry in BC

**WORK WITH WORLD-CLASS LEADERS  
IN THE FIELD OF MENTAL HEALTH**

**HEALTHCARE IN BRITISH COLUMBIA IS OFFERING UNIQUE &  
FLEXIBLE LIFESTYLE RELOCATION PACKAGES THAT MAY  
INCLUDE THE FOLLOWING:**

- AIRFARE ALLOWANCE FOR YOU AND YOUR FAMILY
- PERSONALIZED ONBOARDING ASSISTANCE
- ACCOMMODATION ASSISTANCE
- MOVING/SHIPPING ALLOWANCE

**OTHER BENEFITS INCLUDE:**

- INTERNATIONALLY COMPETITIVE SALARY
- PROFESSIONAL REGISTRATION AND LICENSING ASSISTANCE
- PROFESSIONAL DEVELOPMENT AND RESEARCH OPPORTUNITIES
- ACCESS TO STATE-OF-THE-ART TECHNOLOGY AND RESOURCES

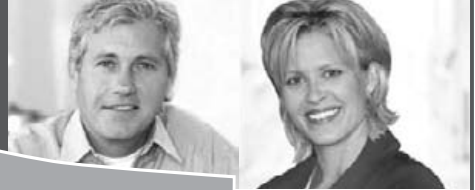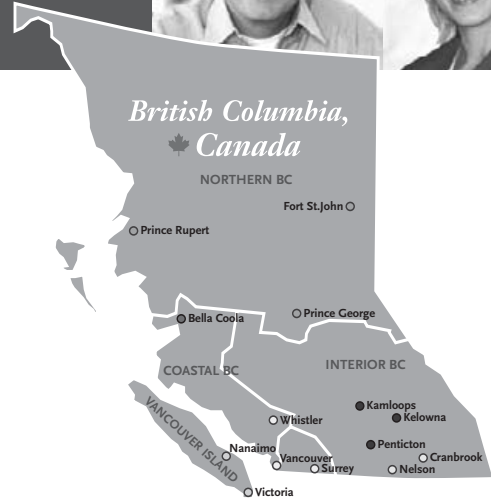

## Psychiatrists... A Career Adventure Awaits YOU

The province of British Columbia is breaking new ground with its innovative, decentralized model for mental health care. Based on best practice standards, British Columbia is replacing large tertiary institutions with smaller, more home-like facilities. The goal of this visionary initiative is to improve access to specialized mental health care by increasing system capacity and reducing the need for travel. BC's Health Authorities are working together to develop these new tertiary level mental health beds. This means that some BC patients have already begun to benefit from these smaller, more personalized health care settings and the positive impact that comes from being closer to family and friends.

As a Psychiatrist within one of BC's Tertiary Psychiatry Programs you will be empowered with the ability to steer the implementation of our exciting mental health model. You will be a driving force, and play an integral part in positively impacting the lives of our patients and shaping the future direction of our mental health services in your choice of settings from urban to rural community facilities.

As an accomplished leader in your field, your expertise will be valued within an environment that is as dedicated to the future of mental health as you are. You will become part of a specialized interdisciplinary team that is recognized for its superior contribution to adult, neuro, pediatric, geriatric and

forensic psychiatry, and includes some of the most reputable psychiatrists worldwide. You will benefit from all the resources that come with being part of academic health science centres affiliated with the University of British Columbia, the University of Victoria, and the University of Northern British Columbia, plus be surrounded by the breathtaking beauty of this Province. By accepting one of our psychiatry opportunities, you and your family will be able to take advantage of the first-class quality of life offered in British Columbia, home of the 2010 Winter Olympic Games. From the clean air and clear water to the exceptional schools and ample housing options in safe, culturally diverse communities, you will find living and working in BC a truly rewarding experience.

Make an impact in mental health care and enjoy Canada's West Coast life-style in this one-of-a-kind opportunity. Please forward your CV, and all relocation or general enquiries, in confidence, to:

**Psychiatry in BC, Suite 800, 1441 Creekside Drive,  
Vancouver, BC, Canada V6J 4S7 Fax: 604-875-7253 or E-mail:  
[psychiatryinbc@phsa.ca](mailto:psychiatryinbc@phsa.ca)**

For more detailed information and eligibility requirements, visit **[www.psychiatryinbc.com](http://www.psychiatryinbc.com)**

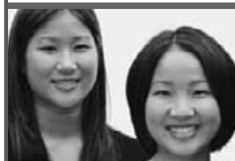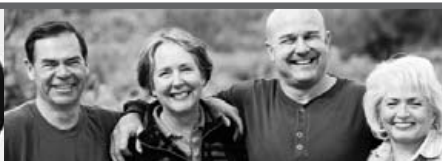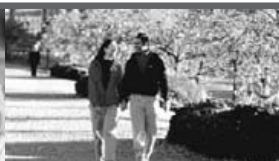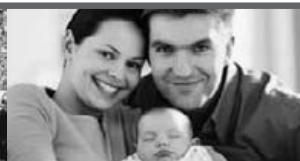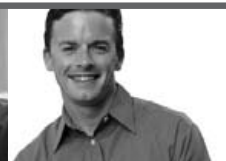

Photo credit: Tourism BC

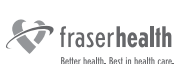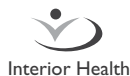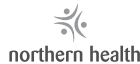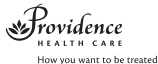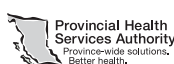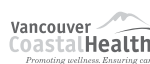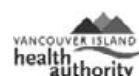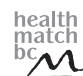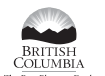



IOWA HEALTH PHYSICIANS, AN AFFILIATE OF THE IOWA HEALTH SYSTEM, IS SEARCHING FOR **PSYCHIATRISTS** TO JOIN OUR GROWING PRACTICE IN DES MOINES, IOWA.

### Practice Overview

- Clinic is located on the campus of Iowa Lutheran Hospital, the state's largest private hospital-based mental health facility
- Adult inpatient and outpatient responsibilities
- Teaching opportunities available
- Call schedule 1:4
- Excellent compensation/benefit package, including a 2-year salary guarantee, production-based pay, sign-on bonus, and relocation package
- Loan repayment opportunities
- Visa sponsorship available
- First-year compensation potential of \$220,000+

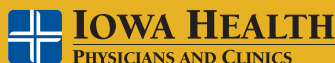

For More Information Please Contact Jessica Meisner at 888-343-4912 or at meisnejj@ihs.org.

THE INSTITUTE OF LIVING / HARTFORD HOSPITAL

## SEEKING: ACADEMIC CHILD & ADOLESCENT PSYCHIATRIST

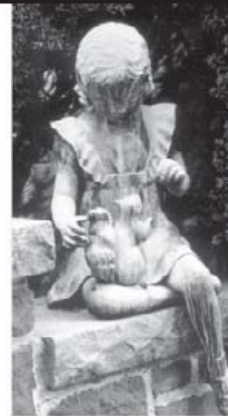

- Half-time support for research activities
- Academic affiliation with Yale or the University of Connecticut
- Combine with position as Director of C/A Residency Training, or providing clinical care and teaching

### Send Inquiries to:

Robert A. Sahl, M.D.  
Division Chief, Child and Adolescent Services  
rsahl@harthosp.org  
or  
Michael Stevens, Ph.D.  
mstevens@harthosp.org

*Located in the heart of Connecticut, Hartford enjoys easy access to diverse cultural, sporting and outdoor activities, including those in New York City and Boston.*

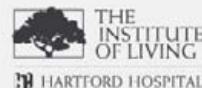

FOR DETAILS:  
[www.instituteofliving.org/ChAdolPsychiatrist.pdf](http://www.instituteofliving.org/ChAdolPsychiatrist.pdf)

[www.instituteofliving.org](http://www.instituteofliving.org)  
EOE M/F/D/V

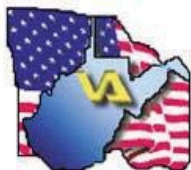

## Louis A. Johnson VA Healthcare System

*Serving those who have served...*

The Louis A. Johnson VA Healthcare System is actively recruiting highly motivated and dedicated professionals to join our Behavioral Medicine & Rehabilitation Service Team. Our progressive healthcare system includes the VA Medical Center in Clarksburg, WV, four Community Based Outpatient Clinics in Braxton, Tucker, Wood and Monongalia counties, plus a Community & Rural Healthcare Mobile Clinic. Successful candidates will join a team of highly skilled professionals who provide acute psychiatry and a broad scope of outpatient behavioral medicine services to veterans in north central West Virginia and surrounding counties of Ohio, Pennsylvania and Maryland.

### We are currently recruiting for Psychiatrists and Psychologists for the Behavioral Medicine & Rehabilitation Service Team.

The Clarksburg, WV area offers the tranquility of rural living with ready access to metropolitan areas of Pittsburgh, PA, Washington, DC and Charleston, WV. The Louis A. Johnson VA Healthcare System is a healthcare leader in the community and offers an attractive recruitment and benefit package including:

- Competitive salary rates and performance pay
- Generous vacation and sick leave
- Life and health insurance
- 401(K) type retirement plan with matching funds in addition to Federal Retirement Funds
- Education Debt Reduction Fund
- Affiliation with the West Virginia University School of Medicine
- Malpractice coverage provided at no cost to the employee
- On-site parking
- Education and career advancement

**In addition, Recruitment & Relocation incentives may be offered. Please contact Dr. Glenn Snider, CO5 at (304) 623-3461 ext. 3206. For more information visit [www.usajobs.gov](http://www.usajobs.gov)**

EOE

EOE



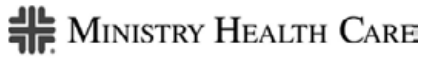

today. tomorrow. together.

### A Place Where You Can Make a Difference

Ministry Health Care is seeking BC/BE Psychiatrists to join our multi-specialty group. You will enjoy a high-caliber clinical opportunity in a progressive environment.

#### Services Offered:

- Established behavioral health service
- Flexible Hours
- Full-spectrum psychiatry: Teams of social workers, case workers, and mid-level providers.
- Addiction Psychiatry
- General & Child/Adolescent
- Qualified support staff
- Opportunity to do ECT

Contact information: For more information about physician career opportunities or to send your curriculum vitae (CV), please contact:

Claudine Taub, RN, Dir. of Physician Recruitment  
 Phone: 715.498.3688  
 Fax: 715.342.7910  
 E-mail: [mngrecruitment@ministryhealth.org](mailto:mngrecruitment@ministryhealth.org)  
[ministryhealth.org/recruitment](http://ministryhealth.org/recruitment)

\*\*\* Ministry Health Care is an Equal Opportunity Employer.

## PSYCHIATRISTS

The VA Needs You

Shreveport, LA  
 Alexandria, LA  
 Biloxi, MS

Pensacola, FA  
 Mt. Vernon, MO  
 Muskogee, OK

Fayetteville, AR  
 Fort Smith, AR  
 Mobile, AL

Psychiatrist positions require: BE/BC Psychiatrists, current, full, unrestricted licensure (any state), U.S. citizen Great Benefits, Excellent Pay, Rewarding Work. See announcements on [www.vacareers.va.gov](http://www.vacareers.va.gov). Recruitment/Relocation incentives may be authorized, ask contact individual for details.

**BILOXI/PENSACOLA** Outpatient and Inpatient Psychiatry positions. Expertise in substance abuse, geropsychiatry and PTSD preferred. BE/BC psychiatrist, state license (any state), U.S. citizen or permanent resident. Send applications to Jean Williams, HRMS (05A), 400 Veterans Avenue, Biloxi, MS or contact at [jean.williams@med.va.gov](mailto:jean.williams@med.va.gov) or (228) 523-5633.

**ALEXANDRIA** Strong clinical skills. Prefer experience in Geropsychiatry, Substance Abuse and/or PTSD. CV/Application to [tammie.arnold@va.gov](mailto:tammie.arnold@va.gov) or Tammie Arnold, Psychiatry Service (116), P.O. Box 69004, Alexandria, LA 71306-9004. (318) 473-0010 ext 2696.

**SHREVEPORT** Prefer experience in Substance Abuse, PTSD. Contact Kay Cox at (318) 221-8411, ext 6772 or [kay.cox@va.gov](mailto:kay.cox@va.gov). Email or mail your CV to VAMC, HRMS (05) KC, 510 E. Stoner Ave, Shreveport, LA 71101.

**FAYETTEVILLE, MT. VERNON, FORT SMITH** Contact Laura Berg, HRMS, at [laura.berg2@va.gov](mailto:laura.berg2@va.gov) or (479) 443-4301, ext 5191.

**MUSKOGEE, OK** Contact Jason Cleveland, HRMS at 918-577-3800.

EASTERN VIRGINIA MEDICAL SCHOOL (EVMS) has initiated a search for a talented faculty member at the rank of Assistant or Associate Professor in the Department of Psychiatry and Behavioral Sciences. EVMS is located in a beautiful, coastal area of Virginia in the second largest metropolitan area in the state.

This is a full-time position in a department that has a major commitment to clinical, educational and teaching activities. Clinical responsibilities include inpatient treatment, consultations, and emergency room evaluations at Sentara Norfolk General Hospital, as well as outpatient services at Eastern Virginia Medical School's Department of Psychiatry and Behavioral Sciences. Teaching responsibilities include education and supervision of psychiatric residents and medical students, as well as students from related disciplines, including Psychology and Art Therapy.

The position will also emphasize participation in research activities within an academic culture, which places EVMS at the forefront of mental health advances. Currently the EVMS Department of Psychiatry includes 21 full-time faculty members, and the Residency Training Program has 16 residents and is fully accredited by ACGME. The successful candidate should have the ability to significantly contribute to the tripartite mission of education, research and patient-centered quality care. Eastern Virginia Medical School encourages all inquiries and all applications will be held in strictest confidence. Qualified applicants will be reviewed in the order in which their applications are received, and the process will continue until the current position is filled. Please send letters of interest, accompanied by three letters of reference, to:

Paul Sayegh, MD, Vice-Chair  
 Department of Psychiatry and Behavioral Sciences  
 Suite 710, Hofheimer Hall  
 825 Fairfax Avenue  
 Norfolk, VA 23507  
 fax: 757-446-5918

Inquiries may also be addressed to [sayeghpa@evms.edu](mailto:sayeghpa@evms.edu).  
EVMS is an AA/EOE/Drug Free Workplace

## PARTNER WITH A MAGNET HOSPITAL

BC/BE Psychiatrist needed to serve as Medical Director of an 11-bed Inpatient Behavioral Health Services Unit and to add capacity for our Outpatient Program.

Call is shared with 5 local psychiatrists. Practice is located at Aspirus Wausau Hospital, named in the top 100 hospitals in the USA by *US News and World Report*. Work with a great team of young, vibrant psychiatrists. There is great potential for program growth and development with a focus on expanded community action. Excellent compensation and benefit package included.

As you work within the open and inviting architecture of Aspirus, you will be part of our outstanding award-winning facility. We invite you to join a first-rate medical community and a family-friendly quality of life in north central Wisconsin.

Please contact Jamie Sitko today at 800-792-8728 or fax CV to 715-847-2742.

Email: [jamiesi@aspirus.org](mailto:jamiesi@aspirus.org)  
[www.aspirus.org](http://www.aspirus.org)

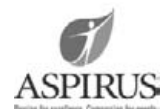



# Index to Advertisers October 2008

The publication of an advertisement in this journal does not imply endorsement of the product or service by the American Psychiatric Association.

|                                                  |         |
|--------------------------------------------------|---------|
| AstraZeneca                                      |         |
| Seroquel .....                                   | A7-A14  |
| Bristol-Myers Squibb Company                     |         |
| Abilify .....                                    | A37-A40 |
| Jazz Pharmaceuticals                             |         |
| Luvox .....                                      | A17-A22 |
| McNeil PPC Inc.                                  |         |
| Concerta .....                                   | A31-A32 |
| Montefiore Medical Center .....                  | A23     |
| Employment Opportunities .....                   | A43-A48 |
| Laclede, Inc. ....                               | A1      |
| Lindner Center of HOPE .....                     | A36     |
| Insitute of Living/Hartford Hospital .....       | A41     |
| NYU Post Graduate<br>Medical School .....        | A41     |
| Osler Institute .....                            | A41     |
| University of Pittsburgh<br>Medical Center ..... | A2      |
| U.S. Pharmaceuticals, Pfizer, Inc.               |         |
| Geodon .....                                     | A25-A26 |
| Geodon IM .....                                  | A29-A30 |
| Wyeth Pharmaceuticals                            |         |
| Effexor .....                                    | A33-A35 |
| Pristiq .....                                    | A50-C4  |

## The American Psychiatric Publishing Textbook of Psychiatry, Fifth Edition

Edited by Robert E. Hales, M.D., M.B.A.,  
Stuart C. Yudofsky, M.D., and  
Glen O. Gabbard, M.D.

With Foreword by Alan F. Schatzberg, M.D.

An indispensable resource for clinical psychiatrists studying for Part I of the American Board of Psychiatry and Neurology exam, *The American Psychiatric Publishing Textbook of Psychiatry* is a proven teaching tool and an essential component of every practitioner's library.

April 2008 • 1,904 pages • ISBN 978-1-58562-257-3  
Hardcover • \$285.00 • Item #62257

Order Online: [www.appi.org](http://www.appi.org)  
Toll Free: 1-800-368-5777 • Fax: 703-907-1091  
Email: [appi@psych.org](mailto:appi@psych.org) Priority Code AH830

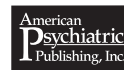

The First and Last Word in Psychiatry  
1000 Wilson Boulevard, Suite 1825, Arlington, VA 22209-3901

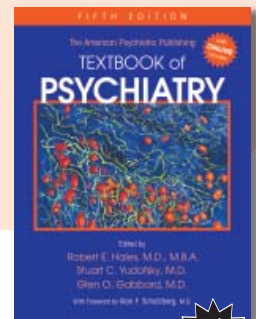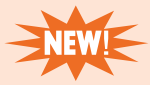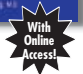

## Mentalizing in Clinical Practice

Jon G. Allen, Ph.D., Peter Fonagy, Ph.D., and  
Anthony W. Bateman, M.A., FRCPsych

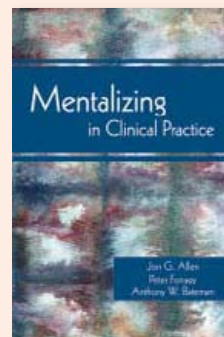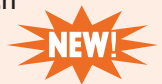

Mentalizing—the fundamental human capacity to understand behavior in relation to mental states such as thoughts and feelings—is the basis of healthy relationships and self-awareness. *Mentalizing in Clinical Practice* distills the burgeoning literature on mentalizing for clinicians of diverse professional backgrounds. As growing evidence supports the effectiveness of mentalizing-focused interventions in the treatment of borderline personality disorder, this volume seeks to explore even wider applications in trauma treatment, parent-child therapy, psychoeducation, and violence prevention in social systems.

2008 • 433 pages • ISBN 978-1-58562-306-8  
paperback • \$55.00 • Item #62306

Order Online: [www.appi.org](http://www.appi.org)  
Toll Free: 1-800-368-5777 • Fax: 703-907-1091  
Email: [appi@psych.org](mailto:appi@psych.org) Priority Code AH843

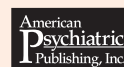

The First and Last Word in Psychiatry  
1000 Wilson Boulevard, Suite 1825, Arlington, VA 22209-3901



## Subscription and Business Information

The American Journal of Psychiatry, ISSN 0002-953X, is published monthly by the American Psychiatric Association, 1000 Wilson Blvd., Suite 1825, Arlington, VA 22209-3901. Subscriptions (per year): individual \$205.00, international \$308.00. For additional subscription options, including single issues and student rates, please contact Customer Service at 1-800-368-5777 or email [appi@psych.org](mailto:appi@psych.org). Institutional subscriptions are tier priced. For institutional site license or pricing information, contact Customer Service or visit <http://highwire.stanford.edu/tfocis/>.

Business communications, address changes, and subscription questions from APA members should be directed to the Division of Member Services: (888) 35-PSYCH (toll-free). Nonmember subscribers should call the Circulation Department (800) 368-5777. Author inquiries should be directed to the Journal editorial office: (703) 907-7885 or (703) 907-7884; fax (703) 907-1096; e-mail [ajp@psych.org](mailto:ajp@psych.org).

Business Management: Nancy Frey, Director, Publishing Services; Laura G. Abedi, Associate Director, Production; Brian Skepton, Advertising Sales and Marketing Manager, Nonpharmaceutical and Online Sales; Alison Jones, Advertising Prepress Manager; Robert Pursell, Director, Sales and Marketing.

Director, Advertising Sales: Raymond J. Purkis, Director, 2444 Morris Avenue, Union, NJ 07083; (908) 964-3100.

Pages are produced using Adobe FrameMaker+ SGML 6.0. Printed by RR Donnelley, Mendota, IL, on acid-free paper effective with Volume 164, Number 11, November 2007.

Periodicals postage paid at Arlington, VA, and additional mailing offices. POSTMASTER: Send address changes to The American Journal of Psychiatry, Circulation Department, American Psychiatric Association, 1000 Wilson Blvd., Suite 1825, Arlington, VA 22209-3901.

Indexed in Abstracts for Social Workers, Academic Abstracts, Biological Abstracts, Chemical Abstracts, Chicago Psychoanalytic Literature Index, Cumulative Index to Nursing Literature, Excerpta Medica, Hospital Literature Index, Index Medicus, International Nursing Index, Nutrition Abstracts, Psychological Abstracts, Science Citation Index, Social Science Source, and Social Sciences Index.

The American Psychiatric Association does not hold itself responsible for statements made in its publications by contributors or advertisers. Unless so stated, material in The American Journal of Psychiatry does not reflect the endorsement, official attitude, or position of the American Psychiatric Association or of the Journal's Editorial Board.

Authorization to photocopy items for internal or personal use, or the internal or personal use of specific clients, is granted by the American Psychiatric Association for libraries and other users registered with the Copyright Clearance Center (CCC) Transactional Reporting Service, provided that the base fee of \$15.00 per copy is paid directly to CCC, 222 Rosewood Drive, Danvers, MA 01923; (978) 750-8400 (tel), (978) 646-8600 (fax), [www.copyright.com](http://www.copyright.com) (web site). 0002-953X/05/\$15.00.

This consent does not extend to other kinds of copying, such as copying for general distribution, for advertising or promotional purposes, for creating new collective works, or for resale. Requests for commercial distribution should be directed to (703) 907-7894. APA does not require that permission be obtained for the photocopying of isolated articles for nonprofiting classroom or library reserve use; all fees associated with such permission are waived.

Copyright © 2008 American Psychiatric Association.

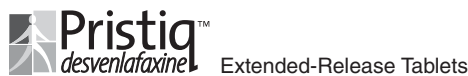

**BRIEF SUMMARY:** See package insert for full Prescribing Information. For further product information and current package insert, please visit [www.wyeth.com](http://www.wyeth.com) or call our medical communications department toll-free at 1-800-934-5556.

### WARNING: Suicidality and Antidepressant Drugs

**Antidepressants increased the risk compared to placebo of suicidal thinking and behavior (suicidality) in children, adolescents, and young adults in short-term studies of Major Depressive Disorder (MDD) and other psychiatric disorders. Anyone considering the use of Pristiq or any other antidepressant in a child, adolescent, or young adult must balance this risk with the clinical need. Short-term studies did not show an increase in the risk of suicidality with antidepressants compared to placebo in adults beyond age 24; there was a reduction in risk with antidepressants compared to placebo in adults aged 65 and older. Depression and certain other psychiatric disorders are themselves associated with increases in the risk of suicide. Patients of all ages who are started on antidepressant therapy should be monitored appropriately and observed closely for clinical worsening, suicidality, or unusual changes in behavior. Families and caregivers should be advised of the need for close observation and communication with the prescriber. Pristiq is not approved for use in pediatric patients [see Warnings and Precautions (5.1), Use in Specific Populations (8.4), and Patient Counseling Information (17.1 in the full prescribing information)].**

**INDICATIONS AND USAGE:** Pristiq, a selective serotonin and norepinephrine reuptake inhibitor (SNRI), is indicated for the treatment of major depressive disorder (MDD).

**CONTRAINDICATIONS:** Hypersensitivity-Hypersensitivity to desvenlafaxine succinate, venlafaxine hydrochloride or to any excipients in the Pristiq formulation. **Monoamine Oxidase Inhibitors**-Pristiq must not be used concomitantly in patients taking monoamine oxidase inhibitors (MAOIs) or in patients who have taken MAOIs within the preceding 14 days due to the risk of serious, sometimes fatal, drug interactions with SNRI or SSRI treatment or with other serotonergic drugs. Based on the half-life of desvenlafaxine, at least 7 days should be allowed after stopping Pristiq before starting an MAOI [see Dosage and Administration (2.5) in the full prescribing information].

**WARNINGS AND PRECAUTIONS: Clinical Worsening and Suicide Risk**-Patients with major depressive disorder (MDD), both adult and pediatric, may experience worsening of their depression and/or the emergence of suicidal ideation and behavior (suicidality) or unusual changes in behavior, whether or not they are taking antidepressant medications, and this risk may persist until significant remission occurs. Suicide is a known risk of depression and certain other psychiatric disorders, and these disorders themselves are the strongest predictors of suicide. There has been a long-standing concern, however, that antidepressants may have a role in inducing worsening of depression and the emergence of suicidality in certain patients during the early phases of treatment. Pooled analyses of short-term placebo-controlled studies of antidepressant drugs (SSRIs and others) showed that these drugs increase the risk of suicidal thinking and behavior (suicidality) in children, adolescents, and young adults (ages 18-24) with major depressive disorder (MDD) and other psychiatric disorders. Short-term studies did not show an increase in the risk of suicidality with antidepressants compared to placebo in adults beyond age 24; there was a reduction with antidepressants compared to placebo in adults aged 65 and older. The pooled analyses of placebo-controlled studies in children and adolescents with MDD, obsessive compulsive disorder (OCD), or other psychiatric disorders included a total of 24 short-term studies of 9 antidepressant drugs in over 4,400 patients. The pooled analyses of placebo-controlled studies in adults with MDD or other psychiatric disorders included a total of 295 short-term studies (median duration of 2 months) of 11 antidepressant drugs in over 77,000 patients. There was considerable variation in risk of suicidality among drugs, but a tendency toward an increase in the younger patients for almost all drugs studied. There were differences in absolute risk of suicidality across the different indications, with the highest incidence in MDD. The risk differences (drug vs. placebo), however, were relatively stable within age strata and across indications. These risk differences (drug-placebo difference in the number of cases of suicidality per 1000 patients treated) are provided in Table 1 of the full prescribing information. No suicides occurred in any of the pediatric studies. There were suicides in the adult studies, but the number was not sufficient to reach any conclusion about drug effect on suicide. It is unknown whether the suicidality risk extends to longer-term use, i.e., beyond several months. However, there is substantial evidence from placebo-controlled maintenance studies in adults with depression that the use of antidepressants can delay the recurrence of depression. **All patients being treated with antidepressants for any indication should be monitored appropriately and observed closely for clinical worsening, suicidality, and unusual changes in behavior, especially during the initial few months of a course of drug therapy, or at times of dose changes, either increases or decreases.** The following symptoms, anxiety, agitation, panic attacks, insomnia, irritability, hostility, aggressiveness, impulsivity, akathisia (psychomotor restlessness), hypomania, and mania, have been reported in adult and pediatric patients being treated with antidepressants for major depressive disorder as well as for other indications, both psychiatric and nonpsychiatric. Although a causal link between the emergence of such symptoms and either the worsening of depression and/or the emergence of suicidal impulses has not been established, there is concern that such symptoms may represent precursors to emerging suicidality. Consideration should be given to changing the therapeutic regimen, including possibly discontinuing the medication, in patients whose depression is persistently worse, or who are experiencing emergent suicidality or symptoms that might be precursors to worsening depression or suicidality, especially if these symptoms are severe, abrupt in onset, or were not part of the patient's presenting symptoms. If the decision has been made to discontinue treatment, medication should be tapered, as rapidly as is feasible, but with recognition that abrupt discontinuation can be associated with certain symptoms [see Warnings and Precautions (5.9) and Dosage and Administration (2.3) in the full prescribing information for a description of the risks of discontinuation of Pristiq]. Families and caregivers of patients being treated with antidepressants for major depressive disorder or other indications, both psychiatric and nonpsychiatric, should be alerted about the need to monitor patients for the emergence of agitation, irritability, unusual changes in behavior, and the other symptoms described above, as well as the emergence of suicidality, and to report such symptoms immediately to health care providers. Such monitoring should include daily observation by families and caregivers. Prescriptions for Pristiq should be written for the smallest quantity of tablets consistent with good patient management, in order to reduce the risk of overdose. **Screening patients for bipolar disorder**-A major depressive episode may be the initial presentation of bipolar disorder. It is generally believed (though not established in controlled studies) that treating such an episode with an antidepressant alone may increase the likelihood of precipitation of a mixed/manic episode in patients at risk for bipolar disorder. Whether any of the symptoms described above represent such a conversion is unknown. However, prior to initiating treatment with an antidepressant, patients with depressive symptoms should be adequately screened to determine if they are at risk for bipolar disorder; such screening should include a detailed psychiatric history, including a family history of suicide, bipolar disorder, and depression. It should be noted that Pristiq is not approved for use in treating bipolar depression. **Serotonin Syndrome**-The development of a potentially life-threatening serotonin syndrome may occur with Pristiq treatment, particularly with concomitant use of other serotonergic drugs (including SSRIs, SNRIs and triptans) and with drugs that impair metabolism of serotonin (including MAOIs). The concomitant use of Pristiq and MAOIs is contraindicated [see Contraindications (4.2)]. If concomitant treatment with Pristiq and an SSRI, another SNRI or a 5-hydroxytryptamine receptor agonist (triptan) is clinically warranted, careful observation of the patient is advised, particularly during treatment initiation and dose increases. The concomitant use of Pristiq with serotonin precursors (such as tryptophan supplements) is not recommended. **Elevated Blood Pressure**-Patients receiving Pristiq should have regular monitoring of blood pressure since dose-dependent increases were observed in clinical studies. Pre-existing hypertension should be controlled before initiating treatment with Pristiq. Caution should be exercised in treating patients with pre-existing hypertension or other underlying conditions that might be compromised by increases in blood pressure. Cases of elevated blood pressure requiring immediate treatment have been reported with Pristiq. **Sustained hypertension**-Sustained blood pressure increases could have adverse consequences. For patients who experience a sustained increase in blood pressure while receiving Pristiq, either dose reduction or discontinuation should be considered [see Adverse Reactions (6.1)]. Treatment with Pristiq in controlled studies was associated with sustained hypertension, defined as treatment-emergent supine diastolic blood pressure (SDBP)  $\geq 90$  mm Hg and  $\geq 10$  mm Hg above baseline for 3 consecutive on-therapy visits. In clinical studies, regarding the proportion of patients with sustained hypertension, the following rates were observed: placebo (0.5%), Pristiq 50 mg (1.3%), Pristiq 100 mg (0.7%), Pristiq 200 mg (1.1%), and Pristiq 400 mg (2.3%). Analyses of patients in Pristiq controlled studies who met criteria for sustained hypertension revealed a dose-dependent increase in the proportion of patients who developed sustained hypertension. **Abnormal Bleeding**-SSRIs and SNRIs can increase the risk of bleeding events. Concomitant use of aspirin, other drugs that affect platelet function, nonsteroidal anti-inflammatory drugs, warfarin, and other anticoagulants can add to this risk. Bleeding events related to SSRIs and SNRIs have ranged from ecchymosis, hematoma, epistaxis, and petechiae to life-threatening hemorrhages. Patients should be cautioned about the risk of bleeding associated with the concomitant use of Pristiq and NSAIDs, aspirin, or other drugs that affect coagulation or bleeding. **Narrow-angle Glaucoma**-Mydriasis has been reported in association with Pristiq;



therefore, patients with raised intraocular pressure or those at risk of acute narrow-angle glaucoma (angle-closure glaucoma) should be monitored. **Activation of Mania/Hypomania**-During all MDD and VMS (vasomotor symptoms) phase 2 and phase 3 studies, mania was reported for approximately 0.1% of patients treated with Pristiq. Activation of mania/hypomania has also been reported in a small proportion of patients with major affective disorder who were treated with other marketed antidepressants. As with all antidepressants, Pristiq should be used cautiously in patients with a history or family history of mania or hypomania. **Cardiovascular/Cerebrovascular Disease**-Caution is advised in administering Pristiq to patients with cardiovascular, cerebrovascular, or lipid metabolism disorders [see *Adverse Reactions* (6.1)]. Increases in blood pressure and heart rate were observed in clinical studies with Pristiq. Pristiq has not been evaluated systematically in patients with a recent history of myocardial infarction, unstable heart disease, uncontrolled hypertension, or cerebrovascular disease. Patients with these diagnoses, except for cerebrovascular disease, were excluded from clinical studies. **Serum Cholesterol and Triglyceride Elevation**-Dose-related elevations in fasting serum total cholesterol, LDL (low density lipoprotein) cholesterol, and triglycerides were observed in the controlled studies. Measurement of serum lipids should be considered during treatment with Pristiq [see *Adverse Reactions* (6.1)]. **Discontinuation of Treatment with Pristiq**-Discontinuation symptoms have been systematically and prospectively evaluated in patients treated with Pristiq during clinical studies in Major Depressive Disorder. Abrupt discontinuation or dose reduction has been associated with the appearance of new symptoms that include dizziness, nausea, headache, irritability, insomnia, diarrhea, anxiety, fatigue, abnormal dreams, and hyperhidrosis. In general, discontinuation events occurred more frequently with longer duration of therapy. During marketing of SNRIs (Serotonin and Norepinephrine Reuptake Inhibitors) and SSRIs (Selective Serotonin Reuptake Inhibitors), there have been spontaneous reports of adverse events occurring upon discontinuation of these drugs, particularly when abrupt, including the following: dysphoric mood, irritability, agitation, dizziness, sensory disturbances (e.g., paresthesia, such as electric shock sensations), anxiety, confusion, headache, lethargy, emotional lability, insomnia, hypomania, tinnitus, and seizures. While these events are generally self-limiting, there have been reports of serious discontinuation symptoms. Patients should be monitored for these symptoms when discontinuing treatment with Pristiq. A gradual reduction in the dose rather than abrupt cessation is recommended whenever possible. If intolerable symptoms occur following a decrease in the dose or upon discontinuation of treatment, then resuming the previously prescribed dose may be considered. Subsequently, the physician may continue decreasing the dose, but at a more gradual rate [see *Dosage and Administration* (2.4) and *Adverse Reactions* (6.1) in full prescribing information]. **Renal Impairment**-In patients with moderate or severe renal impairment or end-stage renal disease (ESRD) the clearance of Pristiq was decreased, thus prolonging the elimination half-life of the drug. As a result, there were potentially clinically significant increases in exposures to Pristiq [see *Clinical Pharmacology* (12.6) in full prescribing information]. Dose adjustment (50 mg every other day) is necessary in patients with severe renal impairment or ESRD. The doses should not be escalated in patients with moderate or severe renal impairment or ESRD [see *Dosage and Administration* (2.2) in full prescribing information]. **Seizure**-Cases of seizure have been reported in premarketing clinical studies with Pristiq. Pristiq should be prescribed with caution in patients with a seizure disorder. **Hyponatremia**-Hyponatremia can occur as a result of treatment with SSRIs and SNRIs, including Pristiq. In many cases, this hyponatremia appears to be the result of the syndrome of inappropriate antidiuretic hormone secretion (SIADH). Elderly patients can be at greater risk of developing hyponatremia with SSRIs and SNRIs. Also, patients taking diuretics or who are otherwise volume depleted can be at greater risk [see *Use in Specific Populations* (8.5) and *Clinical Pharmacology* (12.6) in full prescribing information]. Discontinuation of Pristiq should be considered in patients with symptomatic hyponatremia and appropriate medical intervention should be instituted. **Coadministration of Drugs Containing Desvenlafaxine and Venlafaxine**-Desvenlafaxine is the major active metabolite of venlafaxine. Products containing desvenlafaxine and products containing venlafaxine should not be used concomitantly with Pristiq. **Interstitial Lung Disease and Eosinophilic Pneumonia**-Interstitial lung disease and eosinophilic pneumonia associated with venlafaxine (the parent drug of Pristiq) therapy have been rarely reported. The possibility of these adverse events should be considered in patients treated with Pristiq who present with progressive dyspnea, cough, or chest discomfort. Such patients should undergo a prompt medical evaluation, and discontinuation of Pristiq should be considered.

**ADVERSE REACTIONS: Clinical Studies Experience:** The most commonly observed adverse reactions in Pristiq-treated MDD patients in short-term fixed-dose studies (incidence  $\geq 5\%$  and at least twice the rate of placebo in the 50- or 100-mg dose groups) were nausea, dizziness, insomnia, hyperhidrosis, constipation, somnolence, decreased appetite, anxiety, and specific male sexual function disorders. **Adverse reactions reported as reasons for discontinuation of treatment:** The most common adverse reactions leading to discontinuation in at least 2% of the Pristiq-treated patients in the short-term studies, up to 8 weeks, were nausea (4%); dizziness, headache and vomiting (2% each); in the long-term study, up to 9 months, the most common was vomiting (2%). **Common adverse reactions in placebo-controlled MDD studies-** Table 3 in full PI shows the incidence of common adverse reactions that occurred in  $\geq 2\%$  of Pristiq-treated MDD patients at any dose in the 8-week, placebo-controlled, fixed-dose, premarketing clinical studies. In general, the adverse reactions were most frequent in the first week of treatment. **Cardiac disorders:** Palpitations, Tachycardia, Blood pressure increased; **Gastrointestinal disorders:** Nausea, Dry mouth, Diarrhea, Constipation, Vomiting; **General disorders and administration site conditions:** Fatigue, Chills, Feeling jittery, Asthenia; **Metabolism and nutrition disorders:** Decreased appetite, weight decreased; **Nervous system disorders:** Dizziness, Somnolence, Headache, Tremor, Paraesthesia, Disturbance in attention; **Psychiatric Disorders:** Insomnia, Anxiety, Nervousness, Irritability, Abnormal dreams; **Renal and urinary disorders:** Urinary hesitation; **Respiratory, thoracic, and mediastinal disorders:** Yawning; **Skin and subcutaneous tissue disorders:** Hyperhidrosis, Rash; **Special Senses:** Vision blurred; Mydriasis, Tinnitus, Dysgeusia; **Vascular Disorders:** Hot flush. **Sexual function adverse reactions-** Table 4 shows the incidence of sexual function adverse reactions that occurred in  $\geq 2\%$  of Pristiq-treated MDD patients in any fixed-dose group (8-week, placebo-controlled, fixed and flexible-dose, premarketing clinical studies). **Men Only:** Anorgasmia, Libido decreased, Orgasm abnormal, Ejaculation delayed, Erectile dysfunction, Ejaculation disorder, Ejaculation failure, Sexual dysfunction; **Women Only:** Anorgasmia **Other adverse reactions observed in premarketing clinical studies:** Other infrequent adverse reactions occurring at an incidence of  $\leq 2\%$  in MDD patients treated with Pristiq were: **Immune system disorders** - Hypersensitivity. **Investigations** - Liver function test abnormal, blood prolactin increased. **Nervous system disorders** - Convulsion, syncope, extrapyramidal disorder. **Psychiatric disorders** - Depersonalization, hypomania. **Respiratory, thoracic and mediastinal disorders** - Epistaxis. **Vascular disorders** - Orthostatic hypotension. In clinical studies, there were uncommon reports of ischemic cardiac adverse events, including myocardial ischemia, myocardial infarction, and coronary occlusion requiring revascularization; these patients had multiple underlying cardiac risk factors. More patients experienced these events during Pristiq treatment as compared to placebo [see *Warnings and Precautions* (5.7)]. **Discontinuation events**-Adverse events reported in association with abrupt discontinuation, dose reduction or tapering of treatment in MDD clinical studies at a rate of  $\geq 5\%$  include dizziness, nausea, headache, irritability, insomnia, diarrhea, anxiety, abnormal dreams, fatigue, and hyperhidrosis. In general, discontinuation events occurred more frequently with longer duration of therapy [see *Dosage and Administration* (2.4) and *Warnings and Precautions* (5.9) in full prescribing information]. **Laboratory, ECG and vital sign changes observed in MDD clinical studies-** The following changes were observed in placebo-controlled, short-term, premarketing MDD studies with Pristiq. **Lipids**-Elevations in fasting serum total cholesterol, LDL (low density lipoproteins) cholesterol, and triglycerides occurred in the controlled studies. Some of these abnormalities were considered potentially clinically significant [see *Warnings and Precautions* (5.8)]. **Proteinuria**-Proteinuria, greater than or equal to trace, was observed in the fixed-dose controlled studies (see Table 6 in full prescribing information). This proteinuria was not associated with increases in BUN or creatinine and was generally transient. **ECG changes**-Electrocardiograms were obtained from 1,492 Pristiq-treated patients with major depressive disorder and 984 placebo-treated patients in clinical studies lasting up to 8 weeks. No clinically relevant differences were observed between Pristiq-treated and placebo-treated patients for QT, QTc, PR, and QRS intervals. In a thorough QTc study with prospectively determined criteria, desvenlafaxine did not cause QT prolongation. No difference was observed between placebo and desvenlafaxine treatments for the QRS interval. **Vital sign changes**-Table 7 summarizes the changes that were observed in placebo-controlled, short-term, premarketing studies with Pristiq in patients with MDD (doses 50 to 400 mg). Relative to placebo, Pristiq was associated with mean increase of up to 2.1 mm Hg in systolic blood pressure, 2.3 mm Hg in diastolic blood pressure, and 4.1 bpm with supine pulse. At the final on-therapy assessment in the 6-month, double-blind, placebo-controlled phase of a long-term study in patients who had responded to Pristiq during the initial 12-week, open-label phase, there was no statistical difference in mean weight gain between Pristiq- and placebo-treated patients. **DRUG INTERACTIONS: Central Nervous System (CNS)-Active Agents**-The risk of using Pristiq in combination with other CNS-active drugs has not been systematically evaluated. Consequently, caution is advised when Pristiq is taken in combination with other CNS-active drugs [see *Warnings and Precautions* (5.13)]. **Monoamine Oxidase Inhibitors (MAOIs)**-Adverse reactions, some of which were serious, have been reported in patients who have recently been discontinued from a monoamine oxidase inhibitor (MAOI) and started on antidepressants with pharmacological properties similar to Pristiq (SNRIs or SSRIs), or who have recently had SNRI or SSRI therapy discontinued prior to initiation of an MAOI [see *Contraindications* (4.2)]. **Serotonergic Drugs**-Based on the mechanism of action of Pristiq and the potential for serotonin syndrome, caution is advised when Pristiq is coadministered with other drugs that may affect the serotonergic neurotransmitter systems [see *Warnings and Precautions* (5.2)]. **Drugs that Interfere with Hemostasis** (e.g.,

**NSAIDs, Aspirin, and Warfarin**)-Serotonin release by platelets plays an important role in hemostasis. Epidemiological studies of case-control and cohort design have demonstrated an association between use of psychotropic drugs that interfere with serotonin reuptake and the occurrence of upper gastrointestinal bleeding. These studies have also shown that concurrent use of an NSAID or aspirin may potentiate this risk of bleeding. Altered anticoagulant effects, including increased bleeding, have been reported when SSRIs and SNRIs are coadministered with warfarin. Patients receiving warfarin therapy should be carefully monitored when Pristiq is initiated or discontinued. **Ethanol**-A clinical study has shown that desvenlafaxine does not increase the impairment of mental and motor skills caused by ethanol. However, as with all CNS-active drugs, patients should be advised to avoid alcohol consumption while taking Pristiq. **Potential for Other Drugs to Affect Desvenlafaxine-Inhibitors of CYP3A4 (ketoconazole)**-CYP3A4 is a minor pathway for the metabolism of Pristiq. Concomitant use of Pristiq with potent inhibitors of CYP3A4 may result in higher concentrations of Pristiq. **Inhibitors of other CYP enzymes**-Based on *in vitro* data, drugs that inhibit CYP isozymes 1A1, 1A2, 2A6, 2D6, 2C8, 2C9, 2C19, and 2E1 are not expected to have significant impact on the pharmacokinetic profile of Pristiq. **Potential for Desvenlafaxine to Affect Other Drugs-Drugs metabolized by CYP2D6 (desipramine)**-*In vitro* studies showed minimal inhibitory effect of desvenlafaxine on CYP2D6. Clinical studies have shown that desvenlafaxine does not have a clinically relevant effect on CYP2D6 metabolism at the dose of 100 mg daily. Concomitant use of desvenlafaxine with a drug metabolized by CYP2D6 can result in higher concentrations of that drug. **Drugs metabolized by CYP3A4 (midazolam)**-*In vitro*, desvenlafaxine does not inhibit or induce the CYP3A4 isozyme. Concomitant use of Pristiq with a drug metabolized by CYP3A4 can result in lower exposures to that drug. **Drugs metabolized by CYP1A2, 2A6, 2C8, 2C9 and 2C19**-*In vitro*, desvenlafaxine does not inhibit CYP1A2, 2A6, 2C8, 2C9, and 2C19 isozymes and would not be expected to affect the pharmacokinetics of drugs that are metabolized by these CYP isozymes. **P-glycoprotein Transporter**-*In vitro*, desvenlafaxine is not a substrate or an inhibitor for the P-glycoprotein transporter. The pharmacokinetics of Pristiq are unlikely to be affected by drugs that inhibit the P-glycoprotein transporter, and desvenlafaxine is not likely to affect the pharmacokinetics of drugs that are substrates of the P-glycoprotein transporter. **Electroconvulsive Therapy**-There are no clinical data establishing the risks and/or benefits of electroconvulsive therapy combined with Pristiq treatment. **USE IN SPECIFIC POPULATIONS: Pregnancy**-Patients should be advised to notify their physician if they become pregnant or intend to become pregnant during therapy. **Teratogenic effects - Pregnancy Category C**-There are no adequate and well-controlled studies of Pristiq in pregnant women. Therefore, Pristiq should be used during pregnancy only if the potential benefits justify the potential risks. **Non-teratogenic effects**-Neonates exposed to SNRIs (Serotonin and Norepinephrine Reuptake Inhibitors), or SSRIs (Selective Serotonin Reuptake Inhibitors), late in the third trimester have developed complications requiring prolonged hospitalization, respiratory support, and tube feeding. Such complications can arise immediately upon delivery. Reported clinical findings have included respiratory distress, cyanosis, apnea, seizures, temperature instability, feeding difficulty, vomiting, hypoglycemia, hypotonia, hypertonia, hyperreflexia, tremor, jitteriness, irritability, and constant crying. These features are consistent with either a direct toxic effect of SSRIs and SNRIs or, possibly, a drug discontinuation syndrome. It should be noted that, in some cases, the clinical picture is consistent with serotonin syndrome [see *Warnings and Precautions* (5.2)]. When treating a pregnant woman with Pristiq during the third trimester, the physician should carefully consider the potential risks and benefits of treatment [see *Dosage and Administration* (2.2)]. **Labor and Delivery**-The effect of Pristiq on labor and delivery in humans is unknown. Pristiq should be used during labor and delivery only if the potential benefits justify the potential risks. **Nursing Mothers**-Desvenlafaxine (O-desmethylvenlafaxine) is excreted in human milk. Because of the potential for serious adverse reactions in nursing infants from Pristiq, a decision should be made whether or not to discontinue nursing or to discontinue the drug, taking into account the importance of the drug to the mother. Only administer Pristiq to breastfeeding women if the expected benefits outweigh any possible risk. **Pediatric Use**-Safety and effectiveness in the pediatric population have not been established [see *Box Warning and Warnings and Precautions* (5.1)]. Anyone considering the use of Pristiq in a child or adolescent must balance the potential risks with the clinical need. **Geriatric Use**-Of the 3,292 patients in clinical studies with Pristiq, 5% were 65 years of age or older. No overall differences in safety or efficacy were observed between these patients and younger patients, but greater sensitivity of some older individuals cannot be ruled out. For elderly patients, possible reduced renal clearance of desvenlafaxine should be considered when determining dose [see *Dosage and Administration* (2.2) and *Clinical Pharmacology* (12.6) in full prescribing information]. **Renal Impairment**-In subjects with renal impairment the clearance of Pristiq was decreased. In subjects with severe renal impairment (24-hr CrCl  $< 30$  mL/min) and end-stage renal disease, elimination half-lives were significantly prolonged, increasing exposures to Pristiq; therefore, dosage adjustment is recommended in these patients [see *Dosage and Administration* (2.2) and *Clinical Pharmacology* (12.6) in full prescribing information]. **Hepatic Impairment**-The mean  $t_{1/2}$  changed from approximately 10 hours in healthy subjects and subjects with mild hepatic impairment to 13 and 14 hours in moderate and severe hepatic impairment, respectively. No adjustment in starting dosage is necessary for patients with hepatic impairment.

**OVERDOSAGE: Human Experience with Overdose**-There is limited clinical experience with desvenlafaxine succinate overdosage in humans. In premarketing clinical studies, no cases of fatal acute overdose of desvenlafaxine were reported. The adverse reactions reported within 5 days of an overdose  $> 600$  mg that were possibly related to Pristiq included headache, vomiting, agitation, dizziness, nausea, constipation, diarrhea, dry mouth, paresthesia, and tachycardia. Desvenlafaxine (Pristiq) is the major active metabolite of venlafaxine. Overdose experience reported with venlafaxine (the parent drug of Pristiq) is presented below; the identical information can be found in the *Overdosage* section of the venlafaxine package insert. In postmarketing experience, overdose with venlafaxine (the parent drug of Pristiq) has occurred predominantly in combination with alcohol and/or other drugs. The most commonly reported events in overdose include tachycardia, changes in level of consciousness (ranging from somnolence to coma), mydriasis, seizures, and vomiting. Electrocardiogram changes (e.g., prolongation of QT interval, bundle branch block, QRS prolongation), sinus and ventricular tachycardia, bradycardia, hypotension, rhabdomyolysis, vertigo, liver necrosis, serotonin syndrome, and death have been reported. Published retrospective studies report that venlafaxine overdose may be associated with an increased risk of fatal outcomes compared to that observed with SSRI antidepressant products, but lower than that for tricyclic antidepressants. Epidemiological studies have shown that venlafaxine-treated patients have a higher pre-existing burden of suicide risk factors than SSRI-treated patients. The extent to which the finding of an increased risk of fatal outcomes can be attributed to the toxicity of venlafaxine in overdose, as opposed to some characteristic(s) of venlafaxine-treated patients, is not clear. Prescriptions for Pristiq should be written for the smallest quantity of capsules consistent with good patient management, in order to reduce the risk of overdose. **Management of Overdosage**-Treatment should consist of those general measures employed in the management of overdose with any SSRI/SNRI. Ensure an adequate airway, oxygenation, and ventilation. Monitor cardiac rhythm and vital signs. General supportive and symptomatic measures are also recommended. Gastric lavage with a large-bore orogastric tube with appropriate airway protection, if needed, may be indicated if performed soon after ingestion or in symptomatic patients. Activated charcoal should be administered. Induction of emesis is not recommended. Because of the moderate volume of distribution of this drug, forced diuresis, dialysis, hemoperfusion, and exchange transfusion are unlikely to be of benefit. No specific antidotes for desvenlafaxine are known. In managing an overdose, consider the possibility of multiple drug involvement. The physician should consider contacting a poison control center for additional information on the treatment of any overdose. Telephone numbers for certified poison control centers are listed in the Physicians Desk Reference (PDR).

This brief summary is based on Pristiq Prescribing Information W10529C002, revised April 2008.

Wyeth®

© 2008, Wyeth Pharmaceuticals Inc., Philadelphia, PA 19101 232600-01



NEW

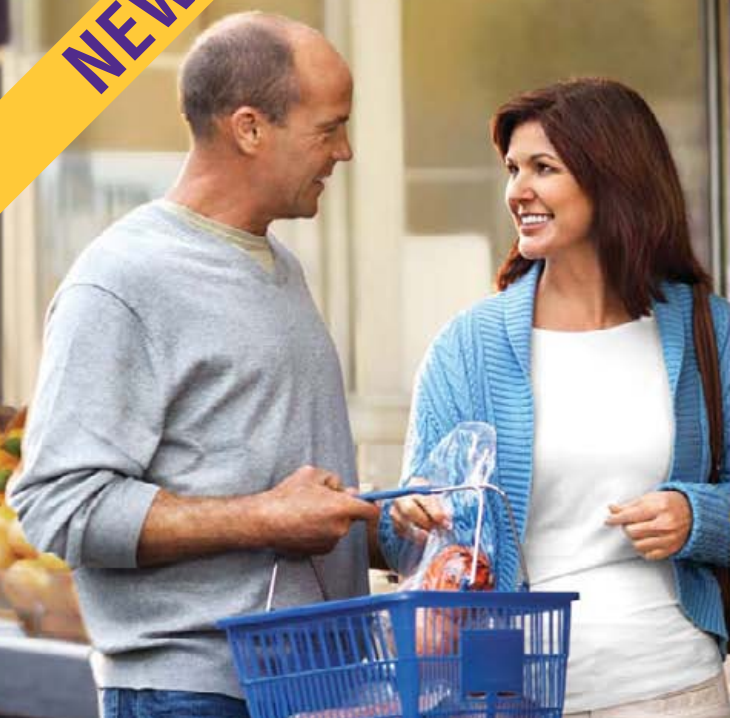

For major depressive disorder in adults

## New SNRI therapy. From the start: One dose. No titration.

- The major active metabolite of Effexor XR® (venlafaxine HCl)<sup>1</sup>
- One simple 50-mg dose, no need to titrate<sup>1</sup>  
— Dosage adjustment is necessary in patients with severe renal impairment or end-stage renal disease and is recommended when discontinuing therapy
- Discontinuation rate due to adverse events was comparable to placebo in clinical studies at 50 mg<sup>1</sup>

New  **Pristiq**<sup>™</sup>  
desvenlafaxine  
EXTENDED-RELEASE TABLETS

### IMPORTANT TREATMENT CONSIDERATIONS

PRISTIQ 50 mg is indicated for the treatment of major depressive disorder in adults.

#### WARNING: SUICIDALITY AND ANTIDEPRESSANT DRUGS

Antidepressants increased the risk compared to placebo of suicidal thinking and behavior (suicidality) in children, adolescents, and young adults in short-term studies of Major Depressive Disorder (MDD) and other psychiatric disorders. Anyone considering the use of PRISTIQ or any other antidepressant in a child, adolescent, or young adult must balance this risk with the clinical need. Short-term studies did not show an increase in the risk of suicidality with antidepressants compared to placebo in adults beyond age 24; there was a reduction in risk with antidepressants compared to placebo in adults aged 65 and older. Depression and certain other psychiatric disorders are themselves associated with increases in the risk of suicide. Patients of all ages who are started on antidepressant therapy should be monitored appropriately and observed closely for clinical worsening, suicidality, or unusual changes in behavior. Families and caregivers should be advised of the need for close observation and communication with the prescriber. PRISTIQ is not approved for use in pediatric patients.

#### Contraindications

- PRISTIQ is contraindicated in patients with a known hypersensitivity to PRISTIQ or venlafaxine.
- PRISTIQ must not be used concomitantly with an MAOI or within 14 days of stopping an MAOI. Allow 7 days after stopping PRISTIQ before starting an MAOI.

#### Warnings and Precautions

- All patients treated with antidepressants should be monitored appropriately and observed closely for clinical worsening, suicidality, and unusual changes in behavior, especially during the first few months of treatment and when changing the dose. Consider changing the therapeutic regimen, including possibly discontinuing the medication, in patients whose depression is persistently worse or includes symptoms of anxiety, agitation, panic attacks, insomnia, irritability, hostility, aggressiveness, impulsivity, akathisia, hypomania, mania, or suicidality that are severe, abrupt in onset, or were not part of the patient's presenting symptoms. Families and caregivers of patients being treated with antidepressants should be alerted about the need to monitor patients.
- Development of a potentially life-threatening serotonin syndrome may occur with SNRIs and SSRIs, including PRISTIQ, particularly with concomitant use of serotonergic drugs, including triptans, and with drugs that impair the metabolism of serotonin (including MAOIs). If concomitant use is clinically warranted, careful observation of the patient is advised, particularly during treatment initiation and dose increases. Concomitant use of PRISTIQ with serotonin precursors is not recommended.
- Patients receiving PRISTIQ should have regular monitoring of blood pressure since sustained increases in blood pressure were observed in clinical studies. Pre-existing hypertension should be controlled before starting PRISTIQ. Caution should be exercised in treating patients with pre-existing hypertension or other underlying conditions that might be compromised by increases in blood pressure. Cases of elevated blood pressure requiring immediate treatment have been reported. For patients who experience a sustained increase in blood pressure, either dose reduction or discontinuation should be considered.

- SSRIs and SNRIs, including PRISTIQ, may increase the risk of bleeding events. Concomitant use of aspirin, NSAIDs, warfarin, and other anticoagulants may add to this risk.
- Mydriasis has been reported in association with PRISTIQ; therefore, patients with raised intraocular pressure or those at risk of acute narrow-angle glaucoma (angle-closure glaucoma) should be monitored.
- PRISTIQ is not approved for use in bipolar depression. Prior to initiating treatment with an antidepressant, patients should be adequately screened to determine the risk of bipolar disorder.
- As with all antidepressants, PRISTIQ should be used cautiously in patients with a history or family history of mania or hypomania, or with a history of seizure disorder.
- Caution is advised in administering PRISTIQ to patients with cardiovascular, cerebrovascular, or lipid metabolism disorders. Increases in blood pressure and small increases in heart rate were observed in clinical studies with PRISTIQ. PRISTIQ has not been evaluated systematically in patients with a recent history of myocardial infarction, unstable heart disease, uncontrolled hypertension, or cerebrovascular disease.
- Dose-related elevations in fasting serum total cholesterol, LDL (low density lipoprotein) cholesterol, and triglycerides were observed in clinical studies. Measurement of serum lipids should be considered during PRISTIQ treatment.
- On discontinuation, adverse events, some of which may be serious, have been reported with PRISTIQ and other SSRIs and SNRIs. Abrupt discontinuation of PRISTIQ has been associated with the appearance of new symptoms. Patients should be monitored for symptoms when discontinuing treatment. A gradual reduction in dose (by giving 50 mg of PRISTIQ less frequently) rather than abrupt cessation is recommended whenever possible.
- Dosage adjustment (50 mg every other day) is necessary in patients with severe renal impairment or end-stage renal disease (ESRD). The dose should not be escalated in patients with moderate or severe renal impairment or ESRD.
- Products containing desvenlafaxine and products containing venlafaxine should not be used concomitantly with PRISTIQ.
- Hyponatremia may occur as a result of treatment with SSRIs and SNRIs, including PRISTIQ. Discontinuation of PRISTIQ should be considered in patients with symptomatic hyponatremia.
- Interstitial lung disease and eosinophilic pneumonia associated with venlafaxine (the parent drug of PRISTIQ) therapy have been rarely reported.

#### Adverse Reactions

- The most commonly observed adverse reactions in patients taking PRISTIQ vs placebo for MDD in short-term fixed-dose premarketing studies (incidence  $\geq 5\%$  and twice the rate of placebo in the 50-mg dose group) were nausea (22% vs 10%), dizziness (13% vs 5%), hyperhidrosis (10% vs 4%), constipation (9% vs 4%), and decreased appetite (5% vs 2%).

Reference: 1. Pristiq<sup>™</sup> (desvenlafaxine) Prescribing Information, Wyeth Pharmaceuticals Inc.

Please see brief summary of Prescribing Information on adjacent pages.

Effexor XR<sup>®</sup> is a registered trademark of Wyeth Pharmaceuticals Inc.

**Pristiq**<sup>™</sup>  
desvenlafaxine

**Wyeth**<sup>®</sup>

© 2008, Wyeth Pharmaceuticals Inc.  
Philadelphia, PA 19101 228251-01
