# THE AMERICAN JOURNAL OF PSYCHIATRY

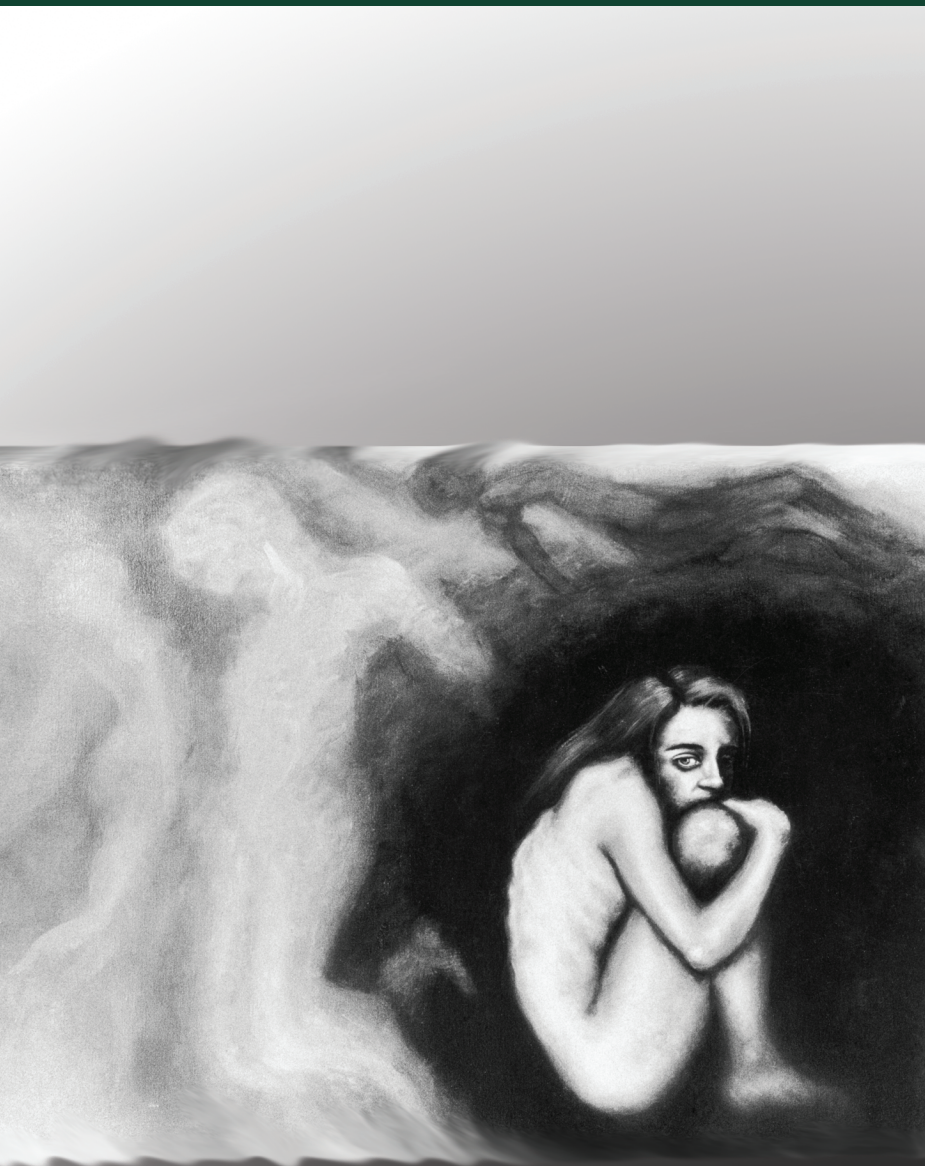

## **Bipolar Drug Development: Are We Getting Closer to the Real World?**

Joseph R. Calabrese, M.D.  
and David E. Kemp, M.D.

1234

## **Putting Housing First, Making Housing Last: Housing Policy for Persons With Severe Mental Illness**

Sandra Newman, Ph.D.  
and Howard Goldman, M.D., Ph.D.

1242

## **Drug Interactions and Pharmacogenomics in the Treatment of Breast Cancer and Depression**

N. Lynn Henry, M.D., Ph.D., et al.

1251

## **◀ Olanzapine in the Treatment of Low Body Weight and Obsessive Thinking in Women With Anorexia Nervosa: A Randomized, Double-Blind, Placebo-Controlled Trial**

Hany Bissada, M.D., et al.

1281

Continuing Medical Education 1365

**October 2008**

**Volume 165 • Number 10**

---

Official Journal of the  
AMERICAN PSYCHIATRIC ASSOCIATION

---

[ajp.psychiatryonline.org](http://ajp.psychiatryonline.org)
