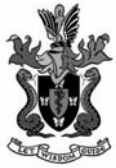

# THE BRITISH JOURNAL OF PSYCHIATRY

September 2008, VOL. 193

- A8 Editorial Board  
A10 Highlights of this issue
- Editorial**  
179 **Can pharmacology help enhance human morality?**  
S.A. Spence
- Review article**  
181 **Computerised cognitive-behavioural therapy for depression: systematic review**  
E. Kaltenthaler, G. Parry, C. Beverley, and M. Ferriter
- Papers**  
185 **IQ and non-clinical psychotic symptoms in 12-year-olds: results from the ALSPAC birth cohort**  
J. Horwood, G. Salvi, K. Thomas, L. Duffy, D. Gunnell, C. Hollis, G. Lewis, P. Menezes, A. Thompson, D. Wolke, S. Zammit, and G. Harrison  
191 **Working with the government**  
Louis Appleby  
192 **Middle-ear disease and schizophrenia: case-control study**  
P. Mason, M. Rimmer, A. Richman, G. Garg, J. Johnson, and P.G. Mottram  
197 **Neurological abnormalities and cognitive ability in first-episode psychosis**  
P. Dazzan, T. Lloyd, K.D. Morgan, J. Zanelli, C. Morgan, K. Orr, G. Hutchinson, P. Fearon, M. Allin, L. Rifkin, P.K. McGuire, G.A. Doody, J. Holloway, J. Leff, G. Harrison, P.B. Jones, and R.M. Murray  
203 **Duration of untreated psychosis and social function: 1-year follow-up study of first-episode schizophrenia**  
T.R.E. Barnes, V.C. Leeson, S.H. Mutsatsa, H.C. Watt, S.B. Hutton, and E.M. Joyce  
209 **Emotion in Beethoven and his music—psychiatry in music**  
Francois Mai  
210 **White matter volume changes in people who develop psychosis**  
M. Walterfang, P.K. McGuire, A.R. Yung, L.J. Phillips, D. Velakoulis, S.J. Wood, J. Suckling, E.T. Bullmore, W. Brewer, B. Soulsby, P. Desmond, P.D. McGorry, and C. Pantelis  
216 **Grey matter abnormalities in trichotillomania: morphometric magnetic resonance imaging study**  
S.R. Chamberlain, L.A. Menzies, N.A. Fineberg, N. del Campo, J. Suckling, K. Craig, U. Müller, T.W. Robbins, E.T. Bullmore, and B.J. Sahakian
- 221 **The Most Serious Moment of Our Lives - poems by doctors**  
Ron Charach  
222 **Cerebral and autonomic responses to emotional facial expressions in depersonalisation disorder**  
E. Lemche, A. Anilkumar, V.P. Giampietro, M.J. Brammer, S.A. Surguladze, N.S. Lawrence, D. Gasston, X. Chitnis, S.C.R. Williams, M. Sierra, P. Joraschky, and M.L. Phillips  
229 **Serotonin 5-HT<sub>1A</sub> receptor binding in people with panic disorder: positron emission tomography study**  
J.R. Nash, P.A. Sargent, E.A. Rabiner, S.D. Hood, S.V. Argyropoulos, J.P. Potokar, P.M. Grasby, and D.J. Nutt  
235 **Ethnic density, physical illness, social deprivation and antidepressant prescribing in primary care: ecological study**  
P. Walters, M. Ashworth, and A. Tylee  
240 **Attitudes and support needs of Black Caribbean, south Asian and White British carers of people with dementia in the UK**  
V. Lawrence, J. Murray, K. Samsi, and S. Banerjee  
246 **Recidivism regarded from the Environmental and Psycho-Pathological Standpoints – 100 years ago**  
Henry Rollin  
247 **Executive function and in-patient violence in forensic patients with schizophrenia**  
R.S. Fullam and M.C. Dolan  
253 **Did Ezekiel have catatonia? – psychiatry in the Old Testament**  
George Stein
- Short report**  
254 **Verbal memory and treatment response in post-traumatic stress disorder**  
J. Wild and R.C. Gur
- Columns**  
256 Correspondence  
259 Corrections  
260 Book reviews  
264 Contents of *Advances in Psychiatric Treatment*  
265 Contents of the *American Journal of Psychiatry*  
266 From the Editor's desk

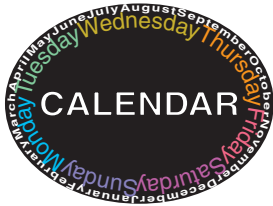

Continued from page A28

## OCTOBER

**Oct 14–17**, 57th Annual Meeting of the American Academy of Child and Adolescent Psychiatry, Boston, MA. Contact: AACAP, 3615 Wisconsin Avenue, N.W., Washington, DC 20016-3007; (202) 966-7300 (tel), (202) 966-2891 (fax), meetings@aacap.org (e-mail), www.aacap.org (web site).

**FREE AUDIO! Have You Heard?**

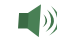

You can listen to highlights of *The American Journal of Psychiatry* by downloading a monthly free .mp3 audio file from our website (<http://ajp.psychiatryonline.org/misc/audio.dtl>) or by subscribing to the AJP Audio podcast at iTunes or other feed reader.

## MAY 2010

**May 22–27**, 163rd Annual Meeting of the American Psychiatric Association, New Orleans, LA. Contact: Cathy Nash, APA Annual Meetings Dept., 1000 Wilson Blvd., Ste. 1825, Arlington, VA 22209; (703) 907-7822.

### Continuing Medical Education

Three articles in each issue provide an opportunity to earn up to 1 hour category 1 **CME** credit each by taking a course covering the content. Credit available online only with purchased subscription to AJP's CME program. Visit [cme.psychiatryonline.org](http://cme.psychiatryonline.org) for details.

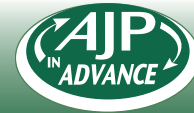

### GET AHEAD!

Subscribers can now view PDFs of all new research articles before print publication by clicking on the "AJP in Advance" logo at the AJP website ([ajp.psychiatryonline.org](http://ajp.psychiatryonline.org)).

## Coming in the November 2008 issue\*

### THE AMERICAN JOURNAL OF PSYCHIATRY

*Double-Blind Comparison of First- and Second-Generation Antipsychotics in Early-Onset Schizophrenia and Schizo-affective Disorder: Findings From the Treatment of Early-Onset Schizophrenia Spectrum Disorders (TEOSS) Study*

L. Sikich, J.A. Frazier, J. McClellan, R.L. Findling, B. Vitiello, L. Ritz, D. Ambler, M. Puglia, A.E. Maloney, E. Michael, S. De Jong, K. Slifka, N. Noyes, S. Hlastala, L. Pierson, N.K. McNamara, D. Delpuerto-Bedoya, R. Anderson, R.M. Hamer, and J.A. Lieberman

*A Multiple-Center, Randomized, Double-Blind, Placebo-Controlled Study of Oral Aripiprazole for Treatment of Adolescents With Schizophrenia*

R.L. Findling, A. Robb, M. Nyilas, R.A. Forbes, N. Jin, S. Ivanova, R. Marcus, R.D. McQuade, T. Iwamoto, and W.H. Carson

*Naltrexone for the Treatment of Amphetamine Dependence: A Randomized, Placebo-Controlled Trial*

N. Jayaram-Lindström, A. Hammarberg, O. Beck, and J. Franck

*Does Bereavement-Related Major Depression Differ From Major Depression Associated With Other Stressful Life Events?*

K.S. Kendler, J. Myers, and S. Zisook

\*Can't wait? Visit [ajp.psychiatryonline.org](http://ajp.psychiatryonline.org) and click the "AJP in Advance" logo to see all articles uploaded in advance of print!

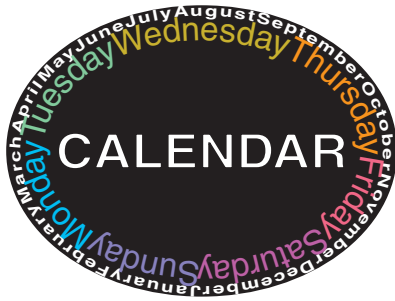

For free listing of your organization's official annual or regional meeting, please send us the following information: sponsor, location, inclusive dates, type and number of continuing education credits (if available), and the name, address, and telephone number of the person or group to contact for more information. In order for an event to appear in our listing, all notices and changes must be received at least 6 months in advance of the meeting and should be addressed to:

*Calendar, American Journal of Psychiatry, 1000 Wilson Boulevard, Suite 1825, Arlington, VA 22209-3901, jblair@psych.org (e-mail).*

*Because of space limitations, only listings of meetings of the greatest interest to Journal readers will be included.*

## OCTOBER

**October 2–5**, 60th Institute on Psychiatric Services, American Psychiatric Association, Chicago, IL. Contact: Jill Gruber, APA Annual Meetings Dept., 1000 Wilson Blvd., Ste. 1825, Arlington, VA 22209; (703) 907-7815.

**October 17–19**, 3rd International Conference on Schizophrenia (IConS III), Chennai, India. Contact: Schizophrenia Research Foundation (SCARF), scarf@vsnl.com (e-mail), www.icons-scarf.org (web site).

**October 28–November 2**, 55th Annual Meeting of the American Academy of Child and Adolescent Psychiatry, Chicago. Contact: AACAP, 3615 Wisconsin Avenue, N.W., Washington, DC 20016-3007; (202) 966-7300 (tel), (202) 966-2891 (fax), meetings@aacap.org (e-mail), www.aacap.org (web site).

## NOVEMBER

**November 6–7**, 20th Annual Advances in Psychiatry, Ann Arbor. Contact: Registrar, Office of Continuing Medical Education, University of Michigan Medical School, G1200 Towsley Center, 1500 E. Medical Center Drive, SPC 5201, Ann Arbor, MI 48109-5201; (734) 763-1400 (tel), (734) 936-1641 (fax), OCME@umich.edu (e-mail), <http://cme.med.umich.edu> (web site)

**November 14–17**, Annual Conference of the International Society for the Study of Trauma and Dissociation, Chicago. Contact: Heidi Walker, Executive Director; hwalker@amg-inc.com (e-mail), isst-d.org (web site).

## FEBRUARY 2009

**February 18–22**, Annual Meeting of the American Neuropsychiatric Association (ANPA), San Antonio, TX. Contact: ANPA office; (614) 447-2077 (tel), (614) 263-4366 (fax), anpa@osu.edu (e-mail), www.anpaonline.org (web site).

**February 25–March 1**, American College of Psychiatrists Annual Meeting, Tucson, AZ. Contact: 122 South Michigan Avenue, Suite 1360, Chicago, IL 60603; (312) 662-1020 (tel), (312) 662-1025 (fax), angel@ACPsych.org (e-mail).

## MARCH

**March 5–8**, 22nd Annual Meeting of the American Association for Geriatric Psychiatry, Honolulu. Contact: AAGP, 7910 Woodmont Ave., Ste. 1050, Bethesda, MD 20814-3004; (301) 654-7850 (tel), (301) 654-4137 (fax), www.aagpmeeting.org (web site).

**March 27–29**, 3rd International Conference of The International Society of Interpersonal Psychotherapy (ISIPT), New York City, NY. Contact: 2009 ISIPT Planning Committee; hv2009@columbia.edu (e-mail).

## APRIL

**April 22–26**, Annual Meeting and Scientific Sessions of the Society of Behavioral Medicine, Montreal, Quebec. Contact: Society of Behavioral Medicine, (414) 918-3156 (tel), (414) 276-3349 (fax), info@sbm.org (e-mail).

## MAY

**May 16–21**, 162nd Annual Meeting of the American Psychiatric Association, San Francisco, CA. Contact: Cathy Nash, APA Annual Meetings Dept., 1000 Wilson Blvd., Ste. 1825, Arlington, VA 22209; (703) 907-7822.

## JUNE

**June 16–20**, 2nd Thematic Conference on Legal and Forensic Psychiatry, Madrid, Spain. Contact: World Psychiatric Association, Alfredo Calcedo Barba, forensicpsychiatry2009@gmail.com.

## AUGUST

**August 27–30**, Canadian Psychiatric Association 59th Annual Meeting, St. Johns, Newfoundland, Canada. Contact: 260-441 MacLaren Street, Ottawa, ON K2P 2H3, Canada; (800) 267-1555 (tel), (613) 234-9857 (fax), conferene@cpa-apc.org (e-mail), www.cpa-apc.org (web site).

## OCTOBER

**October 8–11**, 61st Institute on Psychiatric Services, American Psychiatric Association, New York, NY. Contact: Jill Gruber, APA Annual Meetings Dept., 1000 Wilson Blvd., Ste. 1825, Arlington, VA 22209; (703) 907-7815.

**October 27–November 1**, 56th Annual Meeting of the American Academy of Child and Adolescent Psychiatry, Honolulu, HI. Contact: AACAP, 3615 Wisconsin Avenue, N.W., Washington, DC 20016-3007; (202) 966-7300 (tel), (202) 966-2891 (fax), meetings@aacap.org (e-mail), www.aacap.org (web site).

*Continued on page A36*
